# Supplementary material for: GO–Cu7S4 catalyzed ortho-aminomethylation of phenol derivatives with N,N-dimethylbenzylamines: site-selective oxidative CDC
Source: Royal Society of Chemistry journal article supplement (doi:10.1039/c8cc03396j), 2018-01-01
Supplement: c8cc03396j1.pdf [file c8cc03396j1.pdf]

### Supporting Information

#### GO-Cu<sub>7</sub>S<sub>4</sub> catalyzed *ortho*-aminomethylation of phenol derivatives with *N,N*-dimethylbenzylamines : site selective oxidative CDC†

Sonu Gupta, Nisha Chandna, Pooja Dubey, Ajai K. Singh and Nidhi Jain\*

Department of Chemistry, Indian Institute of Technology, New Delhi-110016

\*E-mail: [njain@chemistry.iitd.ac.in](mailto:njain@chemistry.iitd.ac.in); Fax: +91 11 26581102; Tel: +91 11 26591562

### Table of content

| S.No. | Particulars                                                                                                                | Pages       |
|-------|----------------------------------------------------------------------------------------------------------------------------|-------------|
| 1.    | Experimental Section: General Remarks                                                                                      | S2- S3      |
| 2.    | Reagent Information, Procedure for the synthesis of GO and Cu <sub>2</sub> S NPs                                           | S3- S4      |
| 3.    | Procedure for the synthesis of GO-Cu <sub>7</sub> S <sub>4</sub> NPs, Powder XRD Data of GO<br>HRTEM Images                | S4          |
| 4.    | SEM-EDX Data and Elemental Mapping Images Powder XRD Data of GO-<br>Cu <sub>7</sub> S <sub>4</sub> , Raman and IR spectra  | S5-S7       |
| 5.    | XPS Data, Size Distribution Curve, Procedure of Reusability and graph,<br>Solubility and stability of NPs, Powder XRD Data | S8-S10      |
| 6.    | General procedure for the preparation of <i>N,N</i> -dimethylbenzylamines                                                  | S10         |
| 7.    | General procedure for the synthesis of compounds ( <b>3a-3p</b> , <b>5a-5k</b> and <b>7a-7e</b> )                          | S10         |
| 8.    | Spectral data: <sup>1</sup> H NMR, <sup>13</sup> C{ <sup>1</sup> H} NMR and HRMS                                           | S11-<br>S22 |
| 9.    | Crystallographic Description and References                                                                                | S23-<br>S25 |
| 10.   | Spectra: <sup>1</sup> H NMR, <sup>13</sup> C{ <sup>1</sup> H} NMR                                                          | S26-<br>S57 |

|     |                                                                                                                         |         |
|-----|-------------------------------------------------------------------------------------------------------------------------|---------|
| 11. | Procedure for free radical reaction: Inhibition by TEMPO                                                                | S58     |
| 12. | Procedure for HRMS and time dependent NMR of reaction mixture: evidence in favour of Iminium ion and Proposed Mechanism | S58-S60 |

## EXPERIMENTAL SECTION

### General Remarks

All reactions were carried out in oven-dried round bottom flasks. Reagents were purchased at the highest commercial quality and used without further purification, unless otherwise stated. Reactions were monitored by thin layer chromatography (TLC) carried out on a 0.25 mm silica gel plates (60F–254) and visualized under UV illumination at 254 nm and iodine chamber. Further visualization was achieved by iodine vapour adsorbed on silica gel depending on the product type. Organic extracts were dried over anhydrous sodium sulphate. Solvents were removed in a rotary evaporator under reduced pressure. Column chromatography was performed on silica gel 100–200 mesh using a mixture of hexane and ethyl acetate as eluent, and isolated compounds were characterized by  $^1\text{H}$  NMR,  $^{13}\text{C}\{^1\text{H}\}$  NMR, and HRMS data. NMR spectra for all the samples were taken in deuteriochloroform ( $\text{CDCl}_3$ ) as the solvent.  $^1\text{H}$  and  $^{13}\text{C}$ -NMR spectra were recorded at ambient temperature on 400MHz, 300 MHz and 75 MHz spectrometer using tetramethylsilane (TMS) as internal reference. The chemical shifts are quoted in  $\delta$  units, parts per million (ppm) up field from the signal of internal TMS.  $^1\text{H}$  NMR data is represented as follows: Chemical shift, multiplicity (s = singlet, d = doublet, t = triplet, q = quartet, m = multiplet, dd = double doublet, td = triplet of doublets), integration and coupling constant(s)  $J$  in Hertz (Hz). High resolution mass spectra (HRMS) were recorded on a Mass spectrometer using electrospray ionization-time of flight (ESI-TOF) reflectron experiments.

For EDX studies, instrument was used Model QuanTax 200, based on the SDD technology and giving an energy resolution of 127 eV at  $\text{MnK}\alpha$  to estimate elemental compositions. Sample was mounted on a circular metallic sample holder with a sticky carbon tape. Powder X-ray diffraction (PXRD) studies were carried out on a Bruker D8 Advance diffractometer using Ni-filtered  $\text{CuK}\alpha$  radiation, scan speed of 1 s and scan step of  $0.05^\circ$ . Transmission electron microscopic (TEM) studies were carried out using a JEOL JEM200CX TEM instrument operated at 200 kV. The

specimens for these studies were prepared by dispersing the powdered sample in ethanol by ultrasonic treatment. Few drops of resulting solution were put on a porous carbon film supported on a copper grid and dried in air. ICP-AES was done using ARCOS system from M/s. Spectro, Germany. Raman spectra were recorded with a Renishaw (INVIA) confocal microdispersive Raman spectrometer using a 532 nm solid state laser in a regular mode. IR (KBr) spectra (4000–400  $\text{cm}^{-1}$ ) were recorded on a Nicolet Protege 460 FT-IR spectrometer. X-ray photoelectron spectroscopy (XPS) measurements were carried out using an EA 125 electron spectrometer manufactured by OMICRON Nanotechnology GmbH (Germany), with Al-K $\alpha$  radiation (1486.7 eV).

### Reagent Information

Trioctylphosphine (TOP),  $\text{CuSO}_4 \cdot 5\text{H}_2\text{O}$ , Thiophenol, 6-bromo naphthol, and 7-methoxy naphthol were procured from Sigma-Aldrich (USA). *N,N*-dimethylbenzylamine (Acros organics) were used as received. All solvents of AR grade *i.e.* acetone, diethylether, ethanol were dried and distilled before use by known standard procedures.<sup>1</sup>

### Synthesis of graphene oxide (GO)<sup>2</sup>

GO was synthesized by the modified Hummers' procedure. Graphite powder (500 mg) and sodium nitrate (2.0 g) were put into cold (temp.  $<5^\circ\text{C}$ ) concentrated  $\text{H}_2\text{SO}_4$  (18 mL, 98%). The mixture was stirred continuously for 1 h at temperature  $\sim 5^\circ\text{C}$  in an ice bath. Potassium permanganate (3 g) was added gradually and the reaction continued for another 2 h at temperature below  $5^\circ\text{C}$ . The mixture was heated for 30 min at  $35^\circ\text{C}$  during which 40 mL of deionised (DI) water was added slowly. The temperature of the mixture was increased to  $100^\circ\text{C}$  and kept at that temperature for 15 min. The mixture was cooled to room temperature and diluted with 70 mL of DI water. Thereafter 10 mL of  $\text{H}_2\text{O}_2$  (35%) was added. The colour of the suspension changed to bright yellow. The suspension was filtered and washed successively with 400 mL of 5% HCl twice and 70 mL of DI water thrice. Finally, the precipitate was dried in a vacuum desiccator for at least 5 days before further use.

### Procedure for the synthesis of $\text{Cu}_2\text{S}$ Nanoparticles

A slurry containing 0.5 mmol CuSPh in 2 mL trioctylphosphine (TOP) in a three neck 50 mL round bottom flask was heated under  $\text{N}_2$  atmosphere to  $100^\circ\text{C}$  to remove water and oxygen. The resulting homogeneous solution was heated to  $320^\circ\text{C}$  for 1.5 h with continuous stirring affording

brownish black colloidal solution. The mixture was cooled to room temperature and 20 mL of acetone was added into the flask to obtain a brown precipitate which was separated by centrifugation. The precipitate was washed three times with acetone (20 mL) and dried in vacuum.

### Procedure for the synthesis of GO-Cu<sub>7</sub>S<sub>4</sub> Nanoparticles

In a typical synthesis, 100 mg of GO synthesized as above was completely dissolved in 20 mL of DI water. 40 mg of Cu<sub>2</sub>S prepared as above was dispersed in 20 mL of toluene and was added to GO solution. The mixture was stirred for 24 h at room temperature. The precipitate was separated and washed with acetone. The composite so obtained were labelled as GO-Cu<sub>7</sub>S<sub>4</sub> NPs.

### HRTEM Images

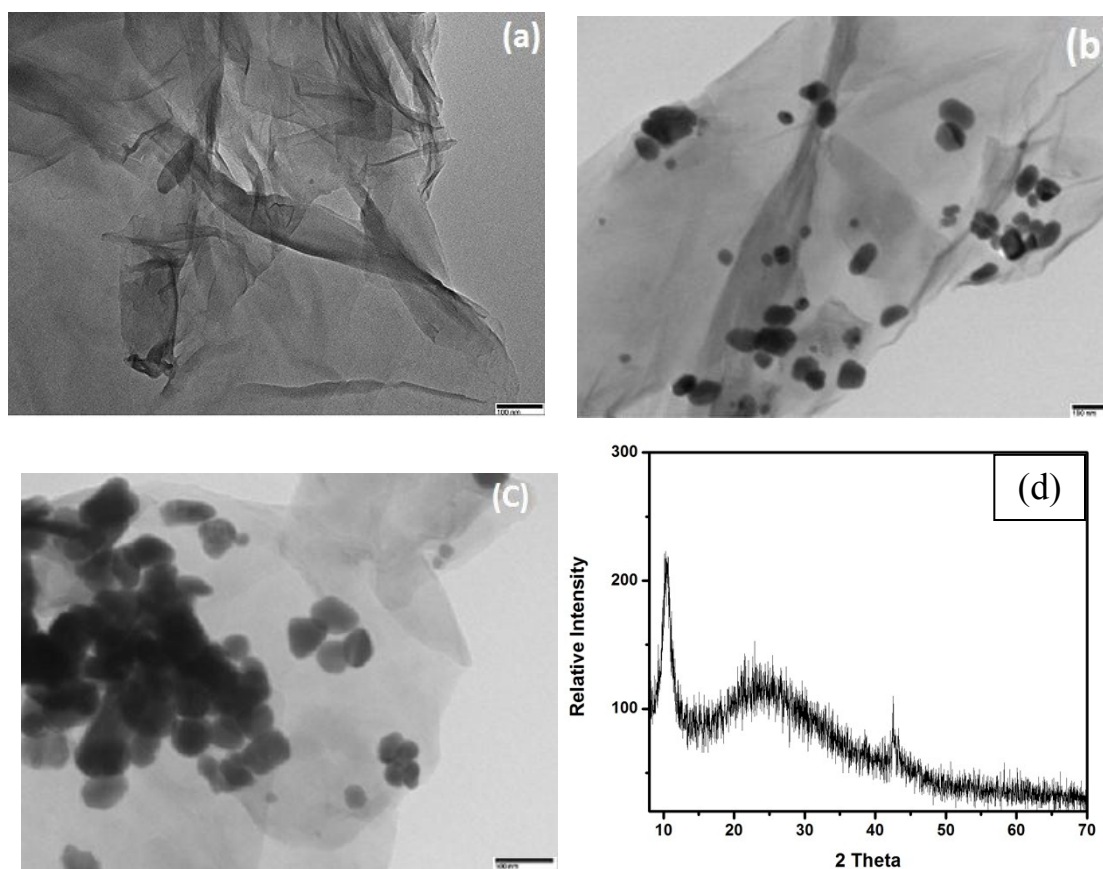

**Fig. S1** HRTEM images (100 nm) of (a) GO and (b) GO-Cu<sub>7</sub>S<sub>4</sub> NPs (c) GO-Cu<sub>7</sub>S<sub>4</sub> NPs after 6<sup>th</sup> cycle and (d) PXRD pattern of GO

## SEM-EDX Data

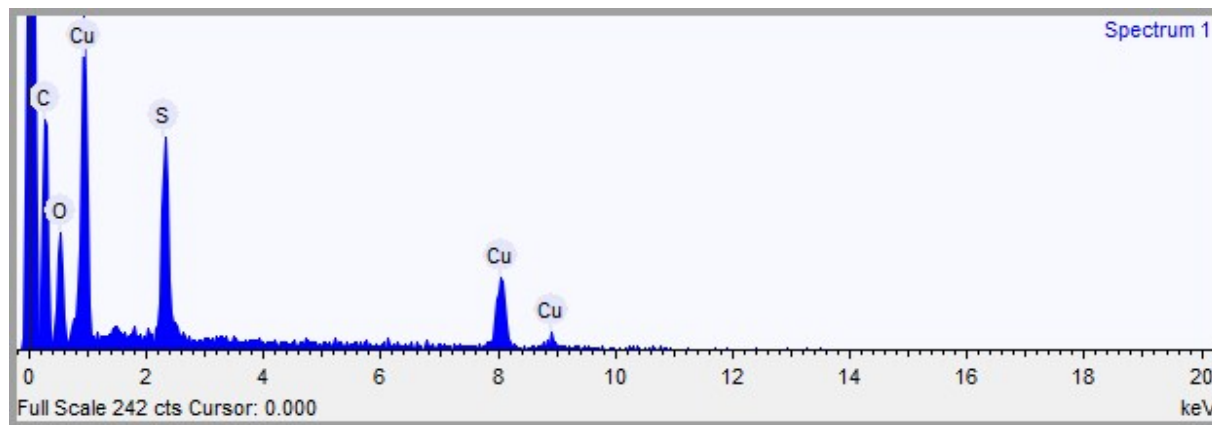

**Fig. S2** SEM-EDX of GO-Cu<sub>7</sub>S<sub>4</sub> NPs

## Elemental mapping:

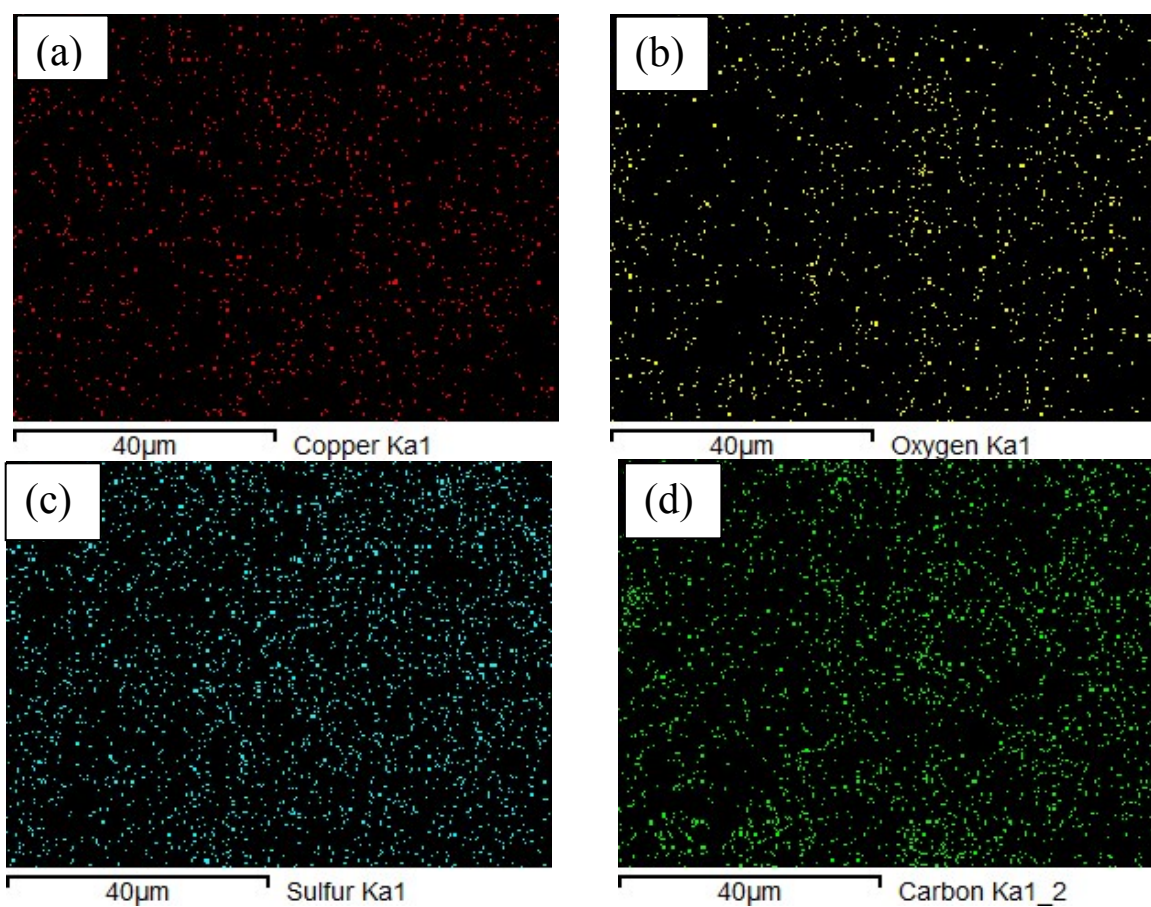

**Fig. S3** Elemental mapping of GO-Cu<sub>7</sub>S<sub>4</sub> NPs (a) Cu, (b) O, (c) S and (d) C

To investigate the elemental composition of the prepared catalyst, energy-dispersive X-ray spectroscopy (EDX) elemental mappings of the GO-Cu<sub>7</sub>S<sub>4</sub> catalyst were carried out (Fig. S3), and peaks corresponding to the elements carbon, oxygen, copper and sulphur were detected. The elemental mapping images indicated a homogeneous distribution of the elements (C, O, Cu and S) in GO-Cu<sub>7</sub>S<sub>4</sub>. Coexistence of C and O with Cu and S confirmed the loading of Cu<sub>7</sub>S<sub>4</sub> on the surface of graphene oxide. The percentages of Cu, S, C and O elements in the catalysts were also determined from the EDX spectrum (Fig. S2), and the Cu/S ratio (7/4) matched with the PXRD data.

### Powder-XRD Data

The powder X-ray diffraction pattern of Cu<sub>7</sub>S<sub>4</sub> NPs (Fig. S4) was indexed on the basis of a monoclinic unit cell (JCPDS # 23-0958) with d values (Å) (hkl): 3.60 (372), 3.35 (1600), 3.00 (804), 2.86 (1821), 2.63 (2001), 2.53 (2040), 2.45 (155), 2.37, 2.12 (6141), 1.93 (0160), 1.86 (886).

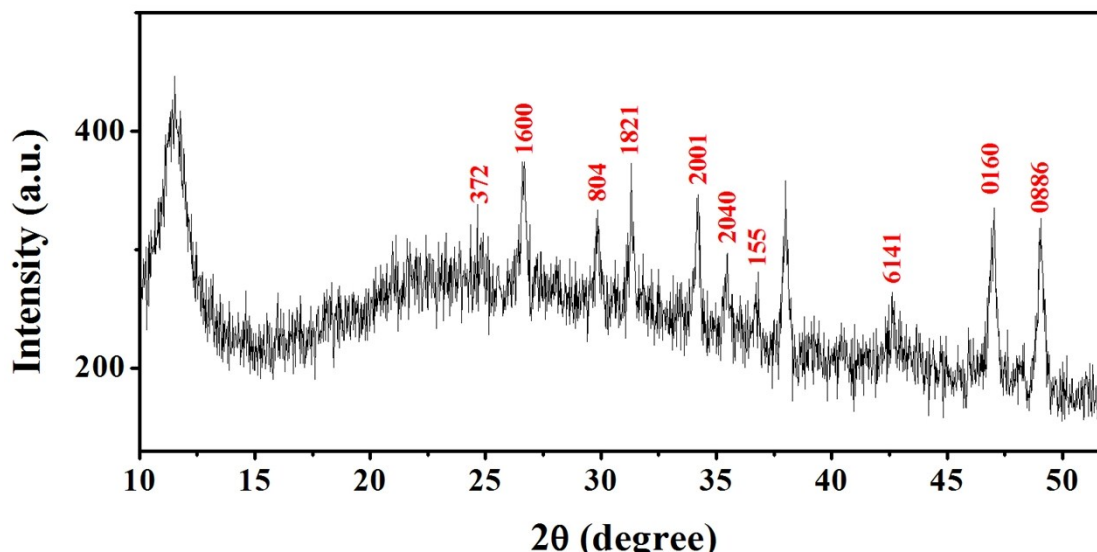

**Fig. S4** PXRD of GO-Cu<sub>7</sub>S<sub>4</sub> NPs

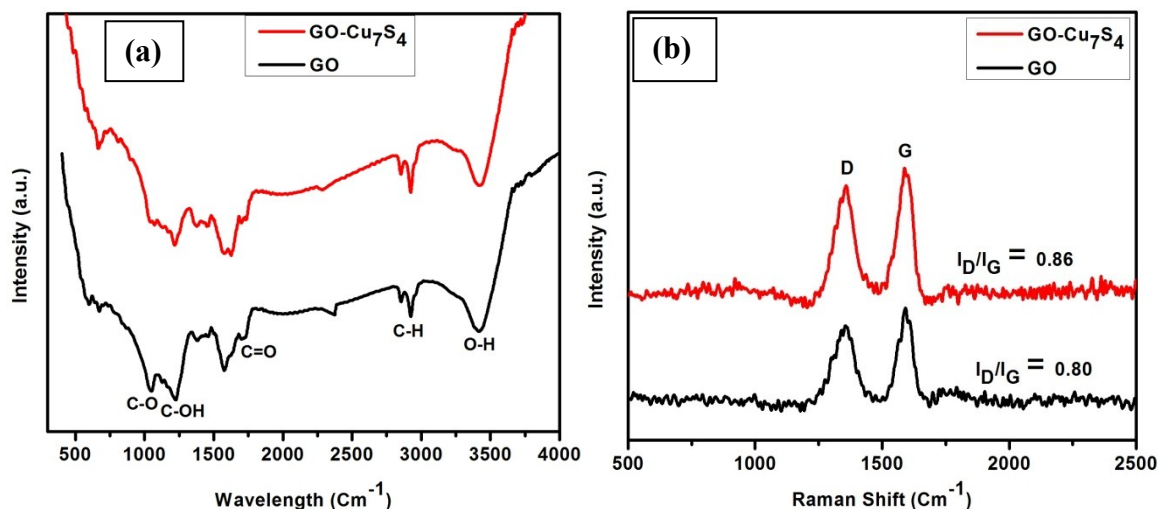

**Fig. S5** (a) IR and (b) Raman spectra of GO, and GO–Cu<sub>7</sub>S<sub>4</sub>

Fig. S5(a) represents the FTIR spectra of GO, and GO–Cu<sub>7</sub>S<sub>4</sub> samples. The FTIR spectrum of GO clearly shows the abundance of oxygen containing groups. For GO, broad absorption at 3425 cm<sup>-1</sup> can be assigned to O–H stretching vibration. Other peaks at 1725, 1245 and 1041 cm<sup>-1</sup> appear due to C–O stretching, O–H bending and C–O (epoxy) stretching modes. The peaks centered at 2856 and 2925 cm<sup>-1</sup> in the GO spectrum also remain prominent in GO–Cu<sub>7</sub>S<sub>4</sub>, and can be assigned to –CH<sub>2</sub> stretching vibrations of graphene sheets. The FTIR spectrum of GO–Cu<sub>7</sub>S<sub>4</sub> sample showed appearance of a new absorption peak at 660 cm<sup>-1</sup> due to metal-oxygen bond. As depicted by Raman {Fig. S5(b)}, D band at 1357 cm<sup>-1</sup> and G band at 1588 cm<sup>-1</sup> corresponding to typical features of GO was observed. The intensity ratio calculated for D and G band shows increase in I<sub>D</sub>/I<sub>G</sub> ratio. The increase in intensity ratio in case of GO–Cu<sub>7</sub>S<sub>4</sub> indicates the abundance of surface defects and disorder in graphene sheets caused by the presence of copper sulphide nanoparticles. The structural defects are believed to enhance the catalytic activity.<sup>3</sup>



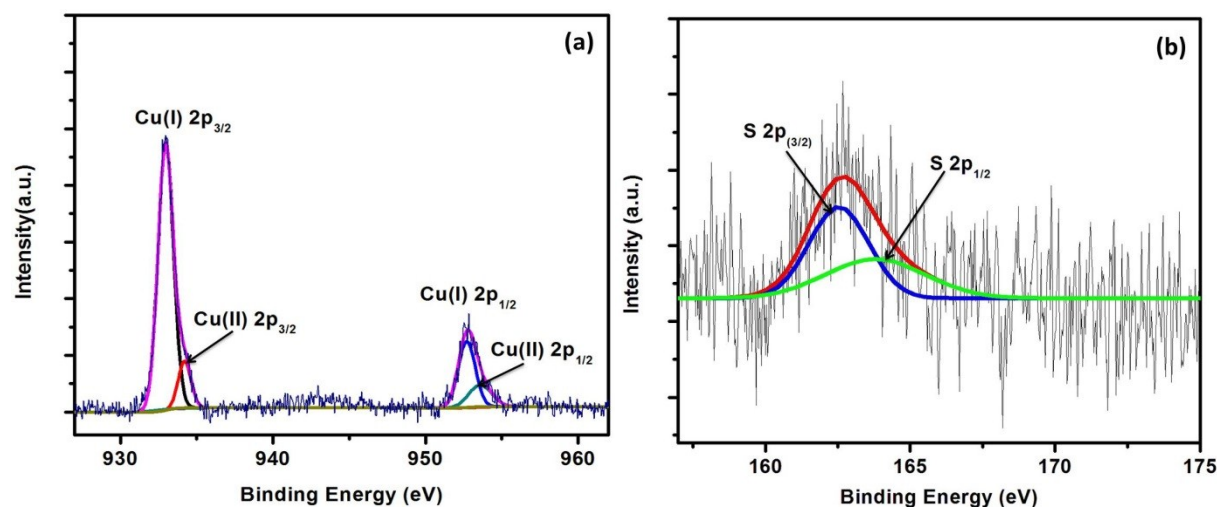

**Fig. S6** High-resolution XPS of Cu<sub>7</sub>S<sub>4</sub> NPs (a) Cu 2p and (b) S 2p

#### Size Distribution Curve:

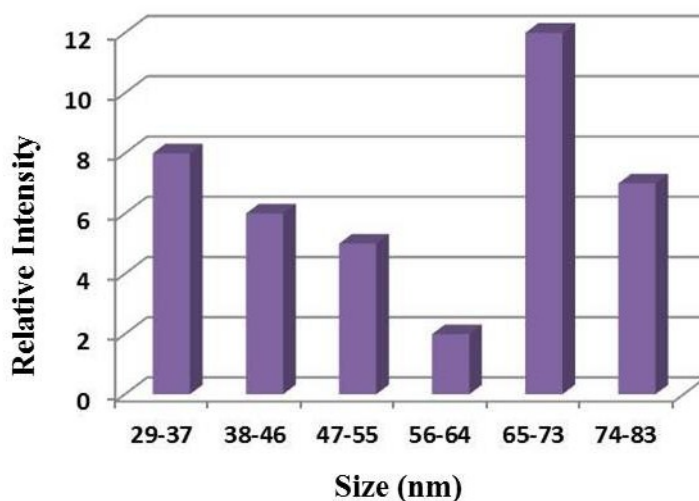

**Fig. S7** Size distribution curve of GO-Cu<sub>7</sub>S<sub>4</sub> NPs

#### Reusability of GO-Cu<sub>7</sub>S<sub>4</sub> NPs

To check the reusability of the catalyst for the next catalytic cycle, it was recovered from the reaction mixture by centrifugation, washed with ethanol and dried in vacuum. It was reused for a fresh batch of reaction between *N,N*-dimethylbenzylamine and phenol. The activity of the recovered GO-Cu<sub>7</sub>S<sub>4</sub> catalyst was examined up to seven cycles, and was found to decrease slightly after every reaction (Fig. S8 of SI). After the sixth cycle, the reaction mixture containing catalyst was centrifuged, and its surface morphology was compared to fresh catalyst using TEM (Fig. S1(c)) which showed agglomeration of the catalyst. The copper content GO-Cu<sub>7</sub>S<sub>4</sub> was



studied using ICP-AES before and after the sixth reaction cycle. It was 1 mol % in fresh sample and 0.88 mol % after sixth run. The change in amount of copper present in catalyst was insignificant and ruled out leaching of metal.

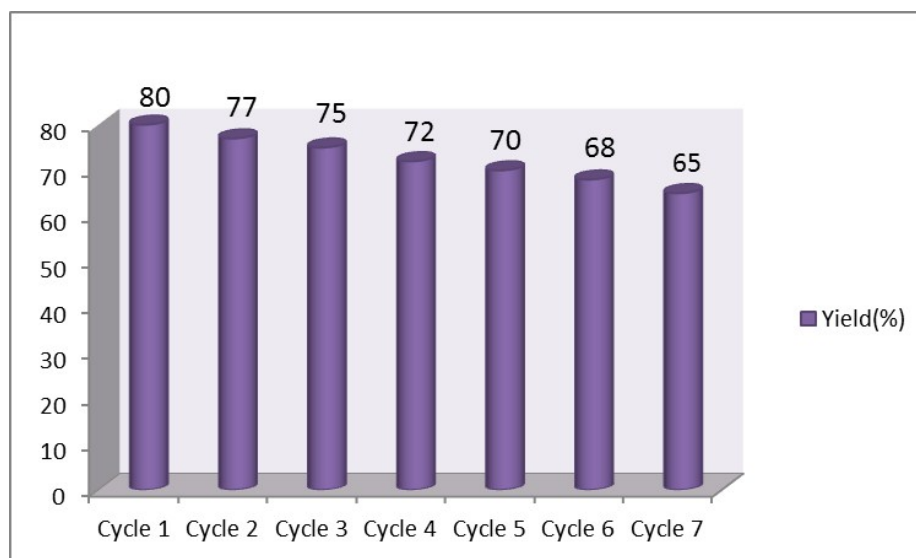

**Fig. S8** Reusability graph of GO-Cu<sub>7</sub>S<sub>4</sub> NPs till 7<sup>th</sup> cycle

#### **Solubility and Stability of GO-Cu<sub>7</sub>S<sub>4</sub> NPs**

GO-Cu<sub>7</sub>S<sub>4</sub> NPs were found to be sparingly soluble in toluene, EtOH, DMF and DMSO; and insoluble in CHCl<sub>3</sub>, CH<sub>2</sub>Cl<sub>2</sub>, diethyl ether, ethyl acetate, hexane, CH<sub>3</sub>CN and CH<sub>3</sub>OH. The NP could be stored for up to two months in vacuum under desiccator. The stability was checked by taking its PXRD taken after 6 months. (Fig. S9)

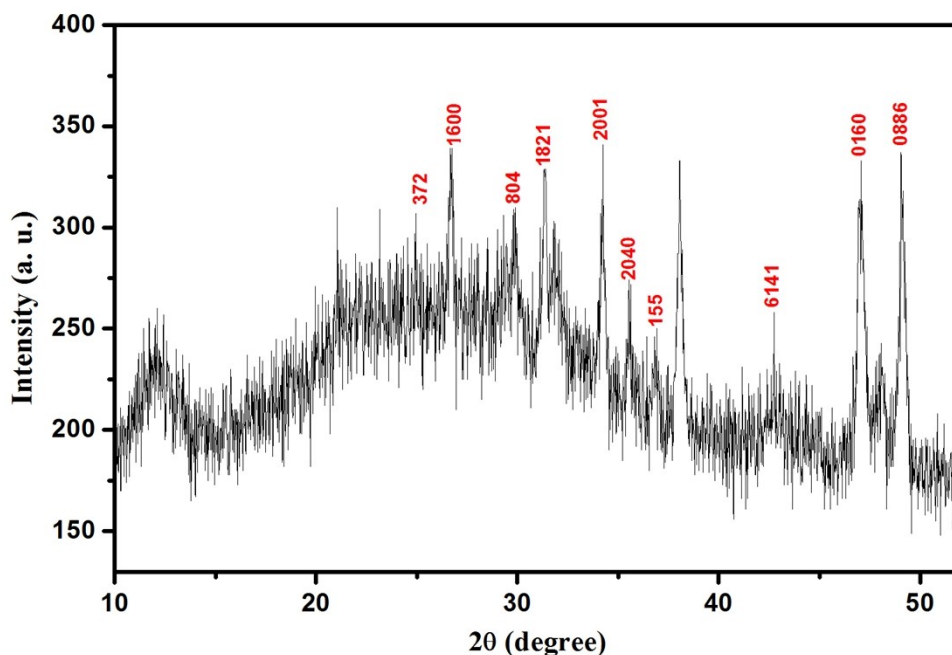

**Fig. S9** PXRD of GO-Cu<sub>7</sub>S<sub>4</sub> NPs after 6 months

**General procedure for the preparation of *N,N*-dimethyl benzylamines:**

In a beaker containing 30 mL aq. solution of KOH (73.1 mmol), dimethylamine hydrochloride (38.5 mmol) was added, and the contents were stirred for 5 min. This solution was then added to a 100 mL round bottom flask containing benzyl bromide or chloride (5.0 mmol) in 30 mL DCM. The reaction mixture was stirred for 5h at room temperature. After completion of the reaction, the mixture was washed with brine (1 x 10 mL), subsequently with distilled water (2 x 10 mL) and then dried over anhydrous Na<sub>2</sub>SO<sub>4</sub>. Solvent was evaporated.

**General procedure for the synthesis of compounds (3a-3p, 5a-5k and 7a-7e):**

To the mixture of phenol (**1**)/naphthol (**4**) (0.5 mmol), *N,N*-dimethylbenzylamine (**2**) (1.0 mmol), and GO-Cu<sub>7</sub>S<sub>4</sub> NP catalyst (4 mg, 1 mol%), *tert*-butyl hydroperoxide (0.2 mL, 1.2 mmol decane solution) was added under nitrogen at room temperature. The reaction temperature was raised to 50 °C and the contents were stirred at the same temperature for 2 h. The reaction mixture was then cooled to room temperature. The resulting suspension was diluted with ethylacetate and the organic layer was washed off with brine solution (3 × 10 mL) and dried over anhydrous Na<sub>2</sub>SO<sub>4</sub>. Solvent was evaporated and the residue was purified by column chromatography on silica gel (eluting with hexane/ethyl acetate = 95:5).

## Spectral Data:

### 2-((benzyl(methyl)amino)methyl)phenol (3a):

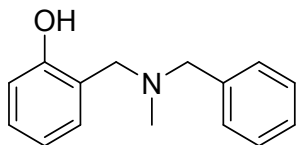

Colourless liquid (0.182 g, 80%).  $^1\text{H}$  NMR (300 MHz,  $\text{CDCl}_3$ ): 7.40-7.31 (m, 5H), 7.21 (td,  $J_1 = 7.8$  Hz,  $J_2 = 1.8$  Hz, 1H), 7.03 (d,  $J = 7.5$  Hz, 1H), 6.88 (dd,  $J_1 = 8.1$  Hz,  $J_2 = 0.9$  Hz, 1H), 6.82 (td,  $J_1 = 7.5$  Hz,  $J_2 = 1.2$  Hz, 1H), 3.78 (s, 2H), 3.63 (s, 2H), 2.27 (s, 3H).  $^{13}\text{C}$  NMR (75 MHz,  $\text{CDCl}_3$ ),  $\delta$  157.8, 136.8, 129.3, 128.8, 128.6, 128.5, 127.6, 121.9, 119.1, 116.1, 61.4, 60.9, 41.2. HRMS (ESI-TOF)  $m/z$ :  $[\text{M} + \text{H}]^+$  Calcd for  $\text{C}_{15}\text{H}_{18}\text{NO}$  228.1383; Found 228.1393.

### 2-(((2-chlorobenzyl)(methyl)amino)methyl)phenol (3b):

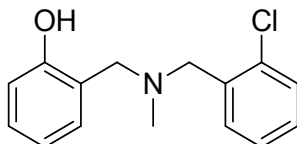

Colourless liquid (0.191 g, 73%).  $^1\text{H}$  NMR (300 MHz,  $\text{CDCl}_3$ ): 7.47-7.42 (m, 2H), 7.32-7.26 (m, 2H), 7.20 (t,  $J = 6.0$  Hz, 1H), 7.05 (d,  $J = 5.7$  Hz, 1H), 6.89 (d,  $J = 6.3$  Hz, 1H), 6.82 (t,  $J = 5.7$  Hz, 1H), 3.86 (s, 2H), 3.85 (s, 2H), 2.33 (s, 3H).  $^{13}\text{C}$  NMR (75 MHz,  $\text{CDCl}_3$ ),  $\delta$  157.5, 134.9, 133.8, 131.8, 129.9, 129.4, 129.2, 129.0, 127.1, 121.2, 119.3, 116.4, 60.2, 58.6, 40.9. HRMS (ESI-TOF)  $m/z$ :  $[\text{M} + \text{H}]^+$  Calcd for  $\text{C}_{15}\text{H}_{17}\text{ClNO}$  262.0993; Found 262.0990.

### 2-(((3-chlorobenzyl)(methyl)amino)methyl)phenol (3c):

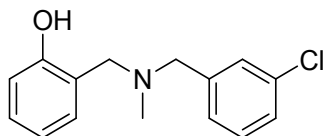

Colourless liquid (0.193 g, 74%).  $^1\text{H}$  NMR (300 MHz,  $\text{CDCl}_3$ ): 7.31-7.19 (m, 5H), 7.03 (d,  $J = 7.2$  Hz, 1H), 6.90 (d,  $J = 8.1$  Hz, 1H), 6.83 (t,  $J = 7.2$  Hz, 1H), 3.79 (s, 2H), 3.61 (s, 2H), 2.28 (s, 3H).  $^{13}\text{C}$  NMR (75 MHz,  $\text{CDCl}_3$ ),  $\delta$  157.6, 138.7, 134.4, 129.9, 129.4, 129.0, 128.7, 127.9, 127.4, 121.4, 119.3, 116.2, 60.8, 60.7, 41.2. HRMS (ESI-TOF)  $m/z$ :  $[\text{M} + \text{H}]^+$  Calcd for

C<sub>15</sub>H<sub>17</sub>ClNO 262.0993; Found 262.0994.

**2-(((4-chlorobenzyl)(methyl)amino)methyl)phenol (3d):**

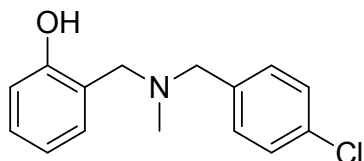

Colourless liquid (0.196 g, 75%). <sup>1</sup>H NMR (300 MHz, CDCl<sub>3</sub>): 7.36-7.33 (m, 2H), 7.28-7.18 (m, 3H), 7.02 (d, *J* = 7.2 Hz, 1H), 6.89-6.80 (m, 2H), 3.77 (s, 2H), 3.58 (s, 2H), 2.26 (s, 3H). <sup>13</sup>C NMR (75 MHz, CDCl<sub>3</sub>),  $\delta$  157.7, 135.3, 133.5, 130.6, 128.9, 128.8, 128.6, 121.64, 119.2, 116.1, 60.9, 60.5, 41.2. HRMS (ESI-TOF) *m/z*: [M + H]<sup>+</sup> Calcd for C<sub>15</sub>H<sub>17</sub>ClNO 262.0993; Found 262.0993.

**4-(((2-hydroxybenzyl)(methyl)amino)methyl)benzonitrile (3e):**

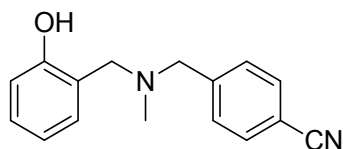

Colourless liquid (0.214 g, 85%). <sup>1</sup>H NMR (300 MHz, CDCl<sub>3</sub>): 7.68 (d, *J* = 7.8 Hz, 2H), 7.45 (d, *J* = 8.1 Hz, 2H), 7.23 (t, *J* = 7.8 Hz, 1H), 7.04 (d, *J* = 7.8 Hz, 1H), 6.91-6.82 (m, 2H), 3.80 (s, 2H), 3.66 (s, 2H), 2.29 (s, 3H). <sup>13</sup>C NMR (75 MHz, CDCl<sub>3</sub>),  $\delta$  157.5, 142.5, 132.4, 129.9, 129.1, 128.7, 121.4, 119.4, 118.6, 116.2, 111.7, 61.3, 60.9, 41.6. HRMS (ESI-TOF) *m/z*: [M + H]<sup>+</sup> Calcd for C<sub>16</sub>H<sub>17</sub>N<sub>2</sub>O 253.1335; Found 253.1333.

**2-((benzyl(methyl)amino)methyl)-4-fluorophenol (3f):**

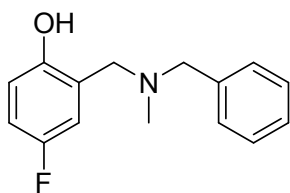

Colourless liquid (0.179 g, 73%). <sup>1</sup>H NMR (300 MHz, CDCl<sub>3</sub>): 7.38-7.28 (m, 5H), 6.87 (td, *J*<sub>1</sub> = 8.4 Hz, *J*<sub>2</sub> = 3.0 Hz, 1H), 6.79-6.76 (m, 1H), 6.75-6.70 (m, 1H), 3.71 (s, 2H), 3.60 (s, 2H), 2.24 (s, 3H). <sup>13</sup>C NMR (75 MHz, CDCl<sub>3</sub>),  $\delta$  153.8, 136.7, 129.4, 128.7, 127.9, 122.8 (2C), 116.8, 116.7, 115.1, 114.8, 61.5, 60.6, 41.4. HRMS (ESI-TOF) *m/z*: [M + H]<sup>+</sup> Calcd for C<sub>15</sub>H<sub>17</sub>FNO 246.1289; Found 246.1299.

**2-((benzyl(methyl)amino)methyl)-4-chlorophenol (3g):**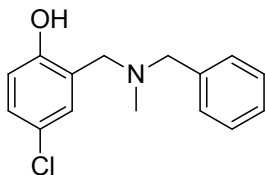

Colourless liquid (0.198 g, 76%).  $^1\text{H}$  NMR (300 MHz,  $\text{CDCl}_3$ ): 7.41-7.28 (m, 5H), 7.14 (dd,  $J_1 = 8.4$  Hz,  $J_2 = 2.4$  Hz, 1H), 6.99 (d,  $J = 2.4$  Hz, 1H), 6.80 (d,  $J = 8.7$  Hz, 1H), 3.73 (s, 2H), 3.62 (s, 2H), 2.26 (s, 3H).  $^{13}\text{C}$  NMR (75 MHz,  $\text{CDCl}_3$ ),  $\delta$  156.5, 136.5, 129.3, 128.6, 128.5, 128.2, 127.8, 123.6, 123.3, 117.4, 61.4, 60.4, 41.2. HRMS (ESI-TOF)  $m/z$ :  $[\text{M} + \text{H}]^+$  Calcd for  $\text{C}_{15}\text{H}_{17}\text{ClNO}$  262.0993; Found 262.0992.

**2-((benzyl(methyl)amino)methyl)-4-bromophenol (3h):**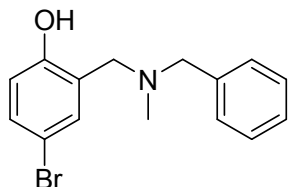

Colourless liquid (0.241 g, 79%).  $^1\text{H}$  NMR (300 MHz,  $\text{CDCl}_3$ ): 7.42-7.28 (m, 6H), 7.14 (d,  $J = 2.7$  Hz, 1H), 6.76 (d,  $J = 8.7$  Hz, 1H), 3.74 (s, 2H), 3.63 (s, 2H), 2.27 (s, 3H).  $^{13}\text{C}$  NMR (75 MHz,  $\text{CDCl}_3$ ),  $\delta$  157.1, 136.5, 131.5, 131.1, 129.3, 128.7, 127.8, 123.9, 117.9, 110.8, 61.5, 60.3, 41.3. HRMS (ESI-TOF)  $m/z$ :  $[\text{M} + \text{H}]^+$  Calcd for  $\text{C}_{15}\text{H}_{17}\text{BrNO}$  306.0488; Found 306.0487.

**2-((benzyl(methyl)amino)methyl)-6-chlorophenol (3i):**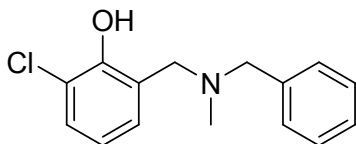

Colourless liquid (0.188 g, 72%),  $^1\text{H}$  NMR (300 MHz,  $\text{CDCl}_3$ ): 7.39-7.32 (m, 5H), 7.29-7.27 (m, 1H), 6.92 (d,  $J = 7.5$  Hz, 1H), 6.74 (t,  $J = 7.5$  Hz, 1H), 3.79 (s, 2H), 3.66 (s, 2H), 2.27 (s, 3H).  $^{13}\text{C}$  NMR (75 MHz,  $\text{CDCl}_3$ ):  $\delta$  153.7, 136.2, 129.4, 129.1, 128.7, 127.9, 126.8, 123.0, 120.8, 119.3, 61.6, 60.5, 41.1. HRMS (ESI-TOF)  $m/z$ :  $[\text{M} + \text{H}]^+$  Calcd for  $\text{C}_{15}\text{H}_{17}\text{ClNO}$  262.0993; Found 262.0993.

**3-((benzyl(methyl)amino)methyl)-4-hydroxybenzaldehyde (3j):**

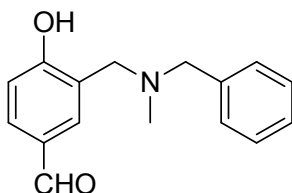

Colourless liquid (0.173 g, 68%).  $^1\text{H}$  NMR (300 MHz,  $\text{CDCl}_3$ ): 9.83 (s, 1H), 7.73 (dd,  $J_1 = 8.4$  Hz,  $J_2 = 2.1$  Hz, 1H), 7.61 (d,  $J = 1.8$  Hz, 1H), 7.42-7.31 (m, 5H), 6.96 (d,  $J = 8.4$  Hz, 1H), 3.85 (s, 2H), 3.66 (s, 2H), 2.30 (s, 3H).  $^{13}\text{C}$  NMR (75 MHz,  $\text{CDCl}_3$ )  $\delta$  190.7, 164.4, 136.1, 132.4, 129.9, 129.4, 128.7, 128.7, 128.0, 122.3, 116.7, 61.4, 60.3, 41.2. HRMS (ESI-TOF)  $m/z$ :  $[\text{M} + \text{H}]^+$  Calcd for  $\text{C}_{16}\text{H}_{18}\text{NO}_2$  256.1332; Found 256.1332.

**ethyl 3-((benzyl(methyl)amino)methyl)-4-hydroxybenzoate (3k):**

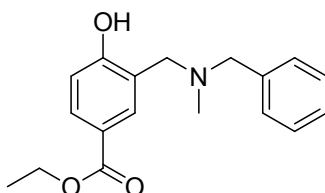

Colourless liquid (0.242 g, 81%).  $^1\text{H}$  NMR (300 MHz,  $\text{CDCl}_3$ ): 7.91 (dd,  $J_1 = 8.5$  Hz,  $J_2 = 2.1$  Hz, 1H), 7.60 (d,  $J = 1.2$  Hz, 1H), 7.41-7.31 (m, 5H), 6.88 (d,  $J = 8.4$  Hz, 1H), 4.35 (q,  $J = 7.2$  Hz, 2H), 3.82 (s, 2H), 3.64 (s, 2H), 2.27 (s, 3H), 1.39 (t,  $J = 7.2$  Hz, 3H).  $^{13}\text{C}$  NMR (75 MHz,  $\text{CDCl}_3$ )  $\delta$  166.5, 162.4, 136.4, 130.9, 130.4, 129.3, 128.7, 127.8, 121.4, 121.3, 116.0, 61.4, 60.5, 60.5, 41.2, 14.4. HRMS (ESI-TOF)  $m/z$ :  $[\text{M} + \text{H}]^+$  Calcd for  $\text{C}_{18}\text{H}_{22}\text{NO}_3$  300.1594; Found 300.1597.

**1-(3-((benzyl(methyl)amino)methyl)-2,4-dihydroxyphenyl)ethanone (3l):**

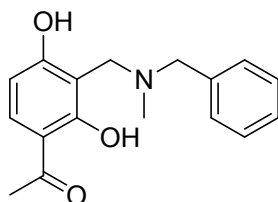

Colourless liquid (0.234 g, 82%).  $^1\text{H}$  NMR (300 MHz,  $\text{CDCl}_3$ ): 13.2 (s, 1H, OH), 7.59 (d,  $J = 8.7$  Hz, 1H), 7.41-7.32 (m, 5H), 6.40 (d,  $J = 9.0$  Hz, 1H), 3.93 (s, 2H), 3.68 (s, 2H), 2.56 (s, 3H), 2.32 (s, 3H).  $^{13}\text{C}$  NMR (75 MHz,  $\text{CDCl}_3$ )  $\delta$  202.5, 166.6, 162.4, 136.2, 131.7, 129.4, 128.7, 127.9, 112.5, 108.5, 107.7, 61.4, 52.9, 41.2, 26.0. HRMS (ESI-TOF)  $m/z$ :  $[\text{M} + \text{H}]^+$  Calcd for  $\text{C}_{17}\text{H}_{20}\text{NO}_3$  286.1438; Found 286.1438.

**3-((benzyl(methyl)amino)methyl)-2,4-dihydroxyphenyl)(phenyl)methanone (3m):**

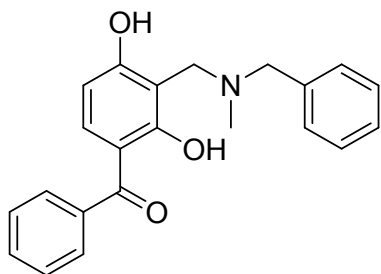

Colourless liquid (0.309 g, 89%).  $^1\text{H}$  NMR (300 MHz,  $\text{CDCl}_3$ ): 13.2 (s, 1H, OH), 7.66-7.63 (m, 2H), 7.59-7.46 (m, 4H), 7.43-7.31 (m, 5H), 6.37 (d,  $J = 8.7$  Hz, 1H), 4.0 (s, 2H), 3.72 (s, 2H), 2.36 (s, 3H).  $^{13}\text{C}$  NMR (75 MHz,  $\text{CDCl}_3$ ):  $\delta$  200.0, 166.9, 163.5, 138.5, 136.2, 134.8, 131.2, 129.4, 128.8, 128.7, 128.2, 127.9, 111.7, 108.5, 107.8, 61.4, 53.0, 41.3. HRMS (ESI-TOF)  $m/z$ :  $[\text{M} + \text{H}]^+$  Calcd for  $\text{C}_{22}\text{H}_{22}\text{NO}_3$  348.1594; Found 348.1583.

**3-((benzyl(methyl)amino)methyl)-[1,1'-biphenyl]-4-ol (3n):**

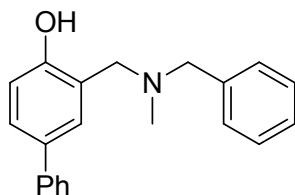

Colourless liquid (0.261 g, 86%).  $^1\text{H}$  NMR (300 MHz,  $\text{CDCl}_3$ ): 7.51 (d,  $J = 7.5$  Hz, 2H), 7.43-7.22 (m, 10H), 6.91 (d,  $J = 8.4$  Hz, 1H), 3.80 (s, 2H), 3.62 (s, 2H), 2.26 (s, 3H).  $^{13}\text{C}$  NMR (75 MHz,  $\text{CDCl}_3$ ):  $\delta$  157.5, 141.0, 136.8, 132.3, 129.4, 128.7, 128.6, 127.7, 127.5, 127.3, 126.6, 126.5, 122.1, 116.5, 61.5, 61.1, 41.4. HRMS (ESI-TOF)  $m/z$ :  $[\text{M} + \text{H}]^+$  Calcd for  $\text{C}_{21}\text{H}_{22}\text{NO}$  304.1696; Found 304.1697.

**3-(((4-chlorobenzyl)(methyl)amino)methyl)-[1,1'-biphenyl]-4-ol (3o):**

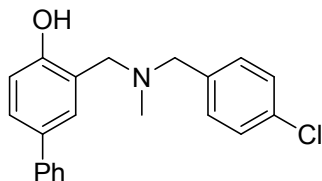

Colourless liquid (0.283 g, 84%).  $^1\text{H}$  NMR (300 MHz,  $\text{CDCl}_3$ ): 7.56-7.53 (m, 2H), 7.47-7.39 (m, 3H), 7.36-7.32 (m, 3H), 7.31-7.25 (m, 3H), 6.94 (d,  $J = 8.4$  Hz, 1H), 3.83 (s, 2H), 3.61 (s, 2H), 2.29 (s, 3H).  $^{13}\text{C}$  NMR (75 MHz,  $\text{CDCl}_3$ ):  $\delta$  157.4, 140.9, 135.3, 133.6, 132.5, 130.7, 128.8, 128.7, 127.6, 127.3, 126.6, 126.5, 121.9, 116.5, 61.1, 60.7, 41.4. HRMS (ESI-TOF)  $m/z$ :  $[\text{M} + \text{H}]^+$  Calcd for  $\text{C}_{21}\text{H}_{21}\text{ClNO}$  338.1306; Found 338.1306.



**3-((methyl(4-methylbenzyl)amino)methyl)-[1,1'-biphenyl]-4-ol (3p):**

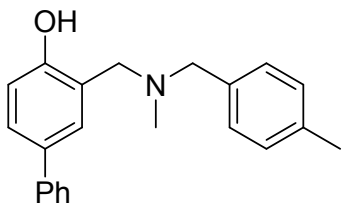

Colourless liquid (0.276 g, 87%),  $^1\text{H}$  NMR (300 MHz,  $\text{CDCl}_3$ ): 7.57 (d,  $J = 8.1$  Hz, 2H), 7.47-7.42 (m, 3H), 7.35-7.19 (m, 6H), 6.97 (d,  $J = 8.4$  Hz, 1H), 3.84 (s, 2H), 3.64 (s, 2H), 2.39 (s, 3H), 2.31 (s, 3H).  $^{13}\text{C}$  NMR (75 MHz,  $\text{CDCl}_3$ ),  $\delta$  157.6, 141.1, 137.4, 133.7, 132.3, 129.4, 129.3, 128.7, 127.4, 127.2, 126.6, 126.5, 122.2, 116.5, 61.2, 60.9, 41.3, 21.2. HRMS (ESI-TOF)  $m/z$ :  $[\text{M} + \text{H}]^+$  Calcd for  $\text{C}_{22}\text{H}_{24}\text{NO}$  318.1852; Found 318.1861.

**1-((benzyl(methyl)amino)methyl)naphthalen-2-ol (5a):**

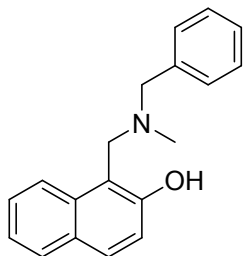

Yellow solid (0.20 g, 72%). m.p. 118-120  $^\circ\text{C}$ .  $^1\text{H}$  NMR (300 MHz,  $\text{CDCl}_3$ ): 7.86 (d,  $J = 8.7$  Hz, 1H), 7.78 (d,  $J = 8.1$  Hz, 1H), 7.71 (d,  $J = 9.0$  Hz, 1H), 7.49-7.43 (m, 1H), 7.41-7.29 (m, 6H), 7.15 (d,  $J = 9.0$  Hz, 1H), 4.22 (s, 2H), 3.72 (s, 2H), 2.35 (s, 3H).  $^{13}\text{C}$  NMR (75 MHz,  $\text{CDCl}_3$ ),  $\delta$  156.6, 136.7, 132.6, 129.4, 129.3, 128.9, 128.7, 128.6, 127.8, 126.3, 122.4, 121.0, 119.2, 111.5, 61.6, 55.8, 41.5. HRMS (ESI-TOF)  $m/z$ :  $[\text{M} + \text{H}]^+$  Calcd for  $\text{C}_{19}\text{H}_{20}\text{NO}$  278.1539; Found 278.1533.

**1-((methyl(4-methylbenzyl)amino)methyl)naphthalen-2-ol (5b):**

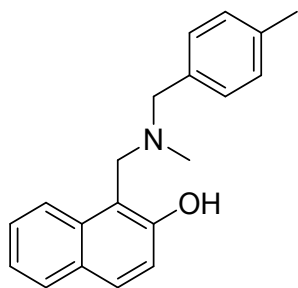

Yellow solid (0.218 g, 75%). m.p. 114-116  $^\circ\text{C}$ .  $^1\text{H}$  NMR (300 MHz,  $\text{CDCl}_3$ ): 7.75 (d,  $J = 8.7$  Hz, 1H), 7.68 (d,  $J = 8.4$  Hz, 1H), 7.61 (d,  $J = 9.6$  Hz, 1H), 7.35 (t,  $J = 7.2$  Hz, 1H), 7.22-7.13 (m, 3H), 7.09-7.03 (m, 3H), 4.11 (s, 2H), 3.59 (s, 2H), 2.26 (s, 3H), 2.25 (s, 3H).  $^{13}\text{C}$  NMR (75 MHz,  $\text{CDCl}_3$ ),  $\delta$  156.6, 137.4, 133.6, 132.7, 129.4, 129.3, 129.2, 128.9, 128.5, 126.3,

122.4, 121.0, 119.2, 111.5, 61.3, 55.6, 41.4, 21.1.  
 HRMS (ESI-TOF)  $m/z$ :  $[M + H]^+$  Calcd for  $C_{20}H_{22}NO$  292.1696; Found 292.1710.

**1-(((4-methoxybenzyl)(methyl)amino)methyl)naphthalen-2-ol (5c):**

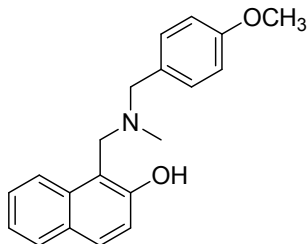

Yellow solid (0.240 g, 78%). m.p. 98-100 °C.  $^1H$  NMR (400 MHz,  $CDCl_3$ ): 7.89 (d,  $J = 8.4$  Hz, 1H), 7.83 (d,  $J = 8.0$  Hz, 1H), 7.76 (d,  $J = 8.4$  Hz, 1H), 7.51 (t,  $J = 7.2$  Hz, 1H), 7.37-7.31 (m, 3H), 7.20 (d,  $J = 8.8$  Hz, 1H), 6.95 (d,  $J = 8.4$  Hz, 2H), 4.24 (s, 2H), 3.86 (s, 3H), 3.70 (s, 2H), 2.38 (s, 3H).  $^{13}C$  NMR (75 MHz,  $CDCl_3$ ),  $\delta$  159.1, 156.5, 132.6, 130.6, 129.1, 128.9, 128.6, 128.4, 126.2, 122.4, 120.9, 119.1, 113.9, 111.4, 60.8, 55.4, 55.2, 41.3. HRMS (ESI-TOF)  $m/z$ :  $[M + H]^+$  Calcd for  $C_{20}H_{22}NO_2$  308.1645; Found 308.1645.

**1-(((2-chlorobenzyl)(methyl)amino)methyl)naphthalen-2-ol (5d):**

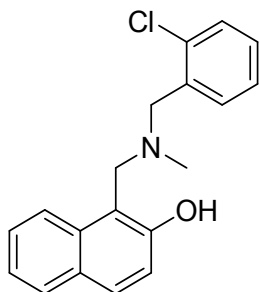

Yellow solid (0.218 g, 70%). m.p. 113-115 °C.  $^1H$  NMR (300 MHz,  $CDCl_3$ ): 7.87 (d,  $J = 9.0$  Hz, 1H), 7.76 (d,  $J = 8.1$  Hz, 1H), 7.68 (d,  $J = 8.7$  Hz, 1H), 7.48-7.41 (m, 3H), 7.32-7.25 (m, 3H), 7.10 (d,  $J = 9.0$  Hz), 4.23 (s, 2H), 3.86 (s, 2H), 2.34 (s, 3H).  $^{13}C$  NMR (75 MHz,  $CDCl_3$ ),  $\delta$  156.3, 134.9, 134.4, 132.9, 132.6, 131.6, 129.9, 129.2, 128.9, 128.5, 127.0, 126.3, 122.4, 120.9, 119.1, 111.4, 59.1, 55.5, 41.4. HRMS (ESI-TOF)  $m/z$ :  $[M + H]^+$  Calcd for  $C_{19}H_{19}ClNO$  312.1150; Found 312.1156.

**1-(((3-chlorobenzyl)(methyl)amino)methyl)naphthalen-2-ol (5e):**

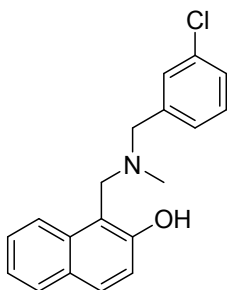

Yellow viscous liquid (0.224 g, 72%).  $^1\text{H}$  NMR (300 MHz,  $\text{CDCl}_3$ ): 7.86 (d,  $J = 8.4$  Hz, 1H), 7.80 (d,  $J = 8.1$  Hz, 1H), 7.74 (d,  $J = 9.0$  Hz, 1H), 7.48 (t,  $J = 8.1$  Hz, 1H), 7.35-7.30 (m, 4H), 7.26 (d,  $J = 4.2$  Hz, 1H), 7.18 (d,  $J = 8.7$  Hz, 1H), 4.21 (s, 2H), 3.66 (s, 2H), 2.35 (s, 3H).  $^{13}\text{C}$  NMR (75 MHz,  $\text{CDCl}_3$ ),  $\delta$  156.5, 138.8, 134.5, 132.7, 130.1, 129.6, 129.5, 129.0, 128.7, 128.0, 127.6, 126.5, 122.6, 121.0, 119.2, 111.4, 60.9, 55.8, 41.6. HRMS (ESI-TOF)  $m/z$ :  $[\text{M} + \text{H}]^+$  Calcd for  $\text{C}_{19}\text{H}_{19}\text{ClNO}$  312.1150; Found 312.1153.

**1-(((4-chlorobenzyl)(methyl)amino)methyl)naphthalen-2-ol (5f):**

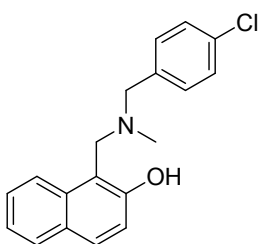

Yellow solid (0.233 g, 75%). m.p. 100-102  $^{\circ}\text{C}$ .  $^1\text{H}$  NMR (300 MHz,  $\text{CDCl}_3$ ): 7.84 (d,  $J = 8.4$  Hz, 1H), 7.78 (d,  $J = 8.1$  Hz, 1H), 7.72 (d,  $J = 9.0$  Hz, 1H), 7.47 (td,  $J_1 = 8.7$  Hz,  $J_2 = 1.5$  Hz, 1H), 7.36-7.26 (m, 5H), 7.15 (d,  $J = 8.7$  Hz, 1H), 4.20 (s, 2H), 3.66 (s, 2H), 2.34 (s, 3H).  $^{13}\text{C}$  NMR (75 MHz,  $\text{CDCl}_3$ ),  $\delta$  156.4, 135.1, 133.6, 132.6, 130.7, 129.4, 128.9, 128.8, 128.6, 126.4, 122.5, 120.9, 119.1, 111.3, 60.7, 55.7, 41.5. HRMS (ESI-TOF)  $m/z$ :  $[\text{M} + \text{H}]^+$  Calcd for  $\text{C}_{19}\text{H}_{19}\text{ClNO}$  312.1150; Found 312.1165.

**1-(((4-bromobenzyl)(methyl)amino)methyl)naphthalen-2-ol (5g):**

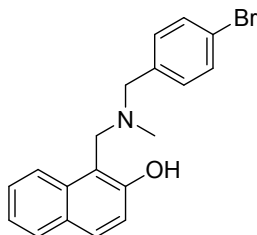

Yellow solid (0.27 g, 76%). m.p. 108-110  $^{\circ}\text{C}$ .  $^1\text{H}$  NMR (300 MHz,  $\text{CDCl}_3$ ): 7.83 (d,  $J = 8.4$  Hz, 1H), 7.77 (d,  $J = 7.5$  Hz, 1H), 7.71 (d,  $J = 8.7$  Hz, 1H), 7.50-7.42 (m, 3H), 7.31 (d,  $J = 7.8$  Hz, 1H), 7.21 (d,  $J = 8.4$  Hz, 2H), 7.13 (d,  $J = 9.0$  Hz, 1H), 4.19 (s, 2H), 3.64 (s, 2H), 2.33 (s, 3H).  $^{13}\text{C}$  NMR (75 MHz,  $\text{CDCl}_3$ ),  $\delta$  156.4, 135.6, 132.5, 131.8, 131.1, 129.4, 128.9, 128.5, 126.4, 122.5, 121.7, 120.9, 119.1, 111.3,

60.7, 55.7, 41.5. HRMS (ESI-TOF)  $m/z$ :  $[M + H]^+$   
Calcd for  $C_{19}H_{19}BrNO$  356.0645; Found 356.0648.

**4-(((2-hydroxynaphthalen-1-yl)methyl)(methyl)amino)methyl)benzonitrile (5h):**

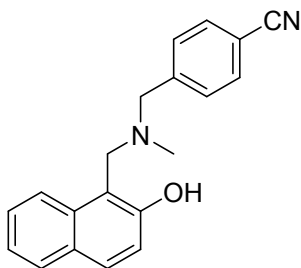

Yellow solid (0.242 g, 80%). m.p. 104-106 °C.  $^1H$  NMR (300 MHz,  $CDCl_3$ ): 7.81 (d,  $J = 8.7$  Hz, 1H), 7.76 (d,  $J = 7.8$  Hz, 1H), 7.70 (d,  $J = 9.0$  Hz, 1H), 7.62 (d,  $J = 8.1$  Hz, 2H), 7.47-7.40 (m, 3H), 7.29 (t,  $J = 7.2$  Hz, 1H), 7.12 (d,  $J = 8.7$  Hz, 1H), 4.19 (s, 2H), 3.68 (s, 2H), 2.33 (s, 3H).  $^{13}C$  NMR (75 MHz,  $CDCl_3$ ),  $\delta$  156.2, 142.3, 132.4, 129.9, 129.6, 129.0, 128.6, 126.5, 122.6, 120.9, 119.0, 118.6, 111.7, 111.2, 60.9, 55.9, 41.8. HRMS (ESI-TOF)  $m/z$ :  $[M + H]^+$  Calcd for  $C_{20}H_{19}N_2O$  303.1492; Found 303.1478.

**6-bromo-1-(((2-chlorobenzyl)(methyl)amino)methyl)naphthalen-2-ol (5i):**

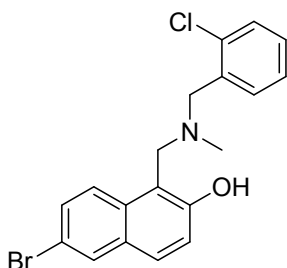

Yellow viscous liquid (0.307 g, 79%).  $^1H$  NMR (300 MHz,  $CDCl_3$ ): 7.89 (d,  $J = 2.1$  Hz, 1H), 7.731 (d,  $J = 9.6$  Hz, 1H), 7.57 (d,  $J = 9.3$  Hz, 1H), 7.49 (dd,  $J_1 = 9.45$  Hz,  $J_2 = 1.5$  Hz, 1H), 7.44-7.37 (m, 2H), 7.29-7.24 (m, 2H), 7.11 (d,  $J = 9.0$  Hz, 1H) 4.18 (s, 2H), 3.84 (s, 2H), 2.33 (s, 3H).  $^{13}C$  NMR (75 MHz,  $CDCl_3$ ),  $\delta$  156.6, 134.9, 134.2, 131.6, 131.1, 130.6, 130.0, 129.7, 129.4, 129.3, 128.3, 127.0, 122.8, 120.2, 115.9, 111.7, 59.1, 55.4, 41.4. HRMS (ESI-TOF)  $m/z$ :  $[M + H]^+$  Calcd for  $C_{19}H_{18}BrClNO$  390.0255; Found 390.269.

**6-bromo-1-(((4-chlorobenzyl)(methyl)amino)methyl)naphthalen-2-ol (5j):**

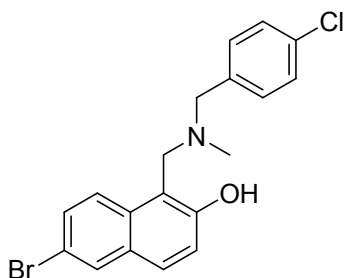

Yellow solid (0.276 g, 71%). m.p. 108-110 °C.  $^1\text{H}$  NMR (300 MHz,  $\text{CDCl}_3$ ): 7.89 (d,  $J = 2.1$  Hz, 1H), 7.68 (d,  $J = 8.7$  Hz, 1H), 7.59 (d,  $J = 9.0$  Hz, 1H), 7.49 (dd,  $J_1 = 9.15$ ,  $J_2 = 2.4$  Hz, 1H), 7.32 (d,  $J = 8.4$  Hz, 2H), 7.24 (d,  $J = 8.1$  Hz, 2H), 7.12 (d,  $J = 9.0$  Hz, 1H), 4.14 (s, 2H), 3.64 (s, 2H), 2.32 (s, 3H).  $^{13}\text{C}$  NMR (75 MHz,  $\text{CDCl}_3$ ),  $\delta$  156.8, 134.8, 133.7, 131.1, 130.7, 130.1, 129.8, 129.5, 128.9, 128.5, 122.7, 120.2, 116.0, 111.6, 60.7, 55.6, 41.5. HRMS (ESI-TOF)  $m/z$ :  $[\text{M} + \text{H}]^+$  Calcd for  $\text{C}_{19}\text{H}_{18}\text{BrClNO}$  390.0255; Found 390.0268.

**1-((benzyl(methyl)amino)methyl)-7-methoxynaphthalen-2-ol (5k):**

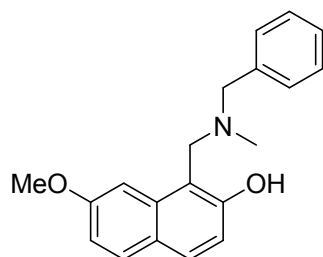

Yellow viscous liquid (0.246 g, 80%).  $^1\text{H}$  NMR (300 MHz,  $\text{CDCl}_3$ ): 7.69 (d,  $J = 9.3$  Hz, 1H), 7.64 (d,  $J = 8.7$  Hz, 1H), 7.41-7.32 (m, 5H), 7.13 (d,  $J = 2.1$  Hz, 1H), 7.02-6.98 (m, 2H), 4.16 (s, 2H), 3.95 (s, 3H), 3.73 (s, 2H), 2.37 (s, 3H).  $^{13}\text{C}$  NMR (75 MHz  $\text{CDCl}_3$ ),  $\delta$  158.3, 157.2, 136.6, 133.8, 130.4, 129.4, 129.0, 128.6, 127.7, 123.9, 116.7, 114.1, 110.5, 100.8, 61.4, 55.9, 55.3, 41.5. HRMS (ESI-TOF)  $m/z$ :  $[\text{M} + \text{H}]^+$  Calcd for  $\text{C}_{20}\text{H}_{22}\text{NO}_2$  308.1645; Found 308.1645.

**3-((benzyl(methyl)amino)methyl)-2-chloropyridin-4-ol (7a):**

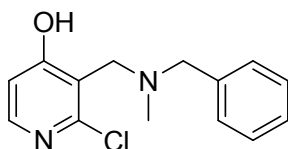

Colourless liquid (0.218 g, 83%).  $^1\text{H}$  NMR (300 MHz,  $\text{CDCl}_3$ ): 8.05 (d,  $J = 5.7$  Hz, 1H), 7.41-7.30 (m, 5H), 6.68 (d,  $J = 5.7$  Hz, 1H), 3.97 (s, 2H), 3.68 (s, 2H), 2.34 (s, 3H).  $^{13}\text{C}$  NMR (75 MHz,  $\text{CDCl}_3$ ),  $\delta$  167.6, 150.0, 149.1, 135.5, 129.5, 128.9, 128.2, 115.2, 112.1,

61.5, 57.0, 41.5. HRMS (ESI-TOF)  $m/z$ :  $[M + H]^+$   
Calcd for  $C_{14}H_{16}ClN_2O$  263.0946; Found 263.0950.

**2-chloro-3-((methyl(4-methylbenzyl)amino)methyl)pyridin-4-ol (7b):**

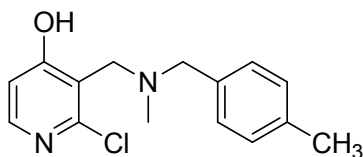

Colourless liquid (0.235 g, 85%).  $^1H$  NMR (300 MHz,  $CDCl_3$ ): 8.06 (d,  $J = 5.4$  Hz, 1H), 7.21 (m, 4H), 6.68 (d,  $J = 5.4$  Hz, 1H), 3.97 (s, 2H), 3.66 (s, 2H), 2.37 (s, 3H), 2.34 (s, 3H).  $^{13}C$  NMR (75 MHz,  $CDCl_3$ ),  $\delta$  167.7, 150.0, 149.0, 138.0, 132.4, 129.5, 129.4, 115.2, 112.1, 61.1, 56.8, 41.4, 21.1. HRMS (ESI-TOF)  $m/z$ :  $[M + H]^+$  Calcd for  $C_{15}H_{18}ClN_2O$  277.1102; Found 277.1102.

**2-chloro-3-(((2-chlorobenzyl)(methyl)amino)methyl)pyridin-4-ol (7c):**

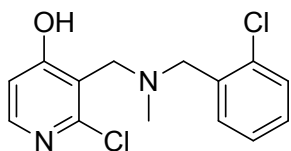

Colourless liquid (0.214 g, 72%).  $^1H$  NMR (300 MHz,  $CDCl_3$ ): 8.05 (d,  $J = 5.7$  Hz, 1H), 7.47-7.44 (m, 1H), 7.38-7.29 (m, 3H), 6.66 (d,  $J = 5.4$  Hz, 1H), 4.01 (s, 2H), 3.83 (s, 2H), 2.36 (s, 3H).  $^{13}C$  NMR (75 MHz,  $CDCl_3$ ),  $\delta$  167.1, 150.1, 149.0, 135.0, 133.5, 131.8, 130.2, 129.8, 127.1, 115.2, 112.0, 59.2, 56.7, 41.5. HRMS (ESI-TOF)  $m/z$ :  $[M + H]^+$  Calcd for  $C_{14}H_{15}Cl_2N_2O$  297.0556; Found 297.0545.

**2-chloro-3-(((3-chlorobenzyl)(methyl)amino)methyl)pyridin-4-ol (7d):**

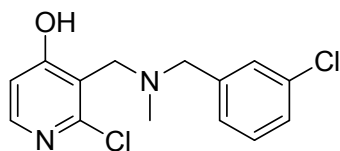

Colourless liquid (0.208 g, 70%).  $^1\text{H}$  NMR (400 MHz,  $\text{CDCl}_3$ ): 8.03 (d,  $J = 5.6$  Hz, 1H), 7.29-7.23 (m, 3H), 7.17 (s, 1H), 6.67 (d,  $J = 5.6$  Hz, 1H), 3.94 (s, 2H), 3.61 (s, 2H), 2.30 (s, 3H).  $^{13}\text{C}$  NMR (75 MHz,  $\text{CDCl}_3$ ),  $\delta$  167.3, 150.1, 149.2, 137.6, 134.7, 130.2, 129.5, 128.4, 127.5, 115.1, 112.1, 60.9, 57.1, 41.6. HRMS (ESI-TOF)  $m/z$ :  $[\text{M} + \text{H}]^+$  Calcd for  $\text{C}_{14}\text{H}_{15}\text{Cl}_2\text{N}_2\text{O}$  297.0556; Found 297.0556.

**2-chloro-3-(((4-chlorobenzyl)(methyl)amino)methyl)pyridin-4-ol (7e):**

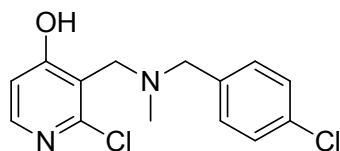

Colourless liquid (0.220 g, 74%).  $^1\text{H}$  NMR (300 MHz,  $\text{CDCl}_3$ ): 8.06 (d,  $J = 5.4$  Hz, 1H), 7.35 (d,  $J = 8.4$  Hz, 2H), 7.24 (d,  $J = 8.1$  Hz, 2H), 6.68 (d,  $J = 5.7$  Hz, 1H), 3.96 (s, 2H), 3.64 (s, 2H), 2.32 (s, 3H).  $^{13}\text{C}$  NMR (75 MHz,  $\text{CDCl}_3$ ),  $\delta$  167.3, 150.1, 149.2, 134.2, 134.0, 130.8, 129.1, 115.1, 112.1, 60.7, 57.0, 41.5. HRMS (ESI-TOF)  $m/z$ :  $[\text{M} + \text{H}]^+$  Calcd for  $\text{C}_{14}\text{H}_{15}\text{Cl}_2\text{N}_2\text{O}$  297.0556; Found 297.0553.



## Crystallographic Description:

Data Collection and Refinement Single-crystal X-ray data of compounds was collected on Bruker SMART CCD Diffractometer using graphite monochromated MoK $\alpha$  radiation ( $\lambda = 0.71073$  Å). Frames were collected at T = 298 K by  $\omega$ ,  $\phi$ , and  $2\theta$ -rotations with full quadrant data collection strategy (four domains each with 600 frames) at 10s per frame with SMART. The measured intensities were reduced to F<sup>2</sup> and corrected for absorption with SADABS.<sup>4</sup> Structure solution, refinement, and data output were carried out with the SHELXTL package by direct methods.<sup>5</sup> Non-hydrogen atoms were refined anisotropically using the WinGX (version 1.80.05) program package.<sup>6</sup> All non-hydrogen atoms were refined anisotropically and hydrogen atoms were treated as riding atoms using SHELX default parameters. Molecular structures have drawn using ORTEP software shown in figure S10. Further information on the crystal structure determination (excluding structure factors) has been given as table S1 and also deposited in the Cambridge Crystallographic Data Centre as supplementary publications numbers, 1832248. Copies of the data can be obtained free of charge upon application to CCDC, 12 Union Road, Cambridge CB2 1EZ, UK (fax: (+44) 1223-336-033. e-mail: deposit@ccdc.cam.ac.uk) or via internet.

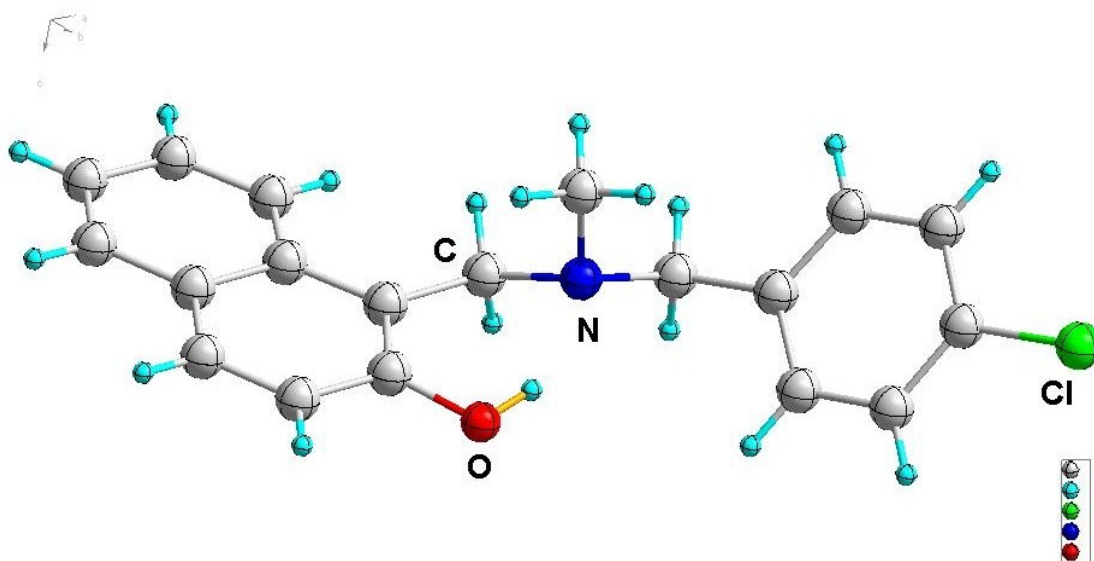

**Fig. S10** ORTEP diagram of **5f** (ellipsoid of 50% probability)

**Crystallographic description of 1-(((4-chlorobenzyl)(methyl)amino)methyl)naphthalen-2-ol (5f) (Table S1):**

|                                   |                                             |
|-----------------------------------|---------------------------------------------|
| Identification code               | <b>5f</b>                                   |
| Empirical formula                 | C <sub>19</sub> H <sub>18</sub> ClNO        |
| Formula weight                    | 311.79                                      |
| Temperature                       | 302(2) K                                    |
| Wavelength                        | 0.71073 Å                                   |
| Crystal system                    | Monoclinic                                  |
| Space group                       | C 2/c                                       |
| Unit cell dimensions              | a = 20.1159(13) Å, a = 90°.                 |
|                                   | b = 8.9951(5) Å, b = 93.382(2)°.            |
|                                   | c = 17.9253(11) Å, g = 90°.                 |
| Volume                            | 3237.8(3) Å <sup>3</sup>                    |
| Z                                 | 8                                           |
| Density (calculated)              | 1.279 Mg/m <sup>3</sup>                     |
| Absorption coefficient            | 0.237 mm <sup>-1</sup>                      |
| F(000)                            | 1312.0                                      |
| Crystal size                      | 0.33 x 0.32 x 0.29mm <sup>3</sup>           |
| Theta range for data collection   | 2.03 to 25.00°.                             |
| Index ranges                      | -22 ≤ h ≤ 22, -10 ≤ k ≤ 10, -20 ≤ l ≤ 20    |
| Reflections collected             | 16532                                       |
| Independent reflections           | 2496 [R(int) = 0.1548]                      |
| Completeness to theta = 25.00°    | 99.8 %                                      |
| Absorption correction             | Semi-empirical from equivalents             |
| Refinement method                 | Full-matrix least-squares on F <sup>2</sup> |
| Data / restraints / parameters    | 2493 / 0 / 201                              |
| Goodness-of-fit on F <sup>2</sup> | 1.134                                       |
| Final R indices [I > 2σ(I)]       | R1 = 0.0663, wR2 = 0.1633                   |
| R indices (all data)              | R1 = 0.0726, wR2 = 0.1692                   |
| Largest diff. peak and hole       | 0.293 and -0.457 e.Å <sup>-3</sup>          |
| <b>CCDC</b>                       | 1832248                                     |

## References

1. Furniss, B. S.; Hannaford, A. J.; Smith, P. W. G.; Tatchell, A. R. *Vogel's Textbook of Practical Organic Chemistry*, 5th Eds. ELBS, Longman Group U K Ltd., 1989.
2. W. S. Hummers, R. E. Offeman, *J. Am. Chem. Soc.*, 1958, **80**, 1339. b) J. Liu, H. Jeong, K. Lee, J. Y. Park, Y. H. Ahn, S. Lee, *Carbon*, 2010, **48**, 2282.
3. A. Kamal, V. Srinivasulu, J. N. S. R. C Murty, N. Shankaraiah, N. Nagesh, T. Srinivasa Reddy and A. V. S. Rao *Adv. Synth. Catal.* 2013, **355**, 2297-2307.
4. SADABS V2.10 (Sheldrick, G. M. 2003).
5. Sheldrick, G. M. *Acta Crystallogr., Sect. A: Found. Crystallogr.*, 1990, **46**, 467.
6. Sheldrick, G. M. SHELXL-NT Version 6.12, University of Gottingen, Germany, 2000.

Spectra:  $^1\text{H}$ NMR and  $^{13}\text{C}$ NMR

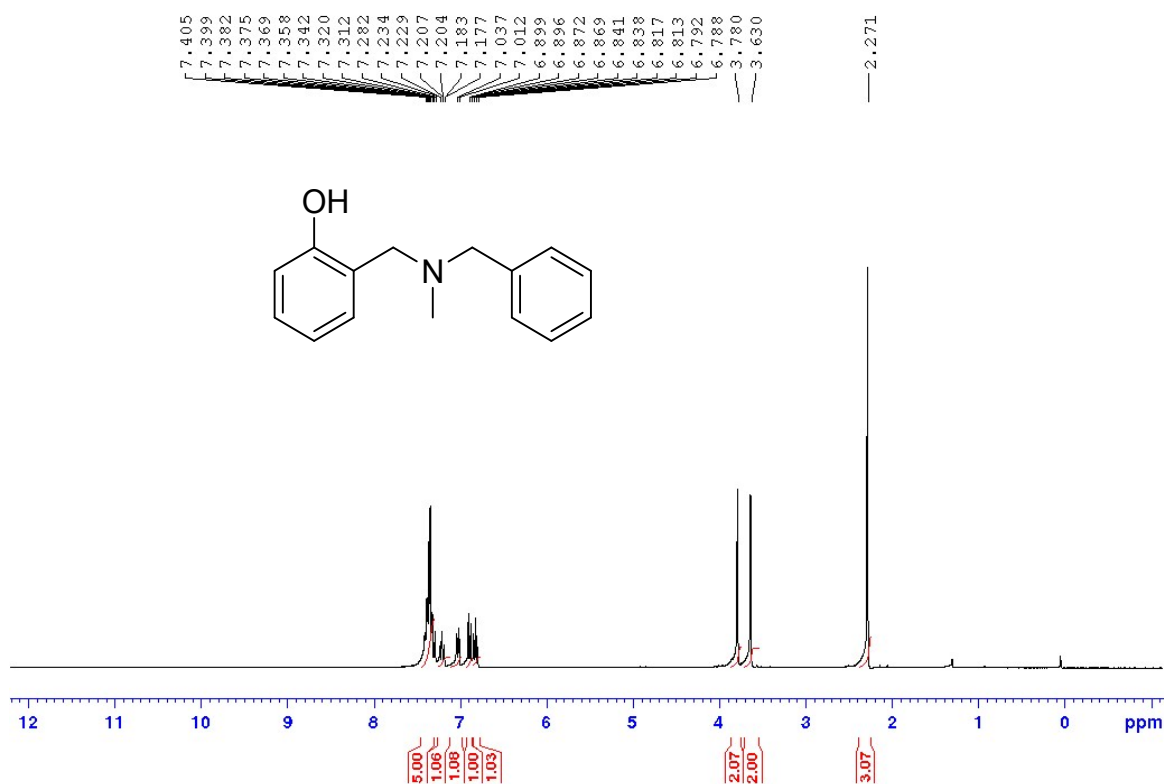

Spectrum1:  $^1\text{H}$  NMR of 3a

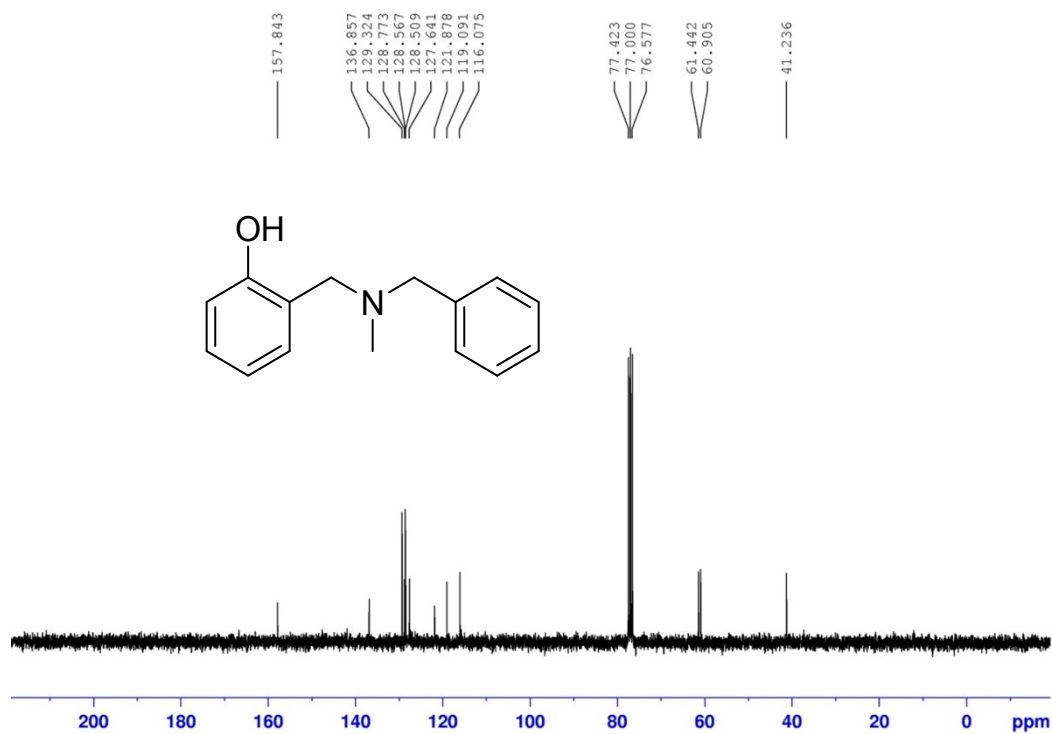

Spectrum2:  $^{13}\text{C}\{^1\text{H}\}$  NMR of 3a

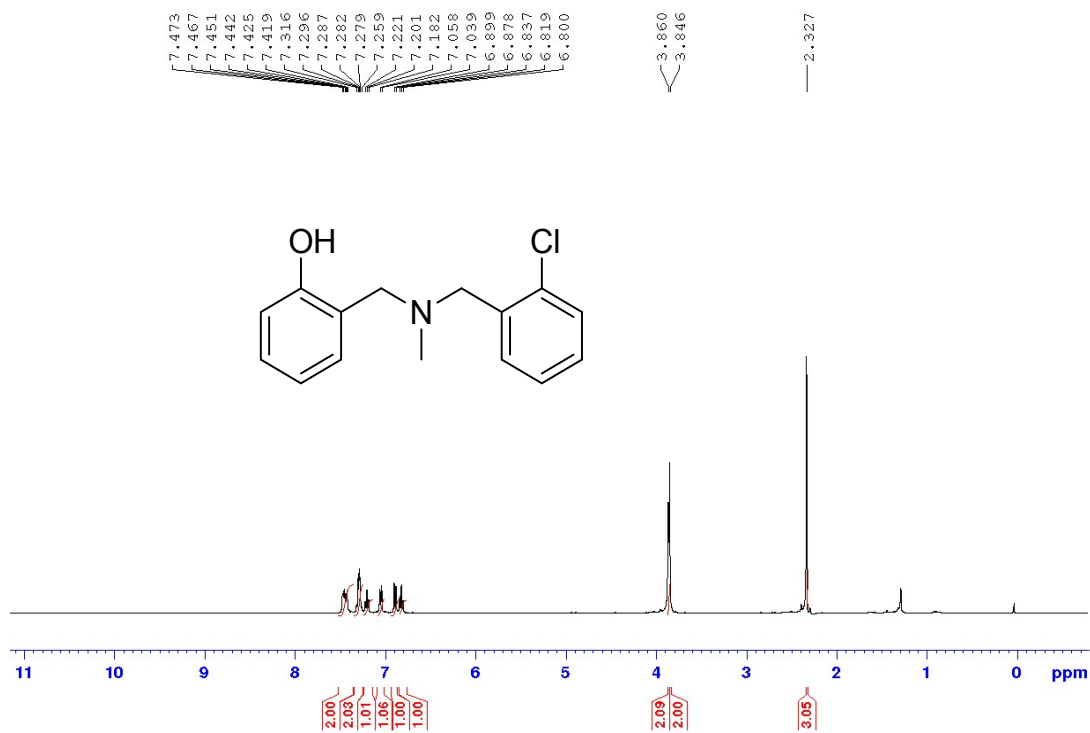

Spectrum3: <sup>1</sup>H NMR of 3b

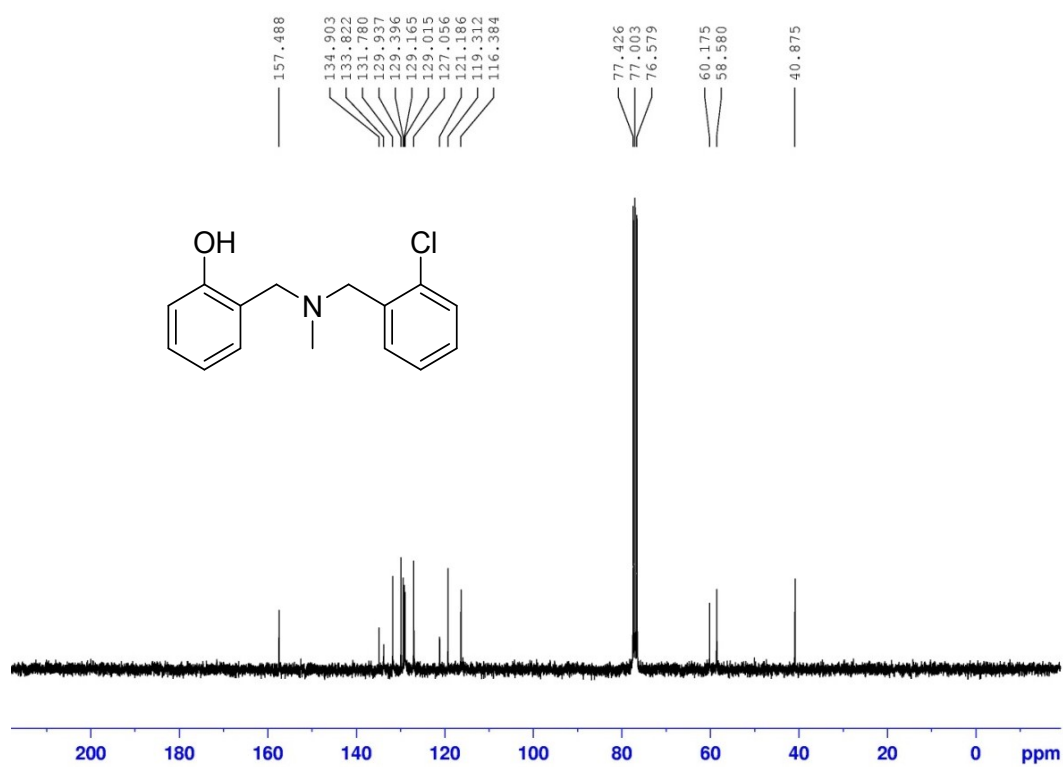

Spectrum4: <sup>13</sup>C{<sup>1</sup>H} NMR of 3b

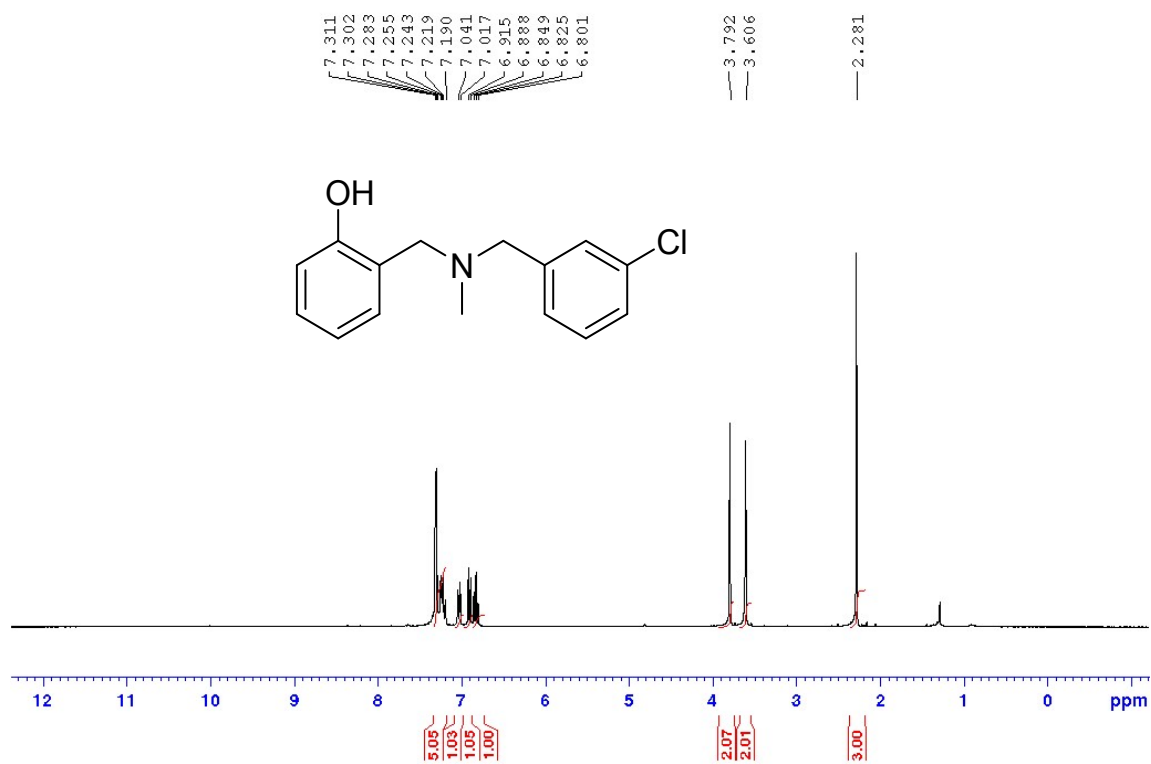

Spectrum5: <sup>1</sup>H NMR of 3c

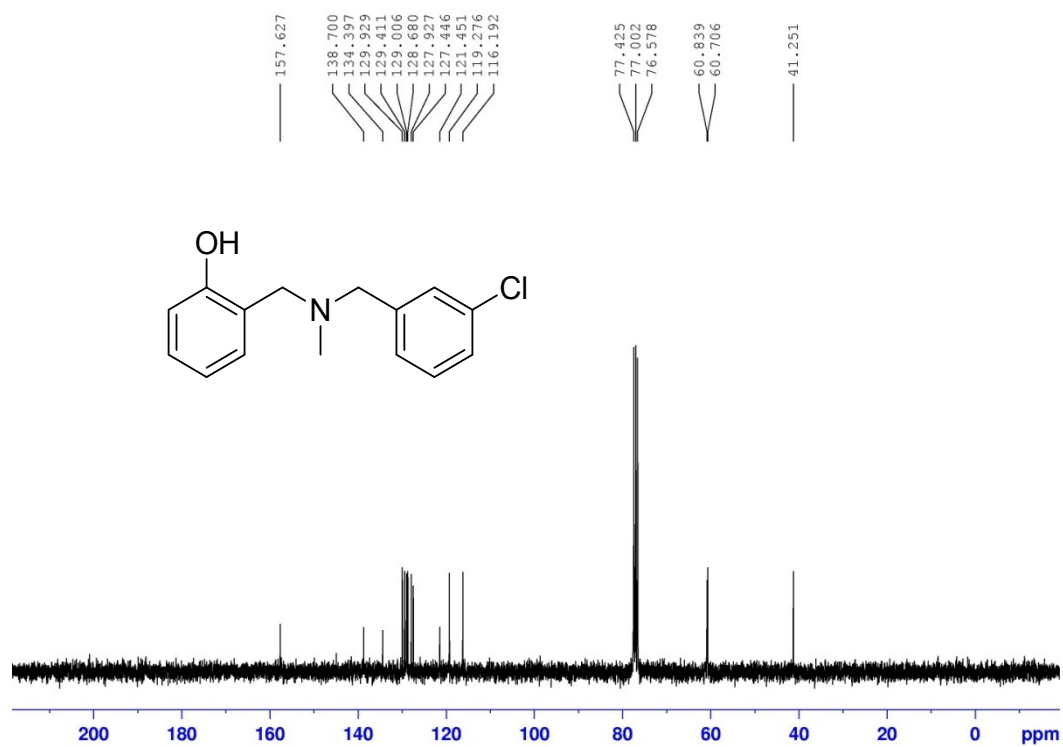

Spectrum6: <sup>13</sup>C{<sup>1</sup>H} NMR of 3c

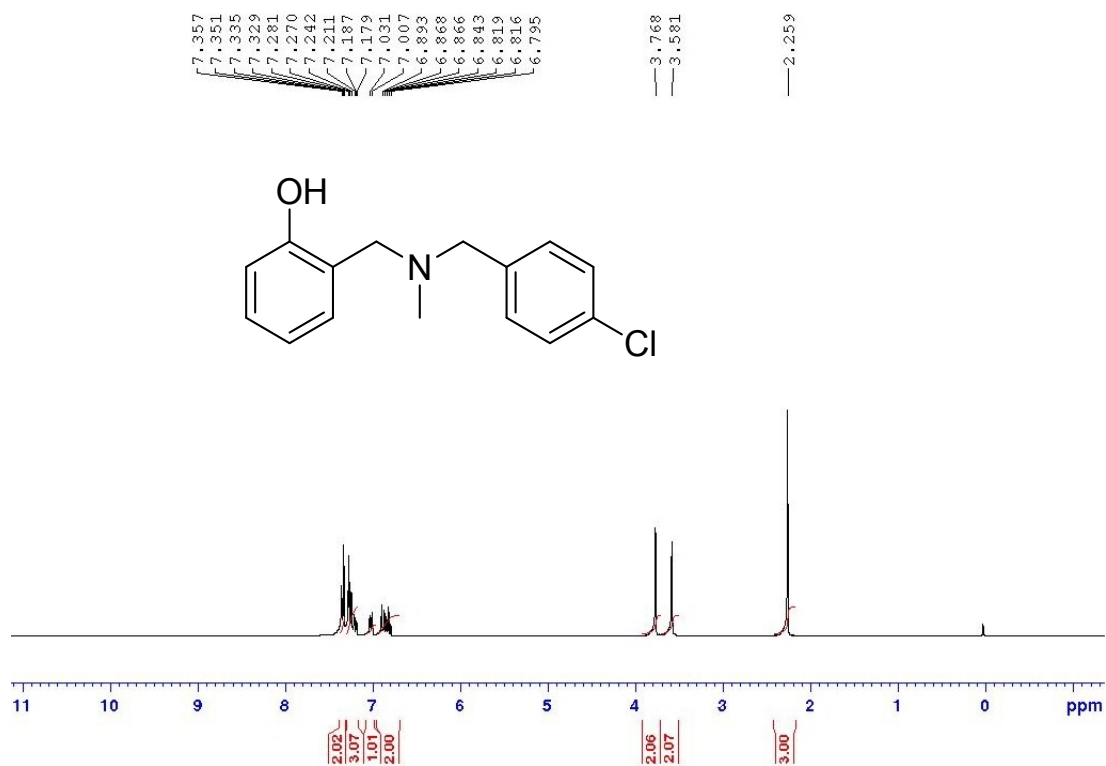

Spectrum7: <sup>1</sup>H NMR of 3d

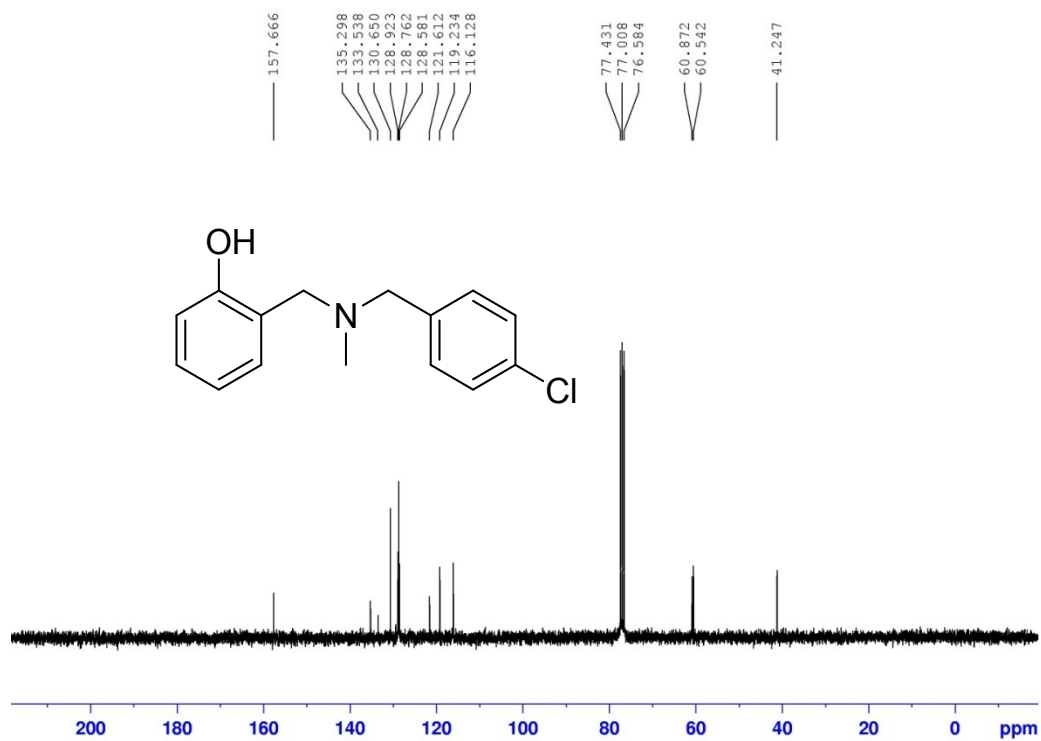

Spectrum8: <sup>13</sup>C{<sup>1</sup>H} NMR of 3d



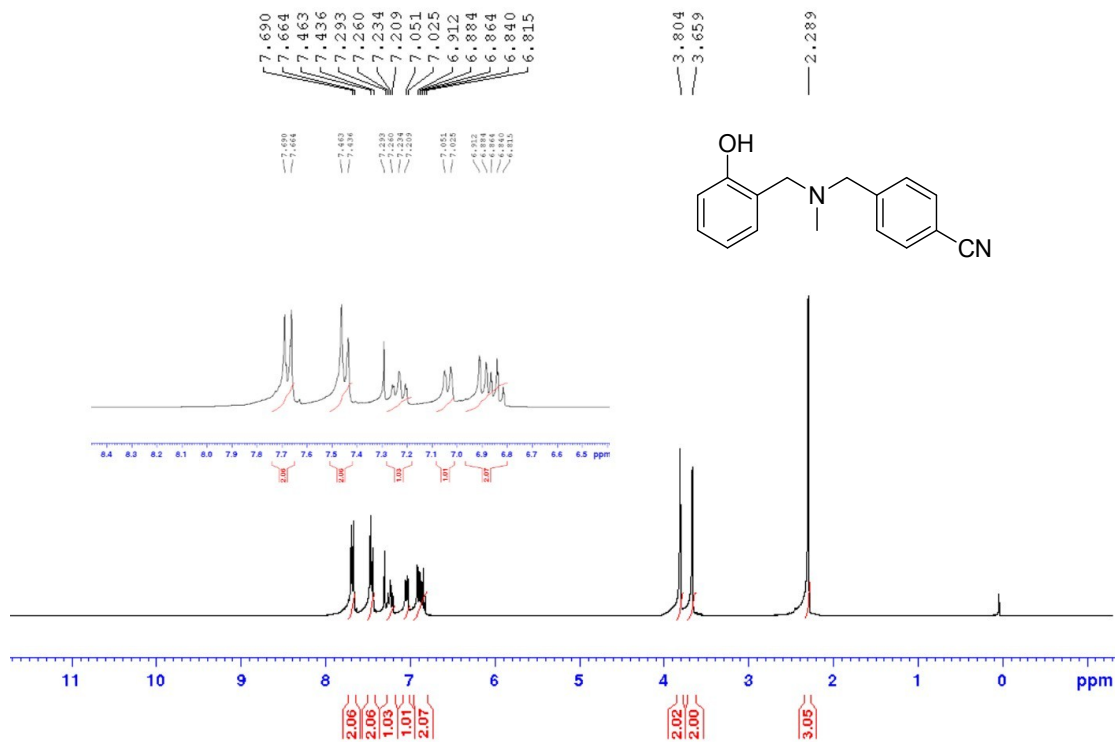

Spectrum9: <sup>1</sup>H NMR of 3e

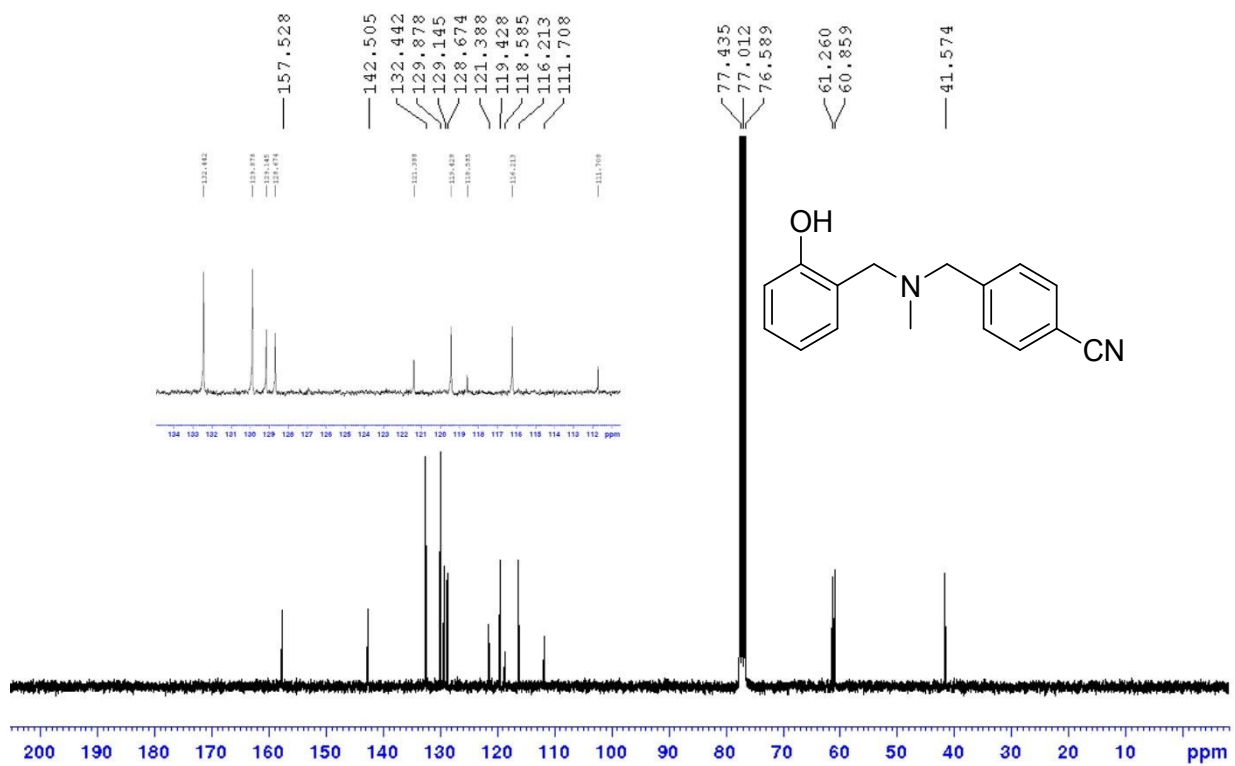

Spectrum10: <sup>13</sup>C{<sup>1</sup>H} NMR of 3e

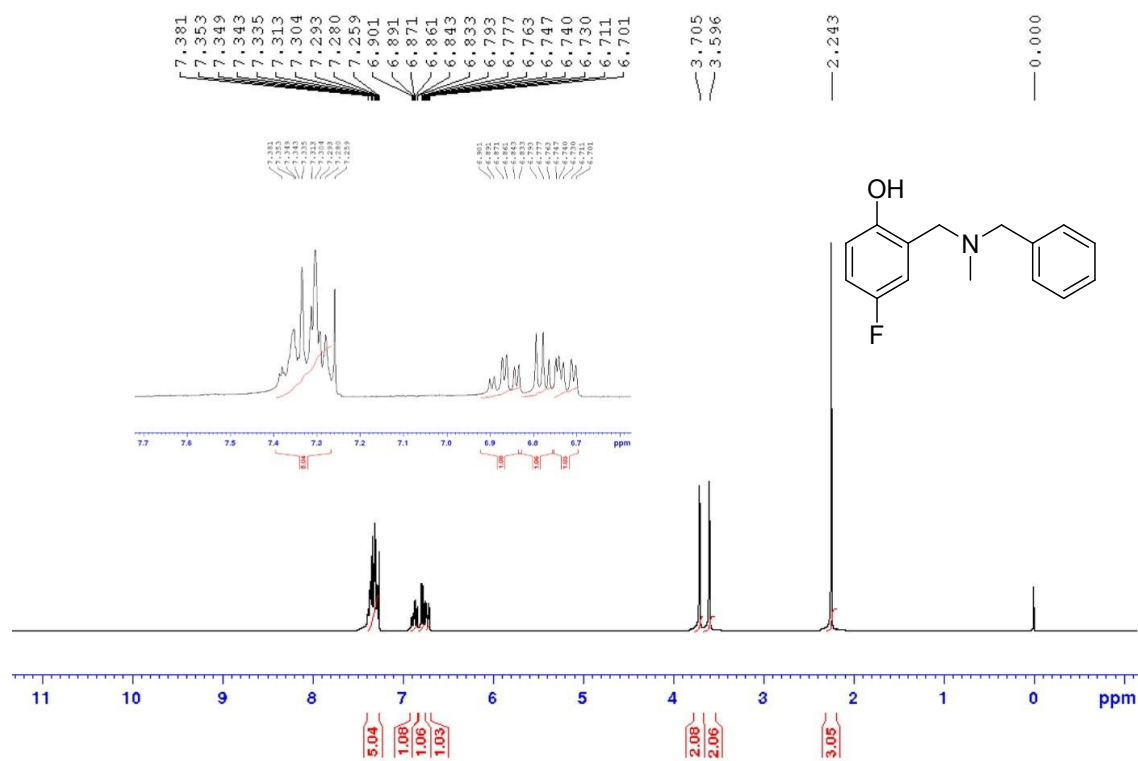

Spectrum11: <sup>1</sup>H NMR of 3f

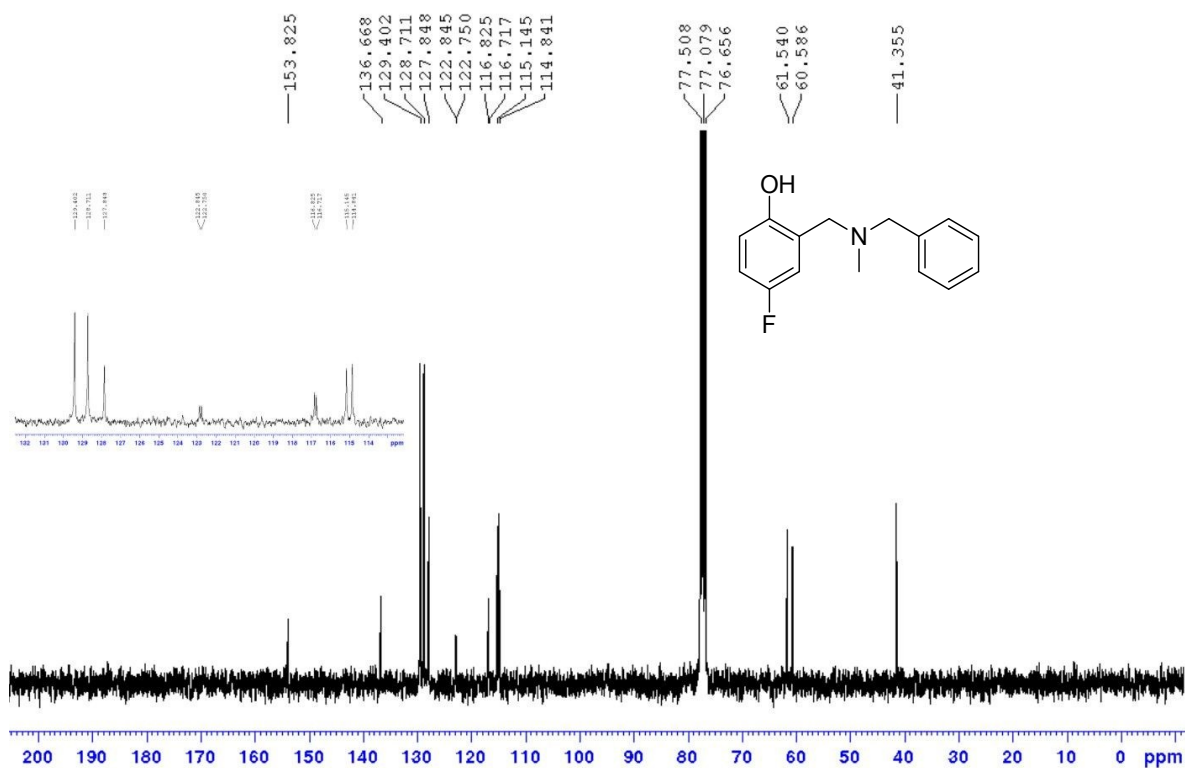

Spectrum12: <sup>13</sup>C{<sup>1</sup>H} NMR of 3f

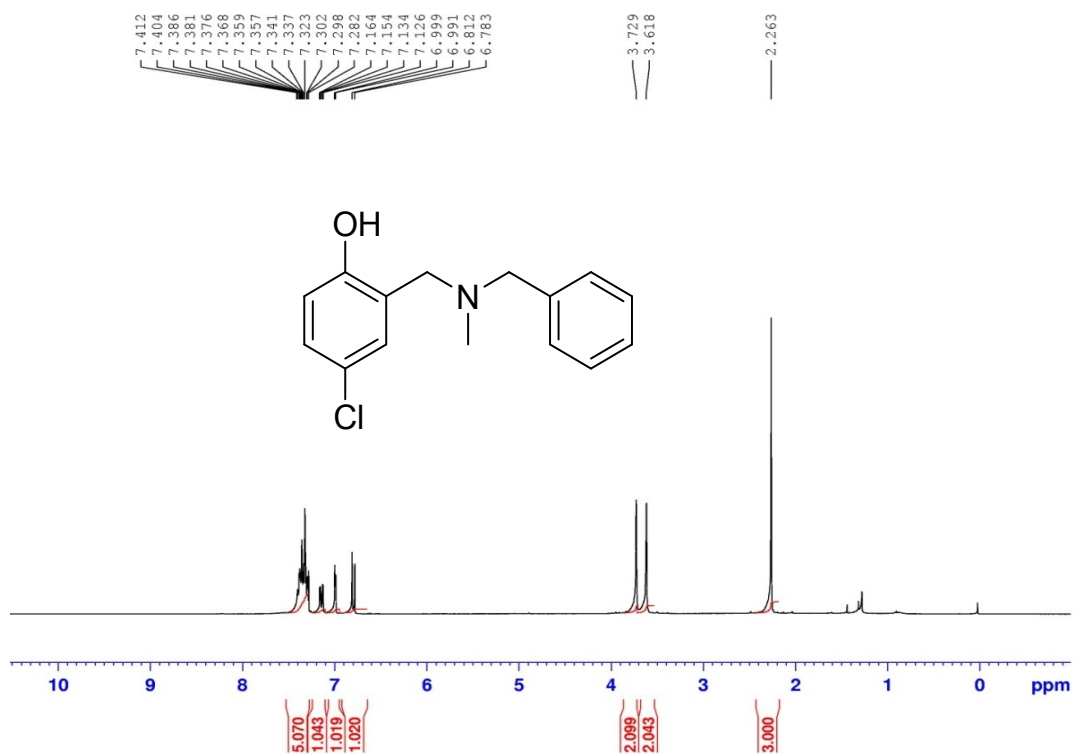

Spectrum13: <sup>1</sup>H NMR of 3g

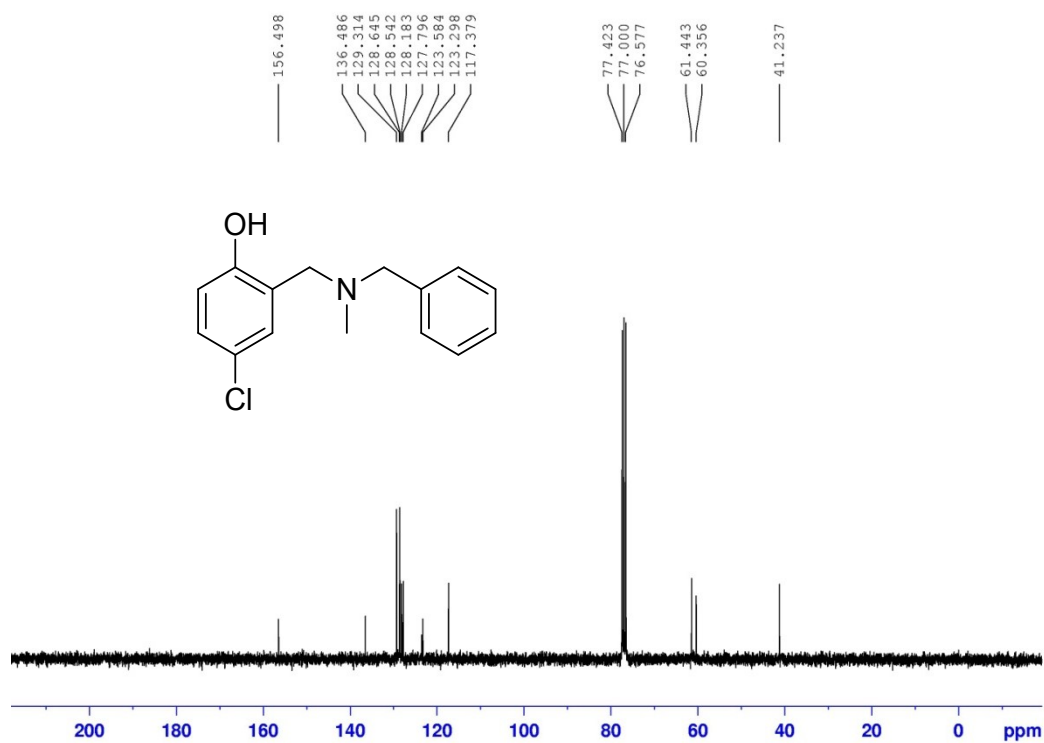

Spectrum14: <sup>13</sup>C{<sup>1</sup>H} NMR of 3g

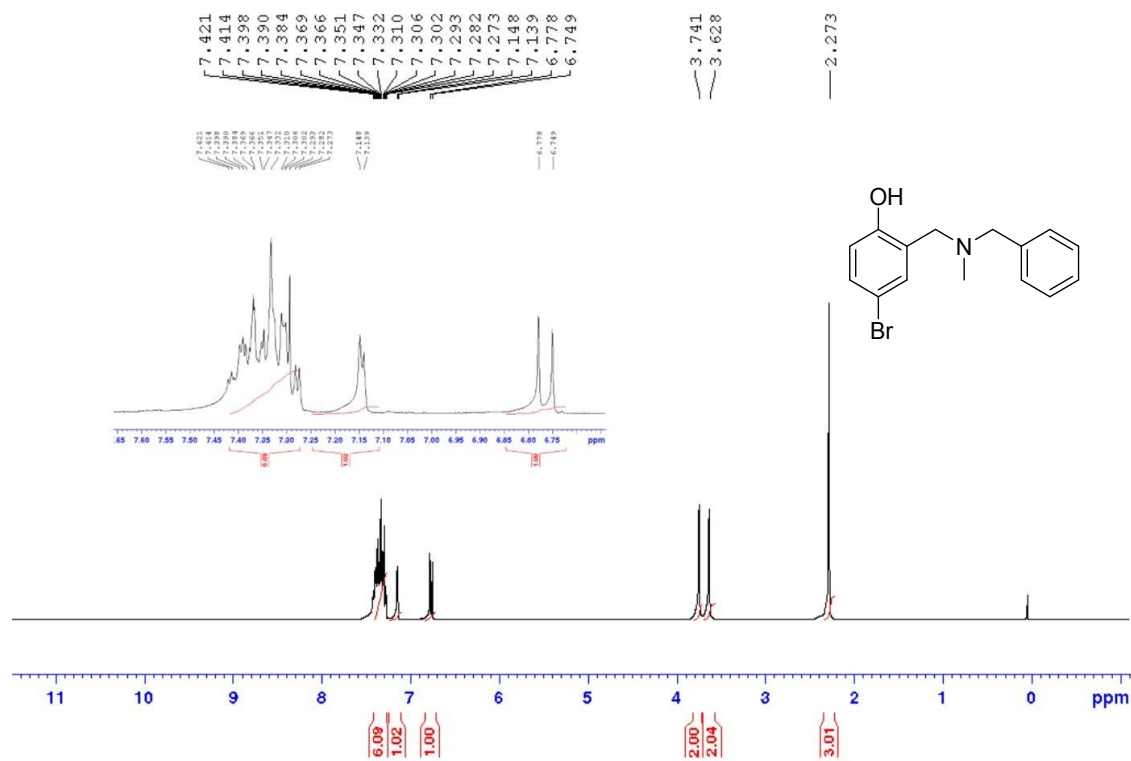

Spectrum15: <sup>1</sup>H NMR of 3h

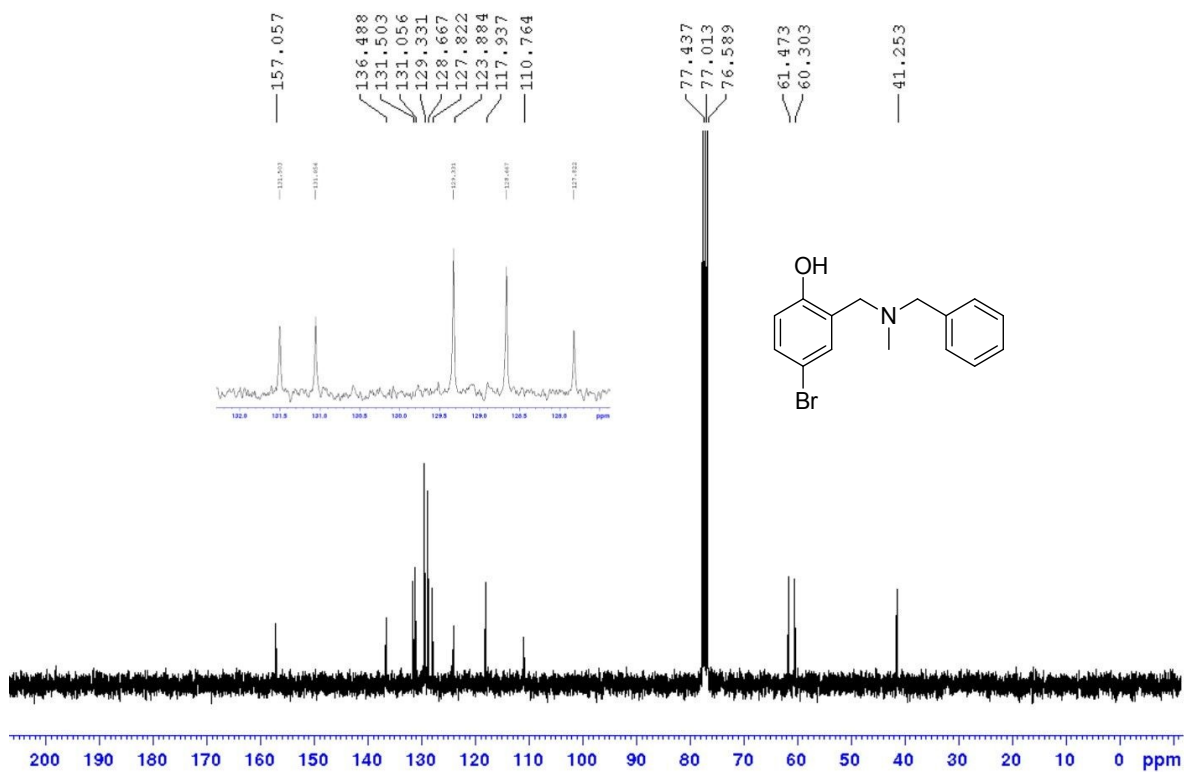

Spectrum16: <sup>13</sup>C{<sup>1</sup>H} NMR of 3h

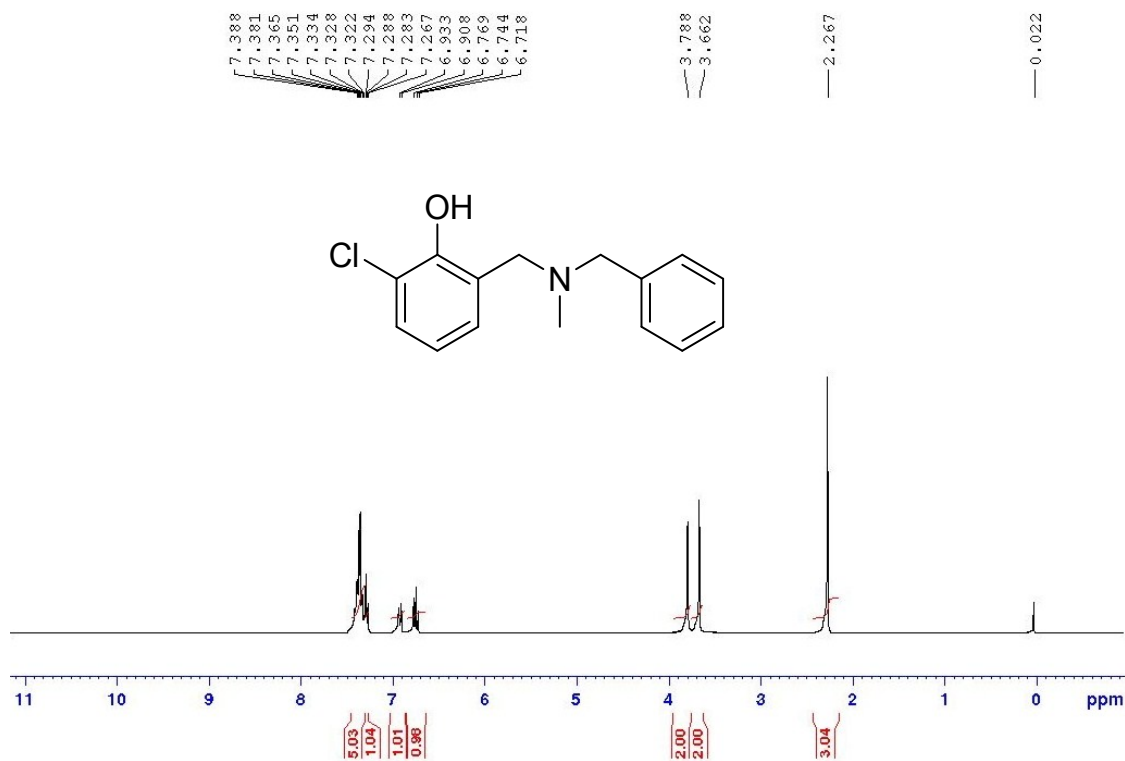

Spectrum17: <sup>1</sup>H NMR of 3i

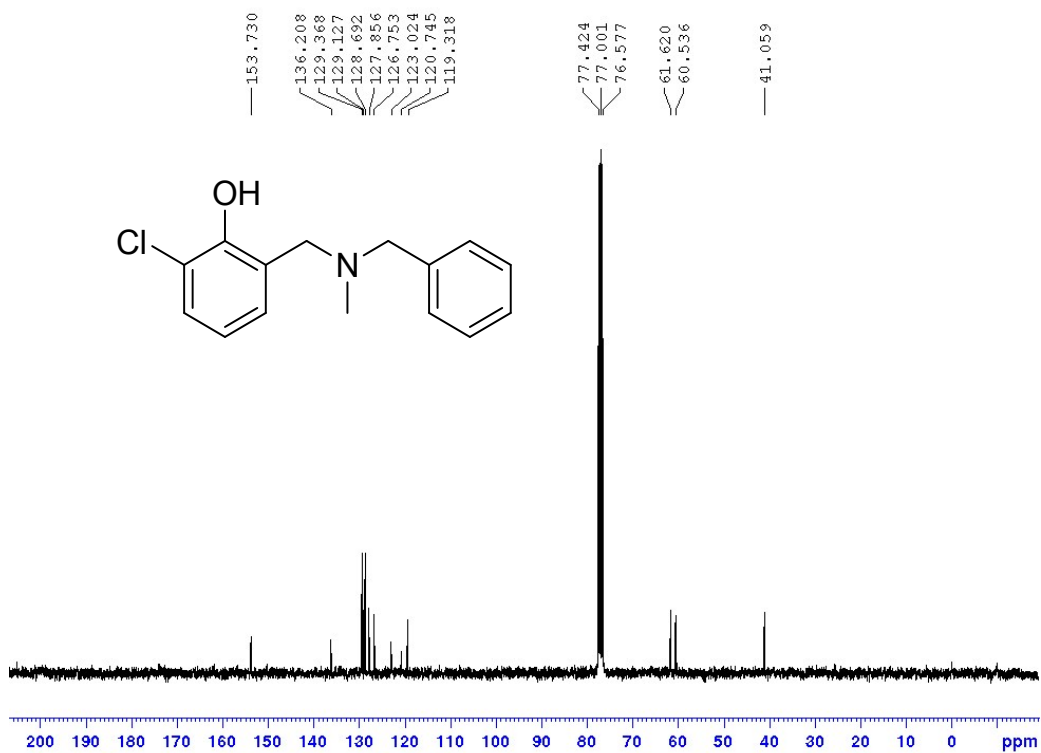

Spectrum18: <sup>13</sup>C{<sup>1</sup>H} NMR of 3i

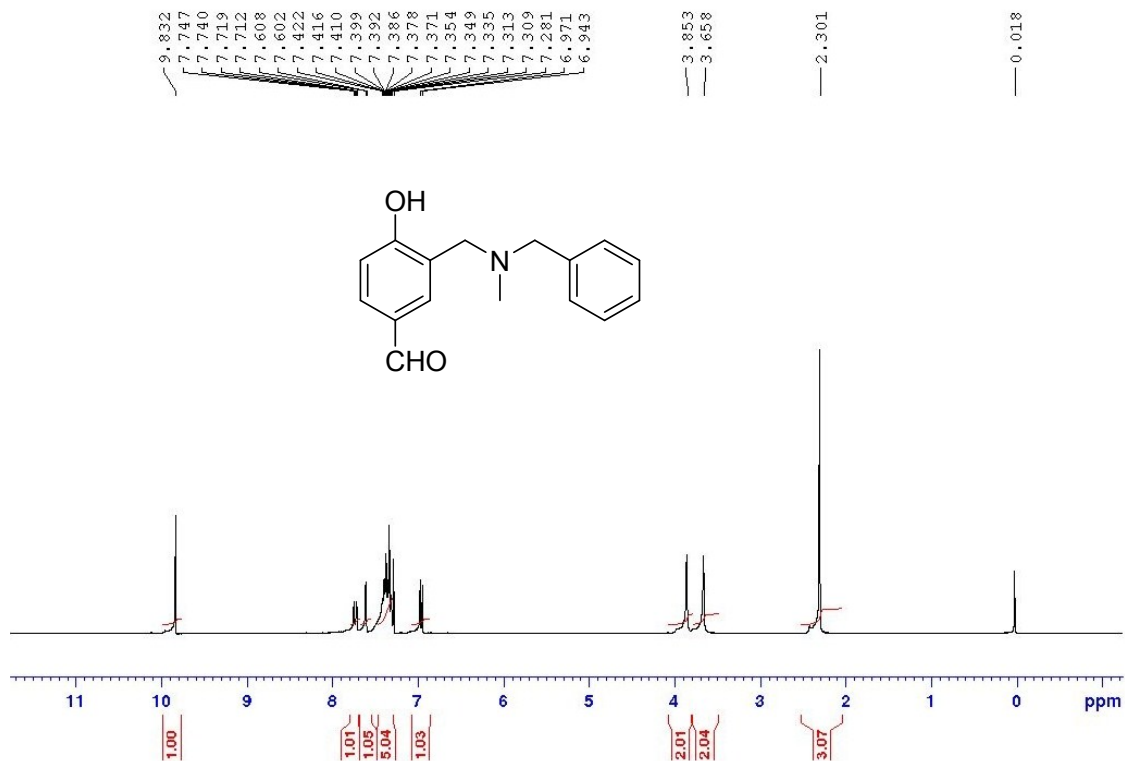

Spectrum19: <sup>1</sup>H NMR of 3j

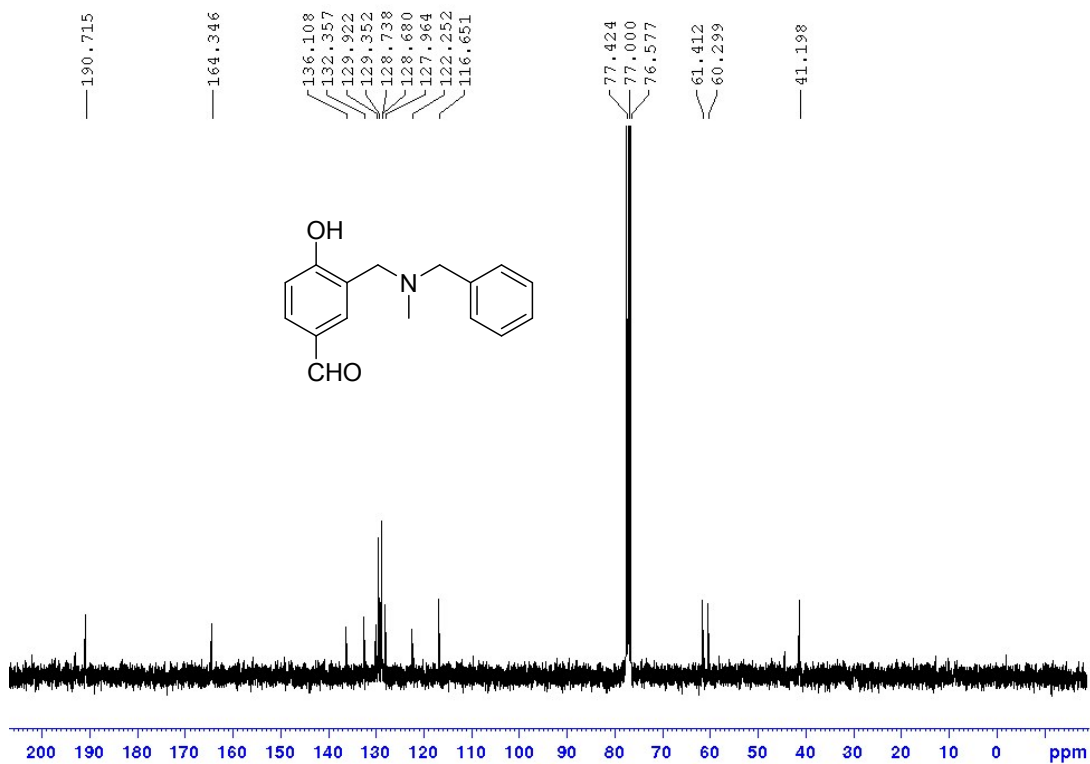

Spectrum20: <sup>13</sup>C{<sup>1</sup>H} NMR of 3j

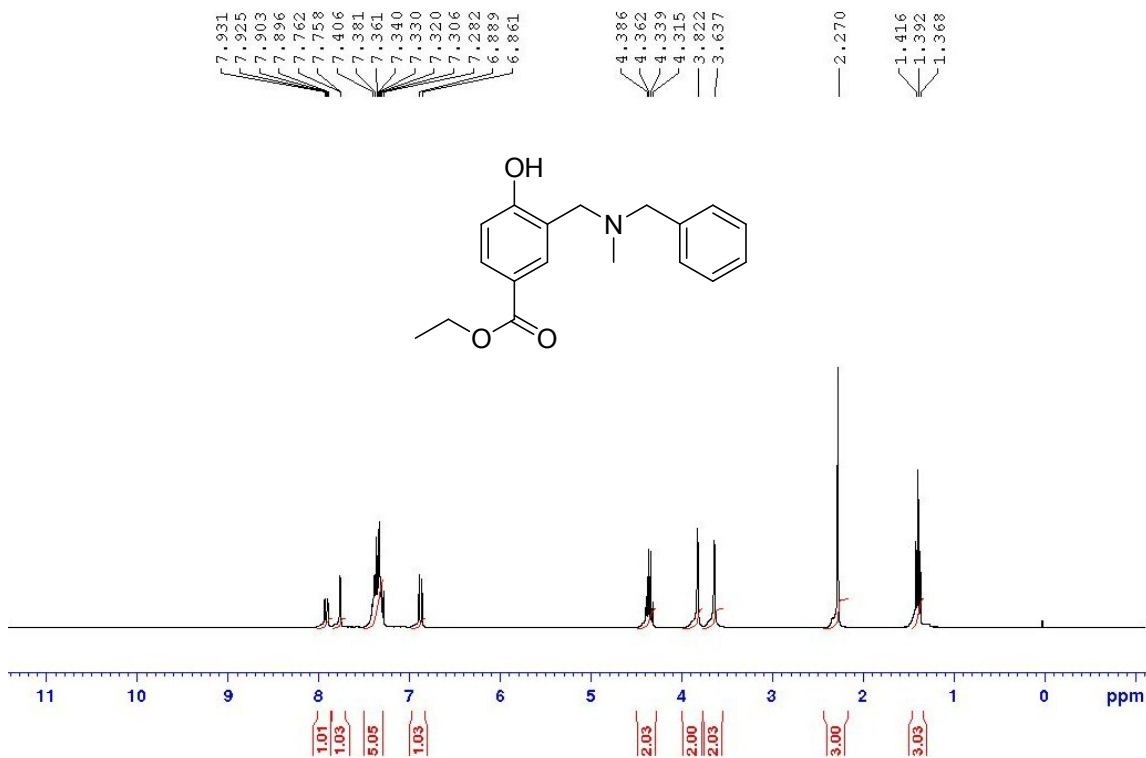

Spectrum21: <sup>1</sup>H NMR of 3k

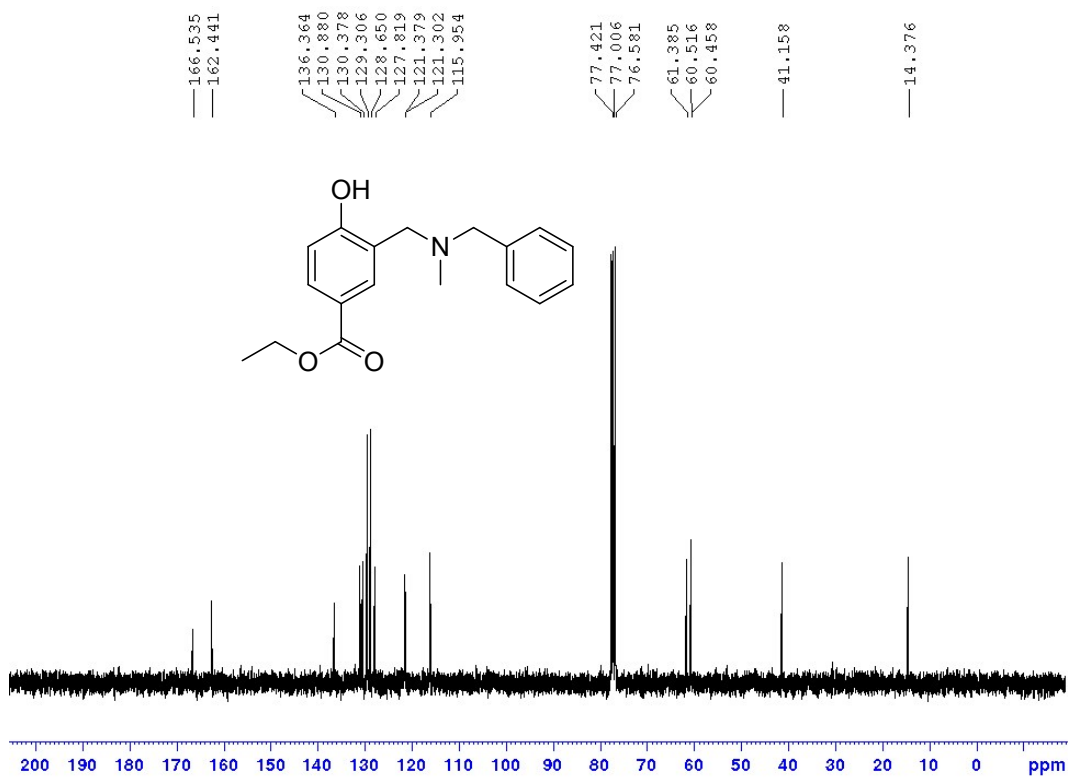

Spectrum22: <sup>13</sup>C{<sup>1</sup>H} NMR of 3k



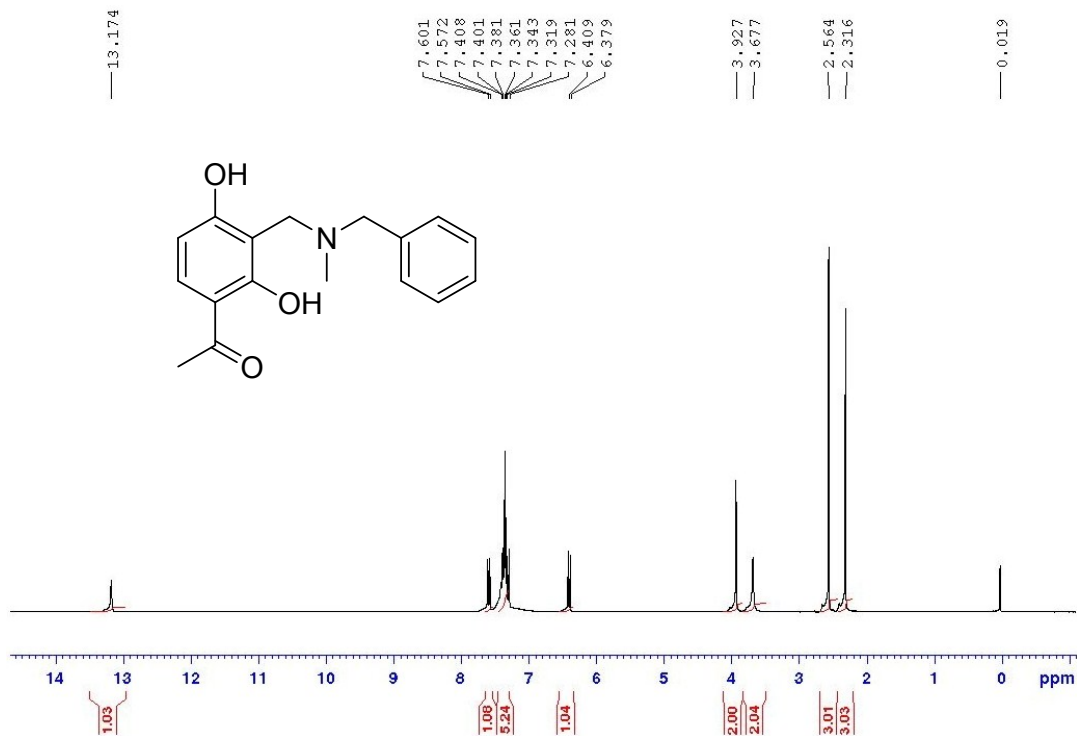

Spectrum23: <sup>1</sup>H NMR of 3I

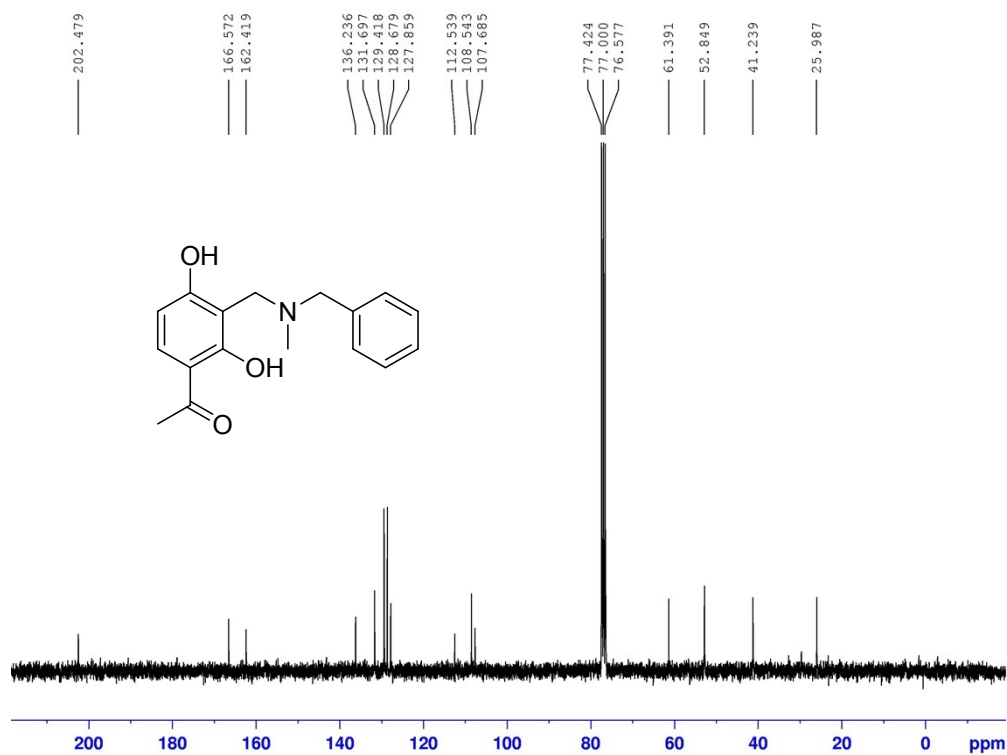

Spectrum24: <sup>13</sup>C{<sup>1</sup>H} NMR of 3I

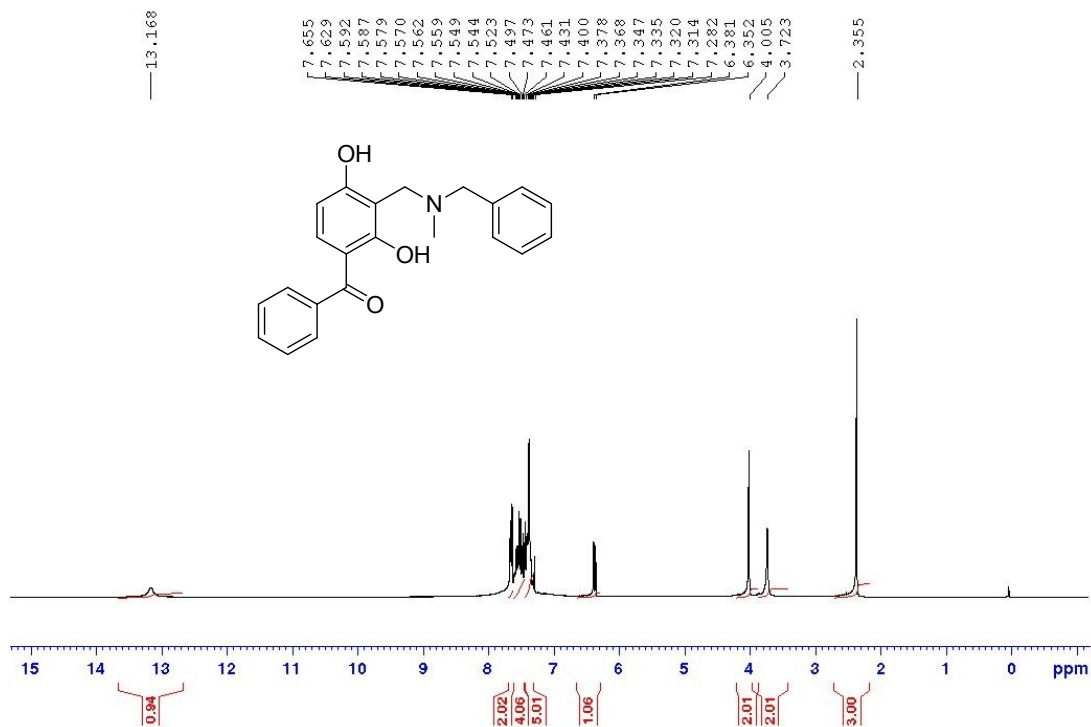

Spectrum25: <sup>1</sup>H NMR of 3m

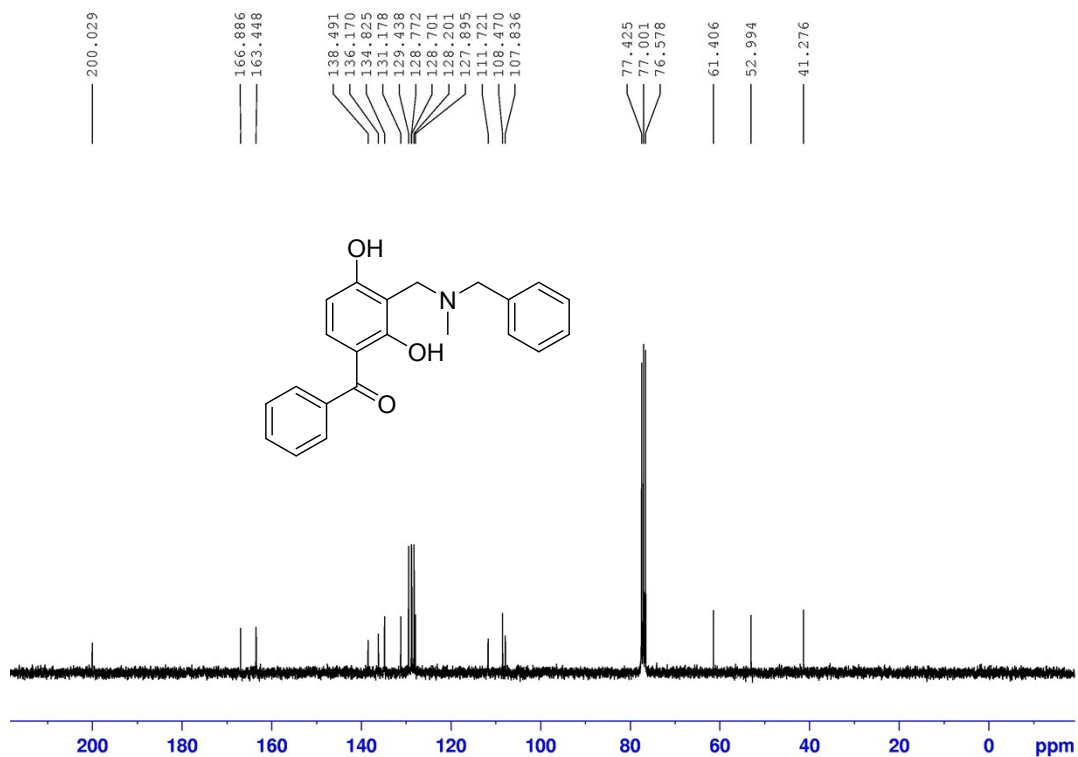

Spectrum26: <sup>13</sup>C{<sup>1</sup>H} NMR of 3m

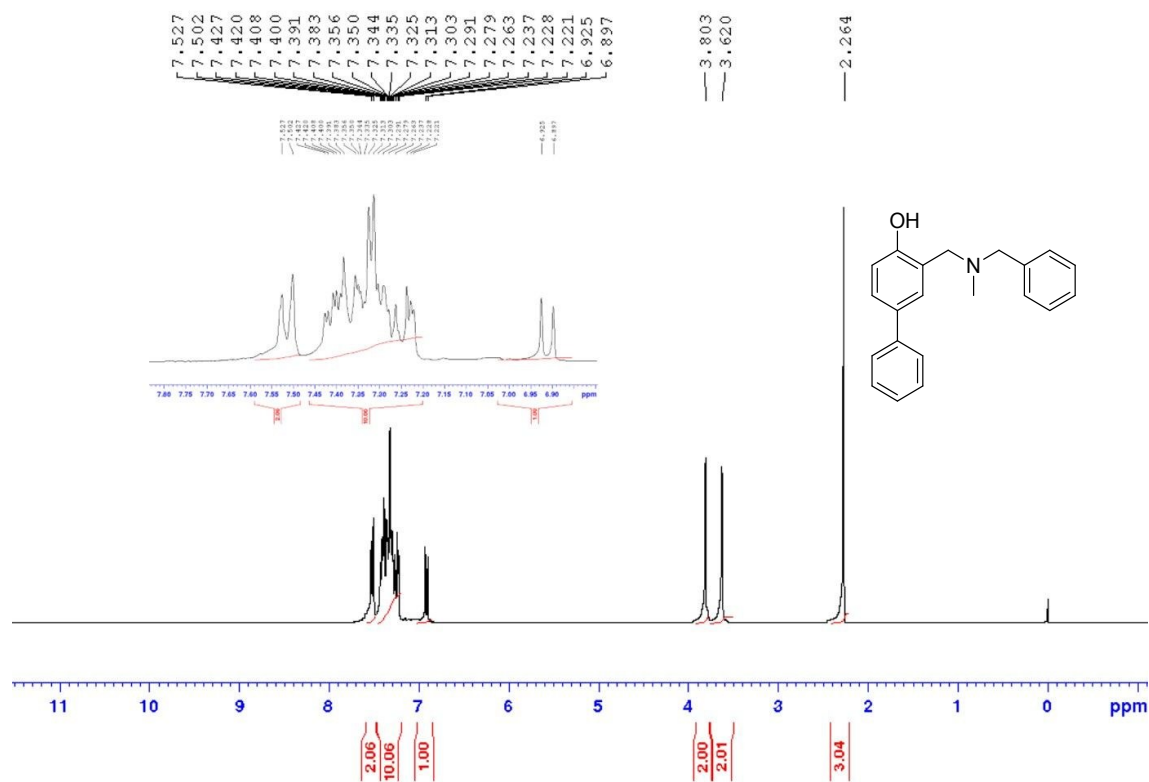

Spectrum27: <sup>1</sup>H NMR of 3n

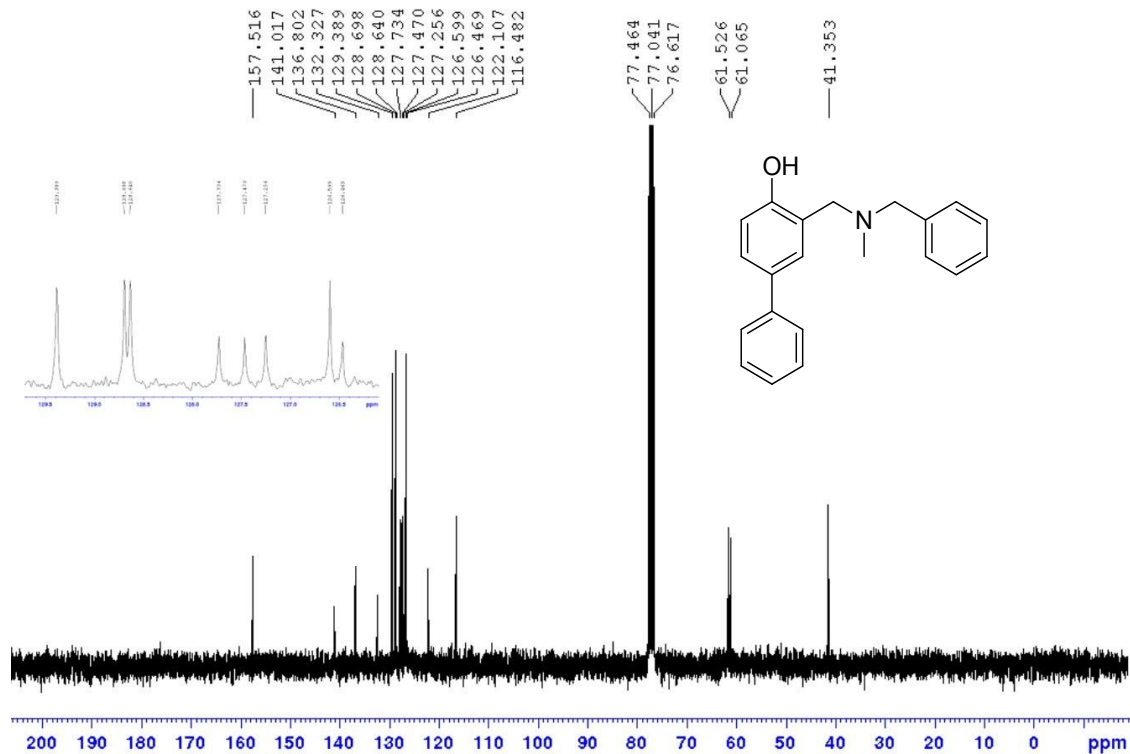

Spectrum28: <sup>13</sup>C{<sup>1</sup>H} NMR of 3n

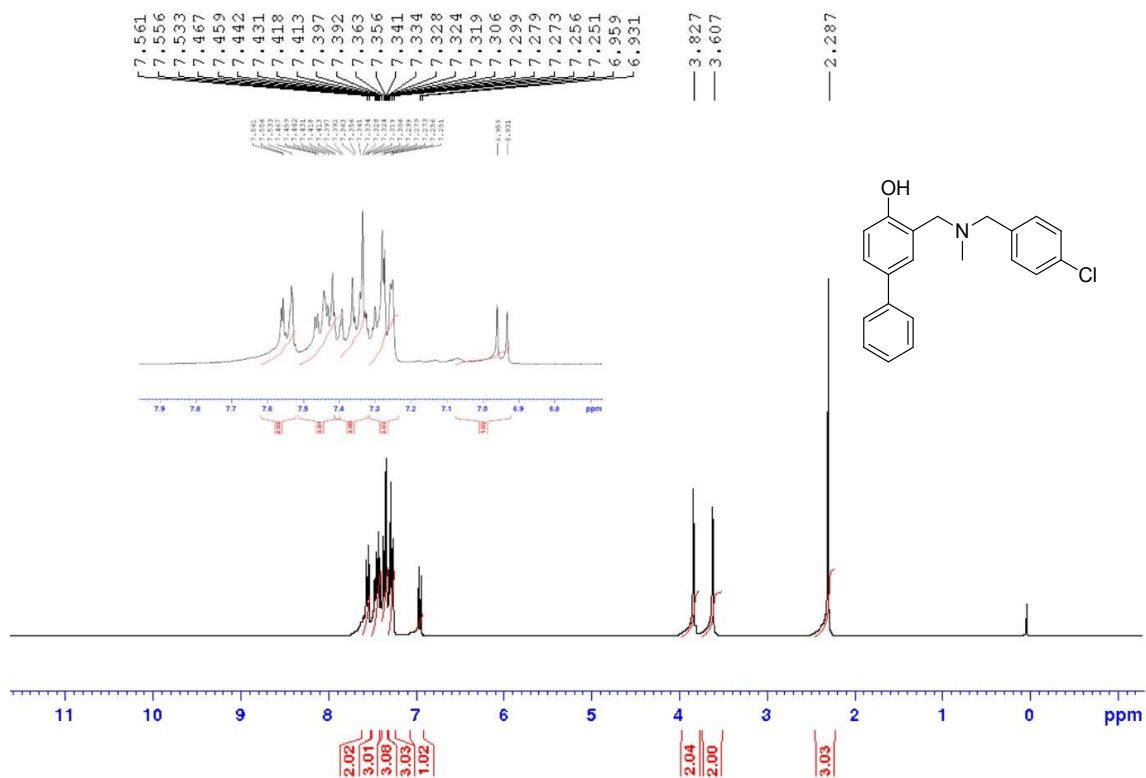

Spectrum29: <sup>1</sup>H NMR of 3o

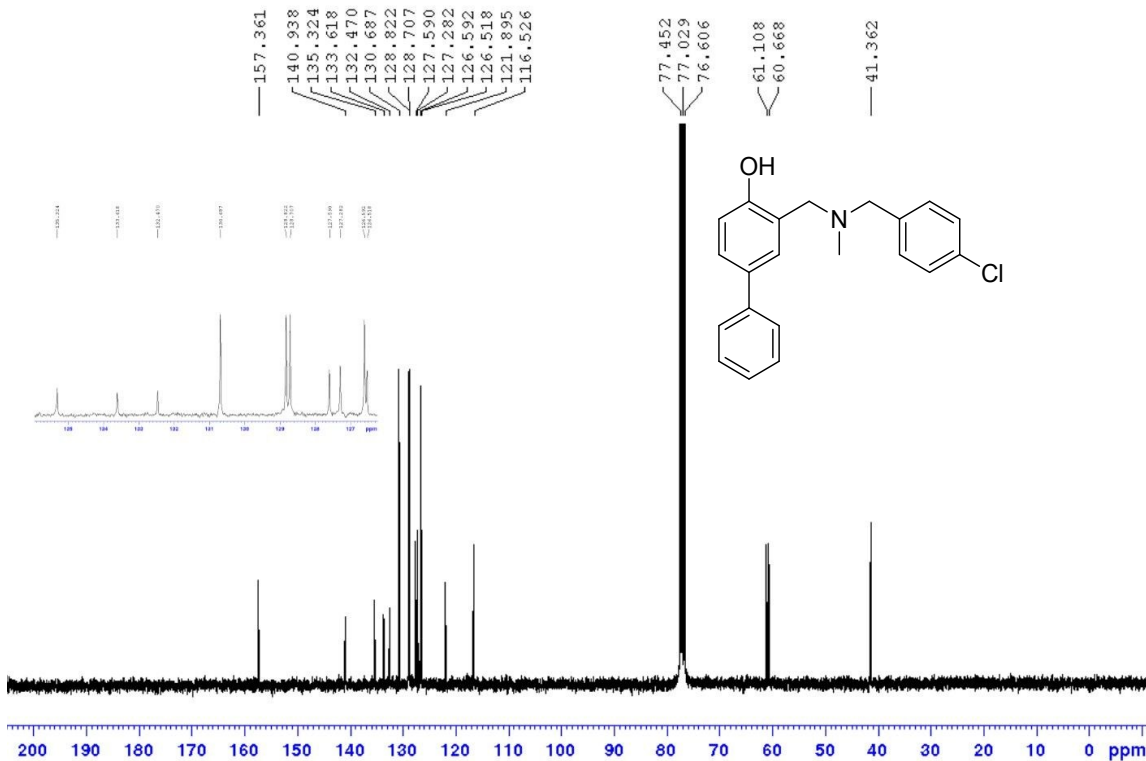

Spectrum30: <sup>13</sup>C{<sup>1</sup>H} NMR of 3o

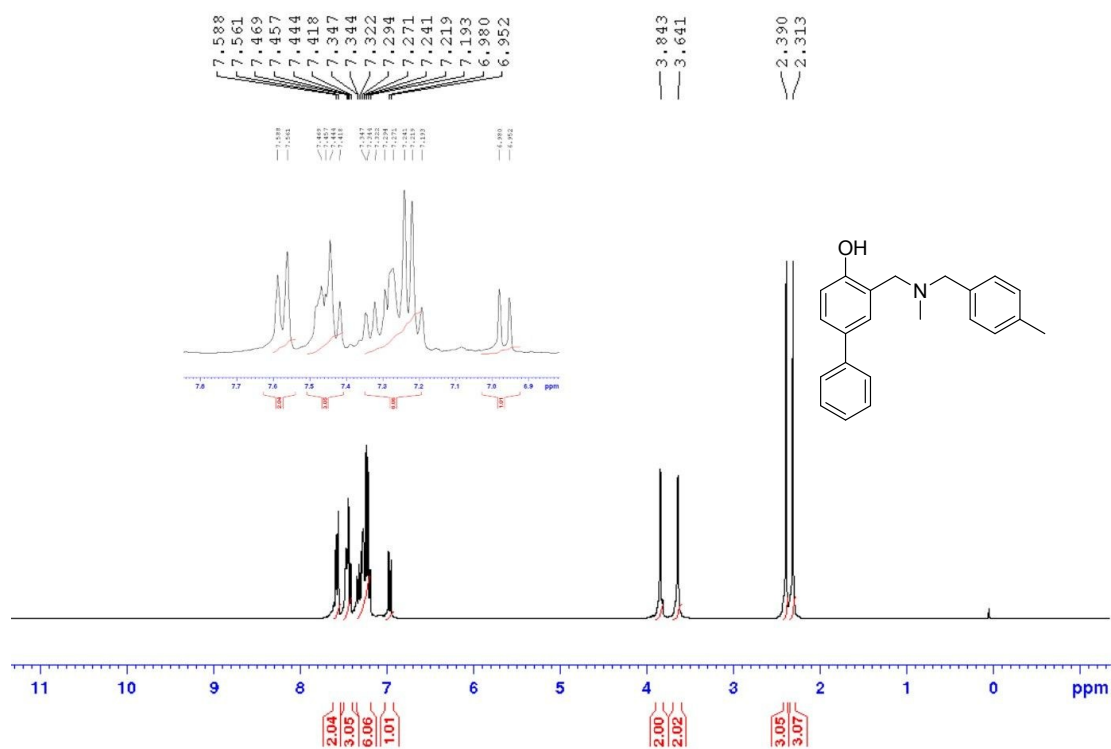

Spectrum31: <sup>1</sup>H NMR of 3p

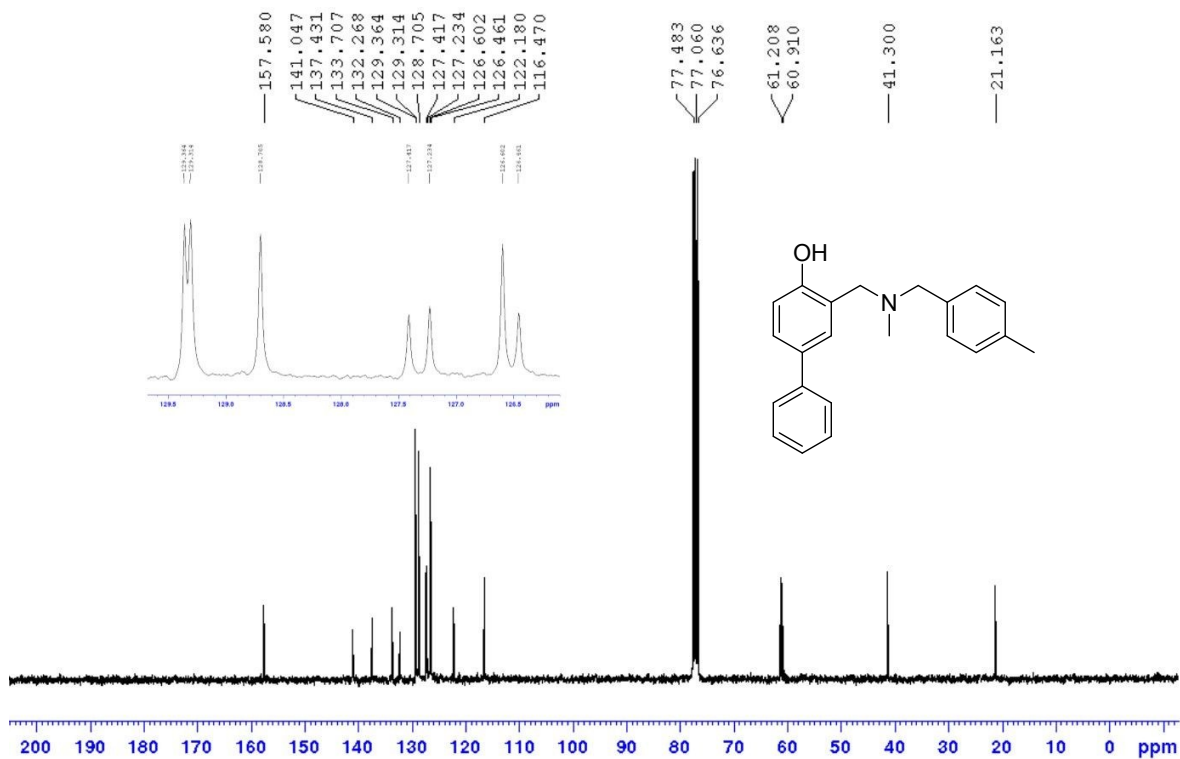

Spectrum32: <sup>13</sup>C{<sup>1</sup>H} NMR of 3p

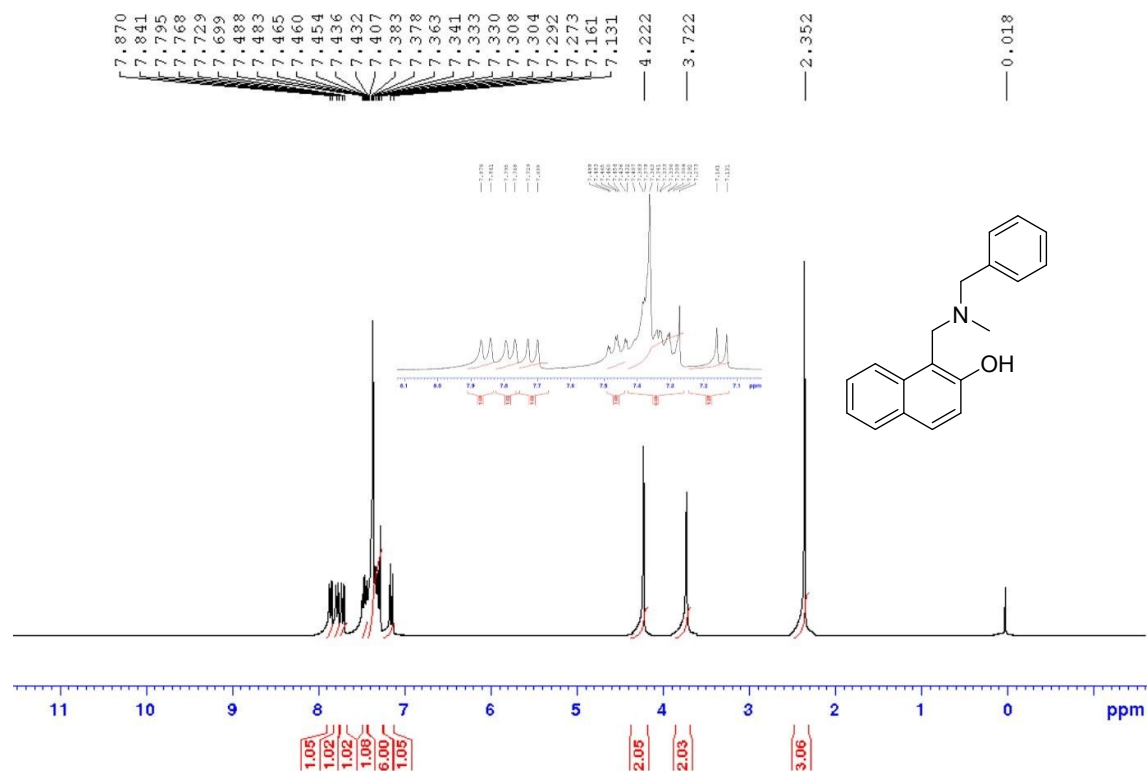

Spectrum33: <sup>1</sup>H NMR of 5a

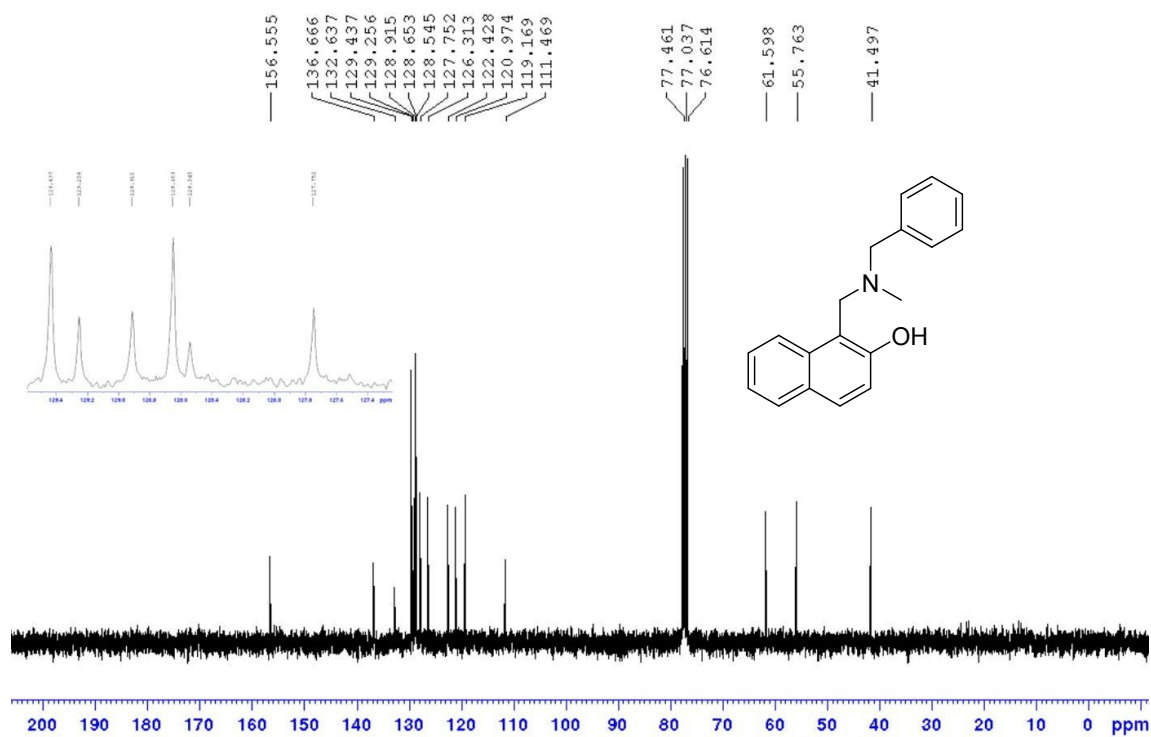

Spectrum34: <sup>13</sup>C{<sup>1</sup>H} NMR of 5a

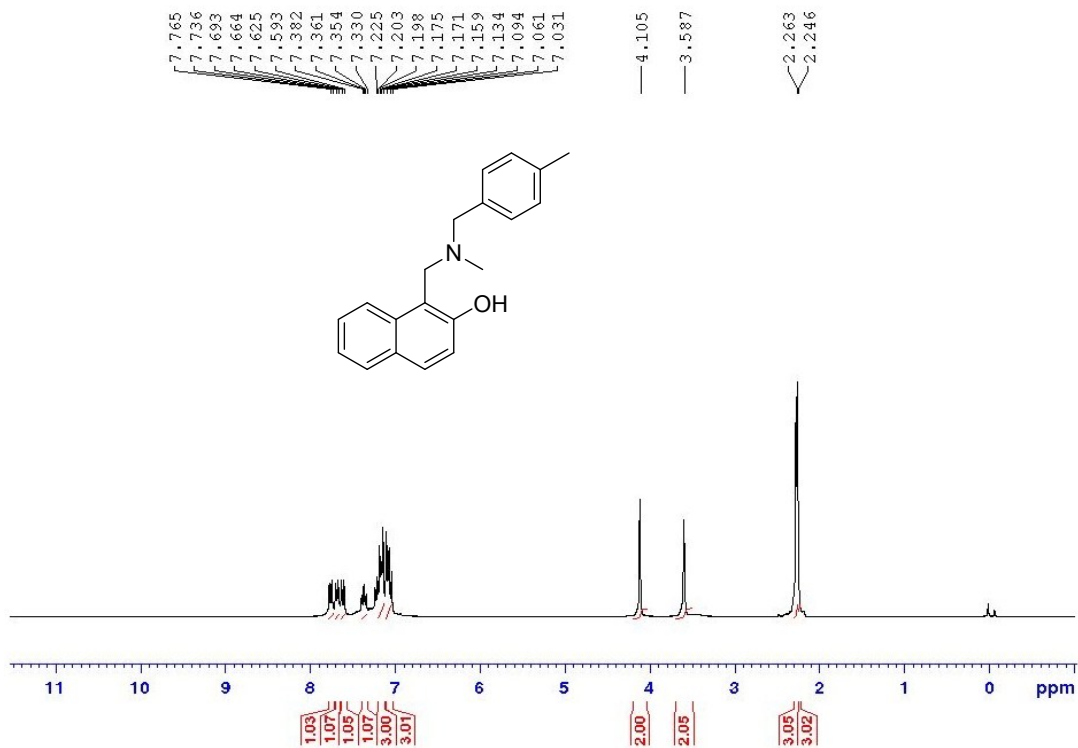

Spectrum35: <sup>1</sup>H NMR of 5b

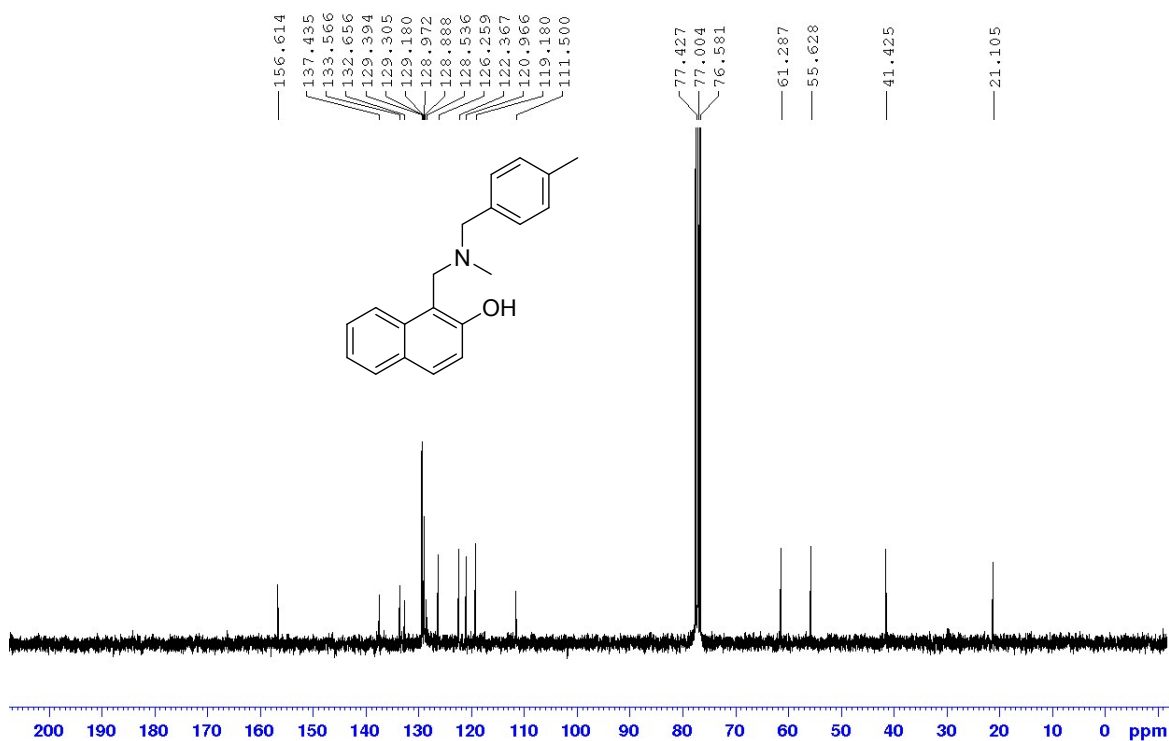

Spectrum36: <sup>13</sup>C{<sup>1</sup>H} NMR of 5b

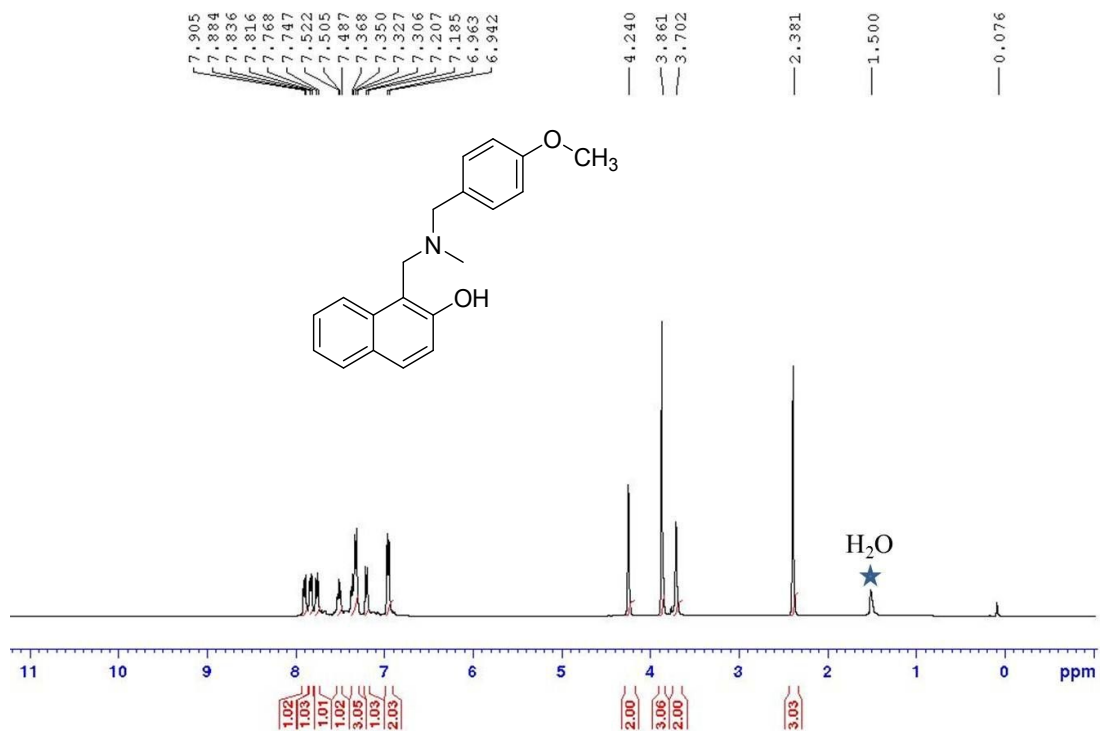

Spectrum37: <sup>1</sup>H NMR of 5c

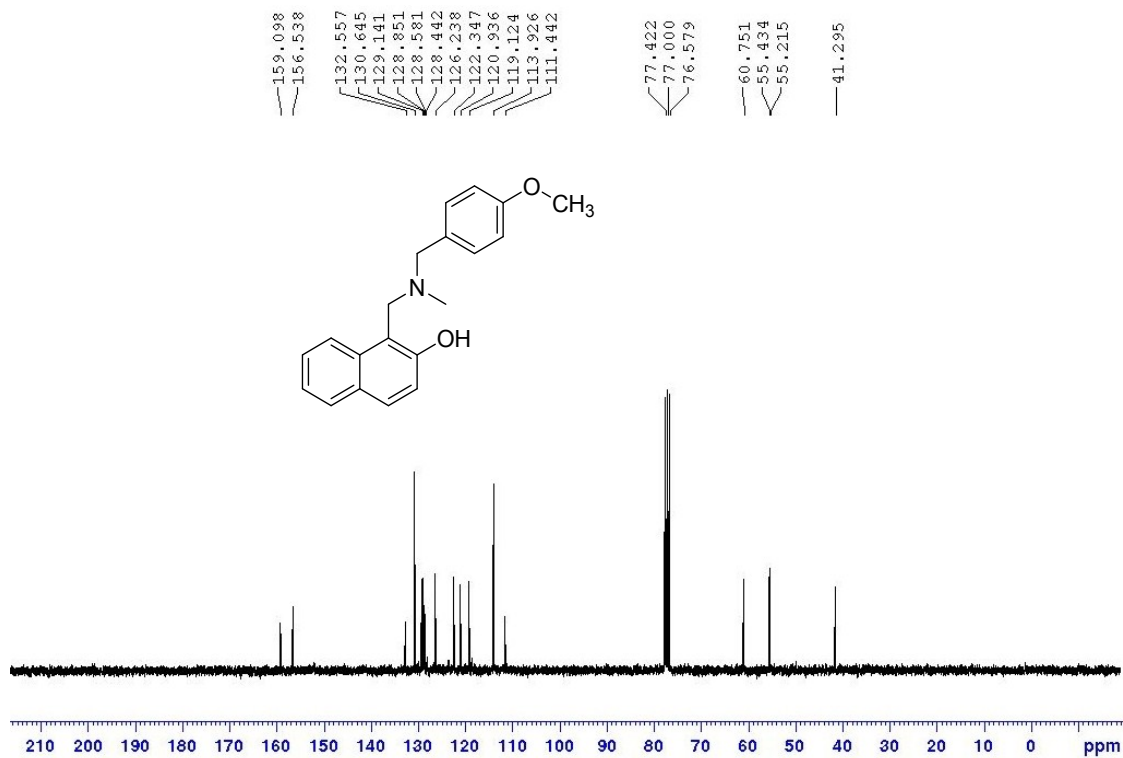

Spectrum38: <sup>13</sup>C{<sup>1</sup>H} NMR of 5c



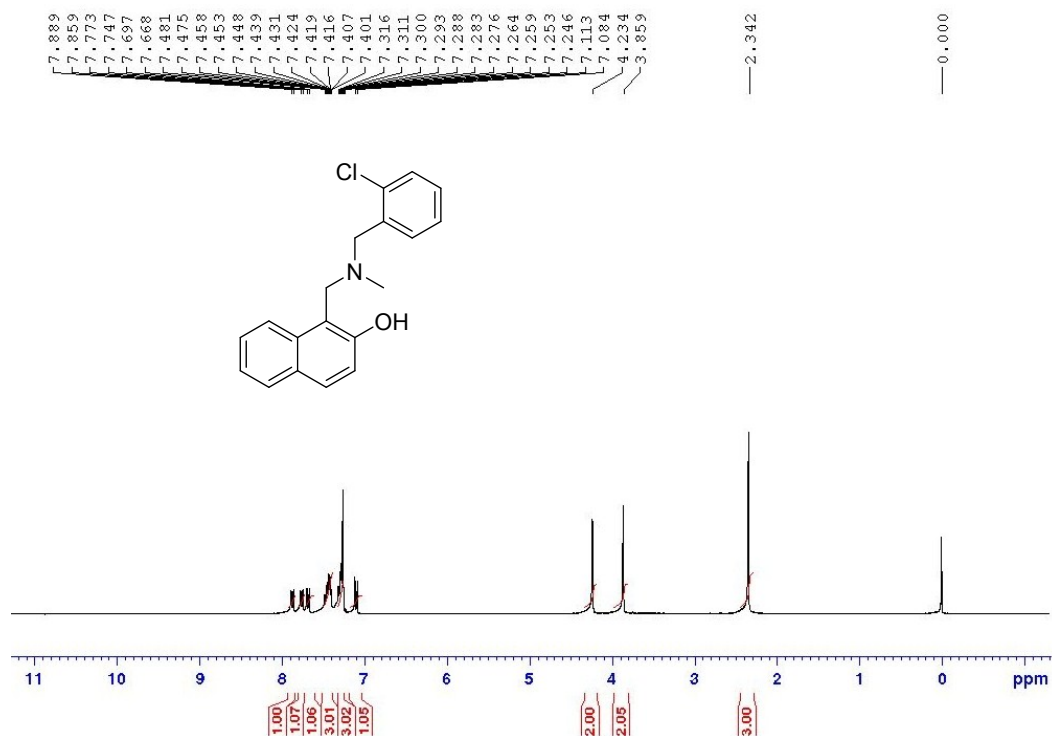

Spectrum39: <sup>1</sup>H NMR of 5d

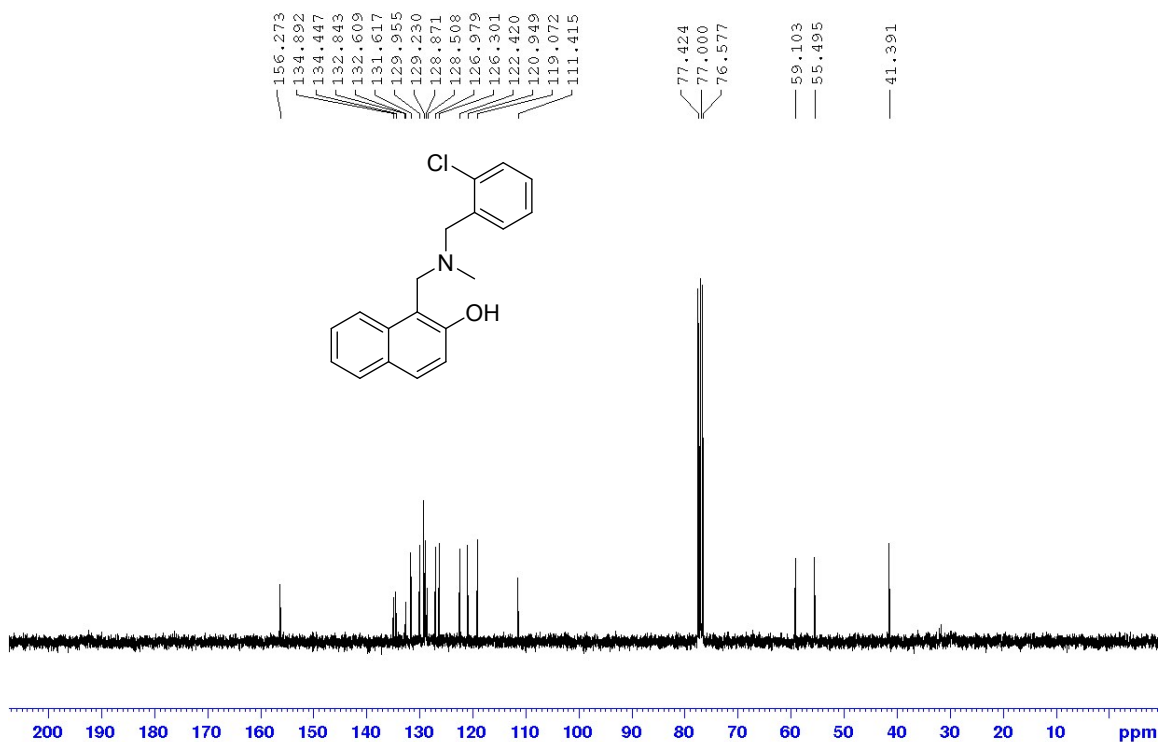

Spectrum40: <sup>13</sup>C{<sup>1</sup>H} NMR of 5d

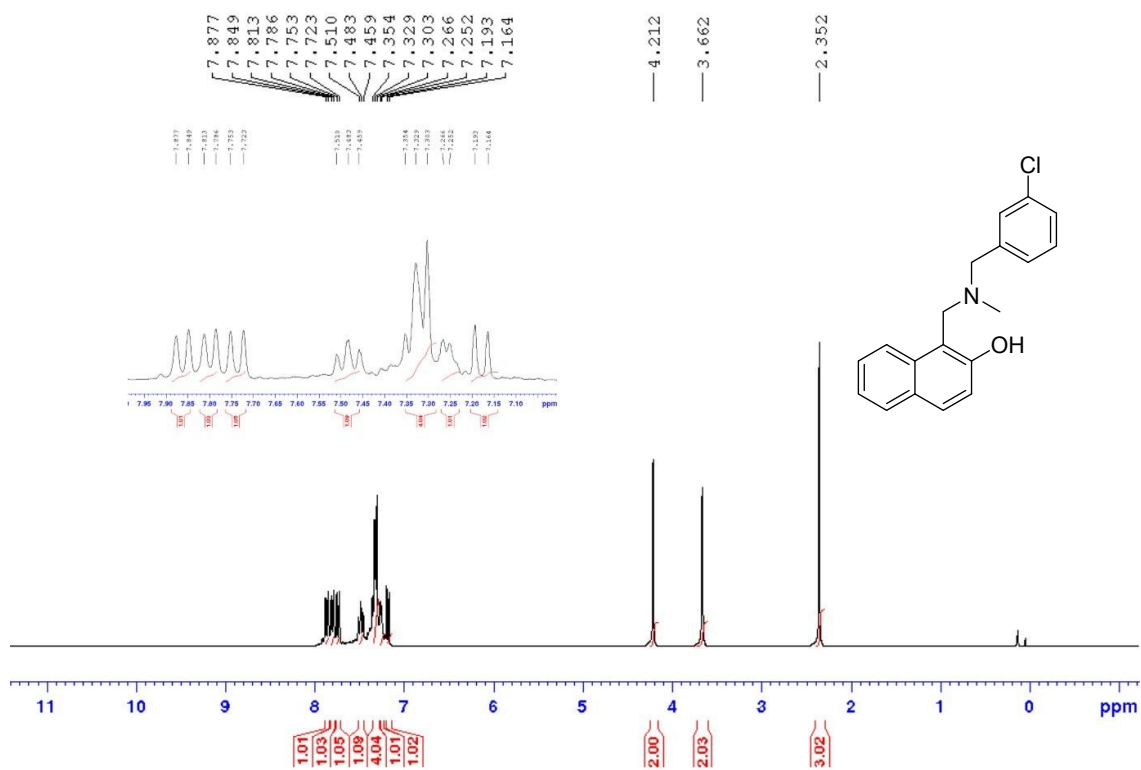

**Spectrum41: <sup>1</sup>H NMR of 5e**

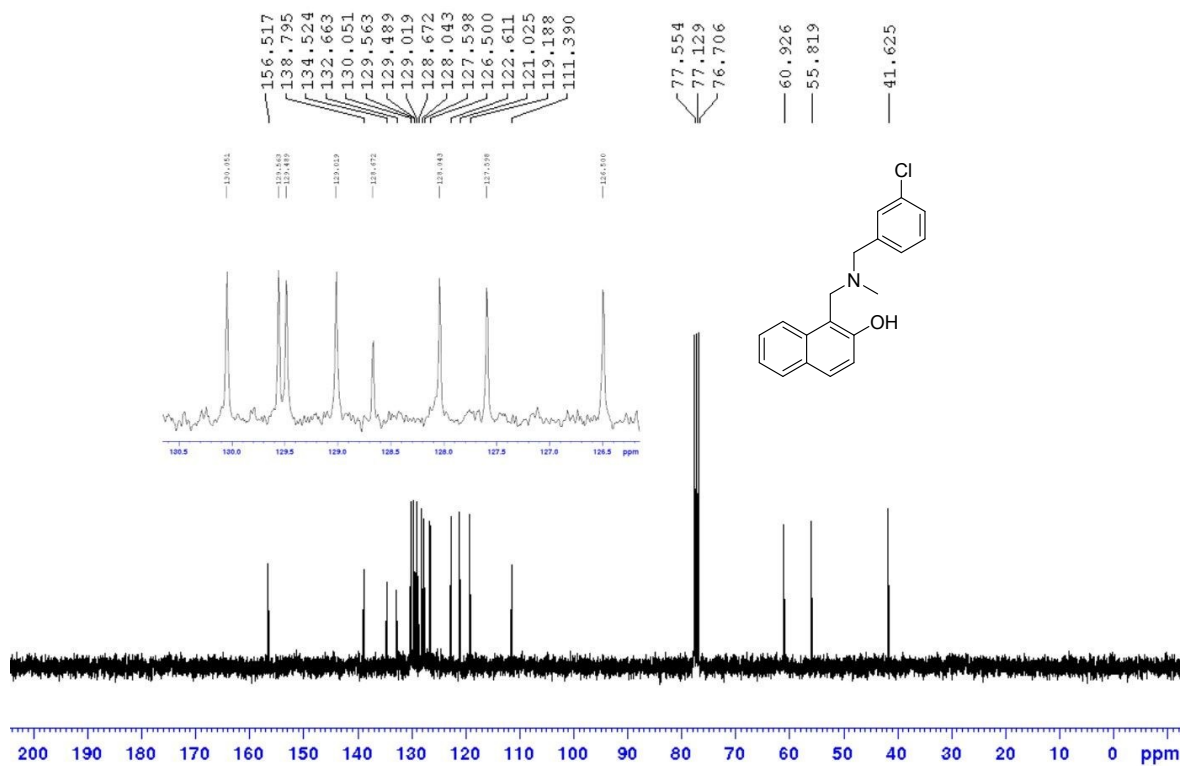

**Spectrum42: <sup>13</sup>C{<sup>1</sup>H} NMR of 5e**

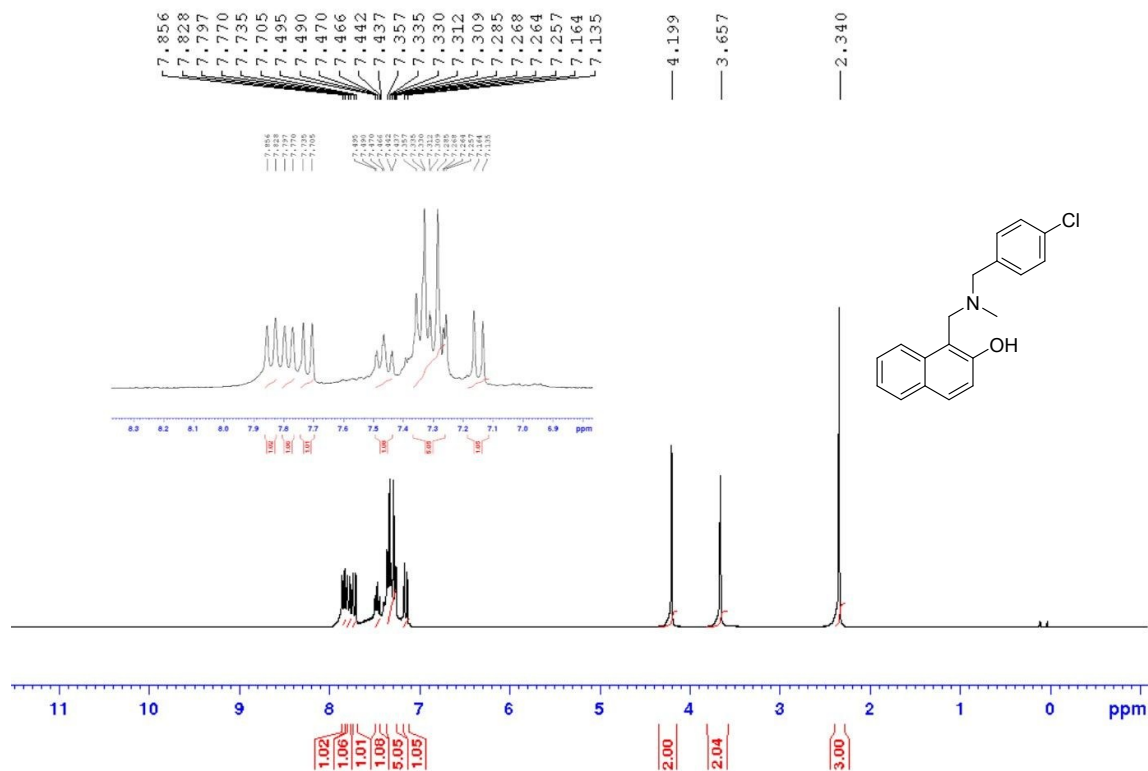

**Spectrum43: <sup>1</sup>H NMR of 5f**

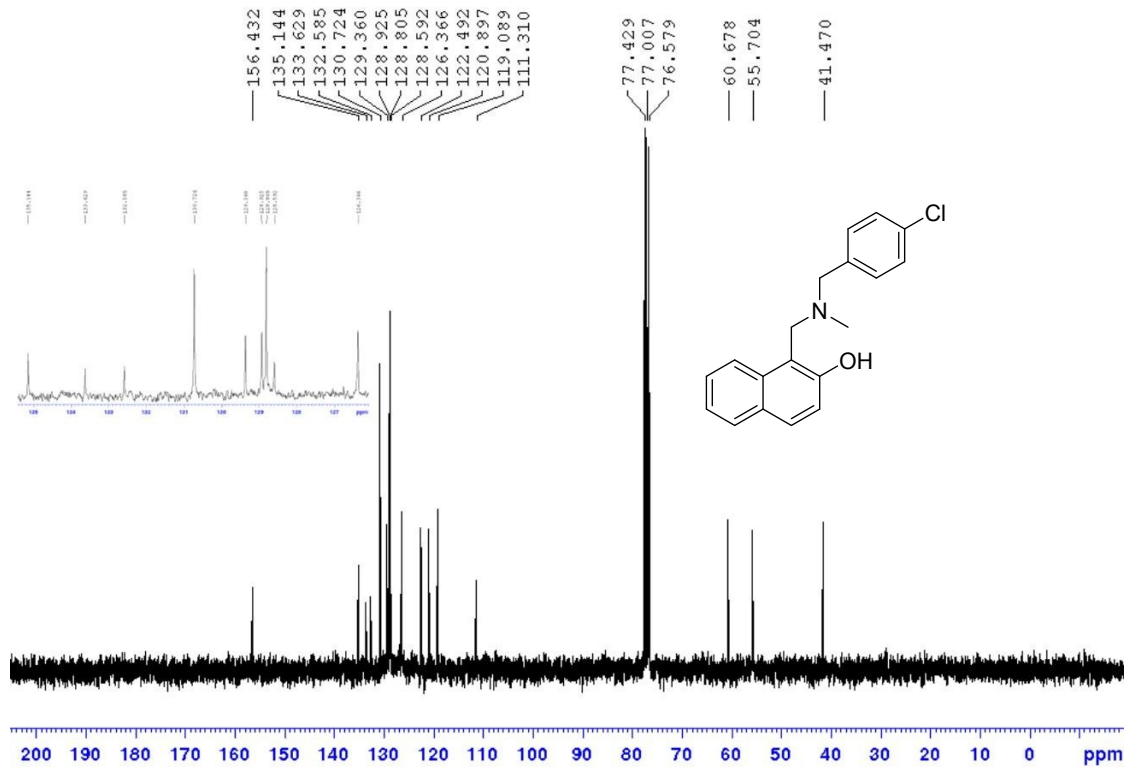

**Spectrum44: <sup>13</sup>C{<sup>1</sup>H} NMR of 5f**

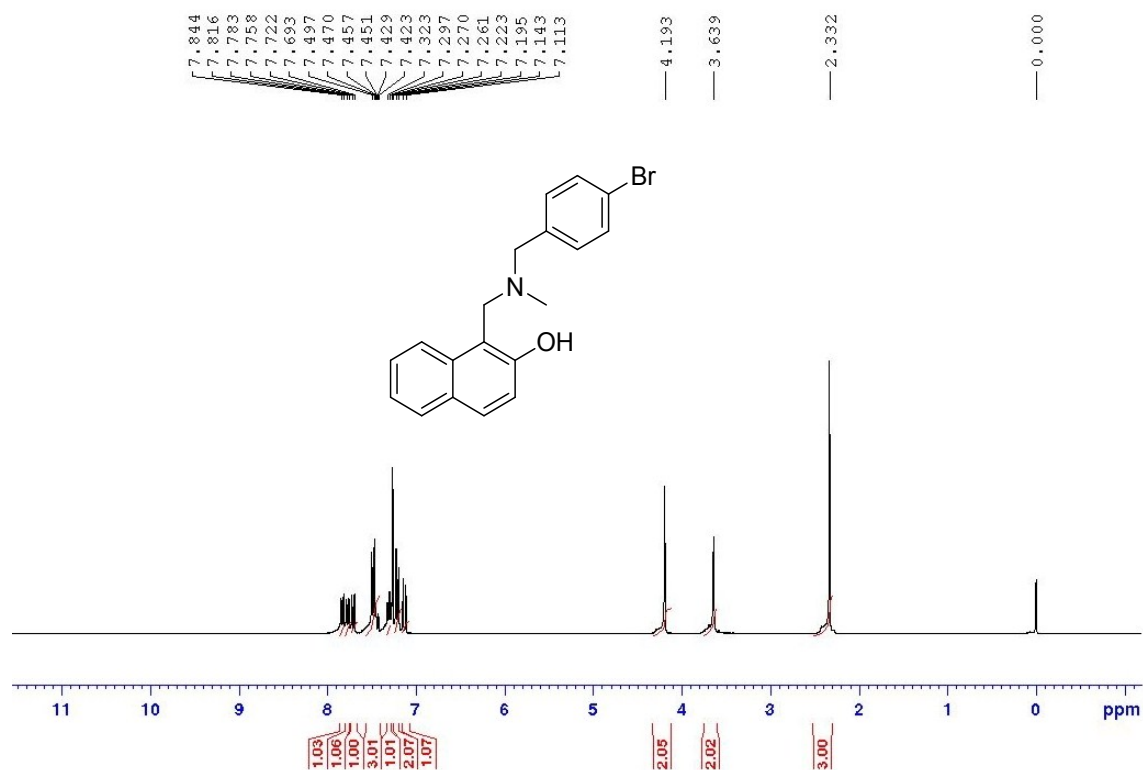

Spectrum45:  $^1\text{H}$  NMR of 5g

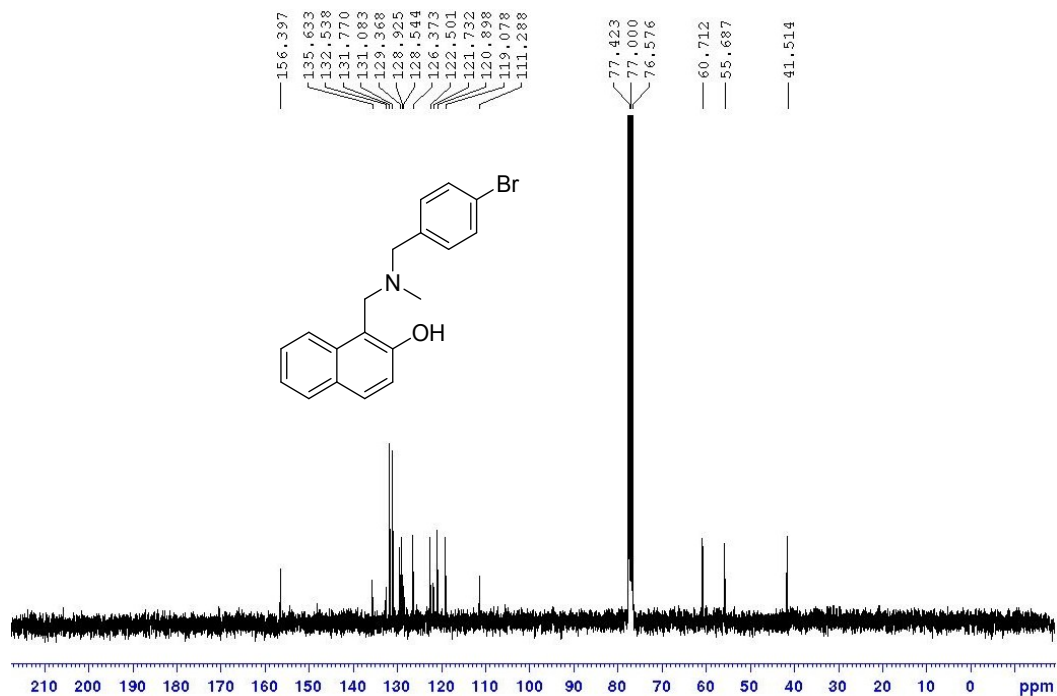

Spectrum46:  $^{13}\text{C}\{^1\text{H}\}$  NMR of 5g

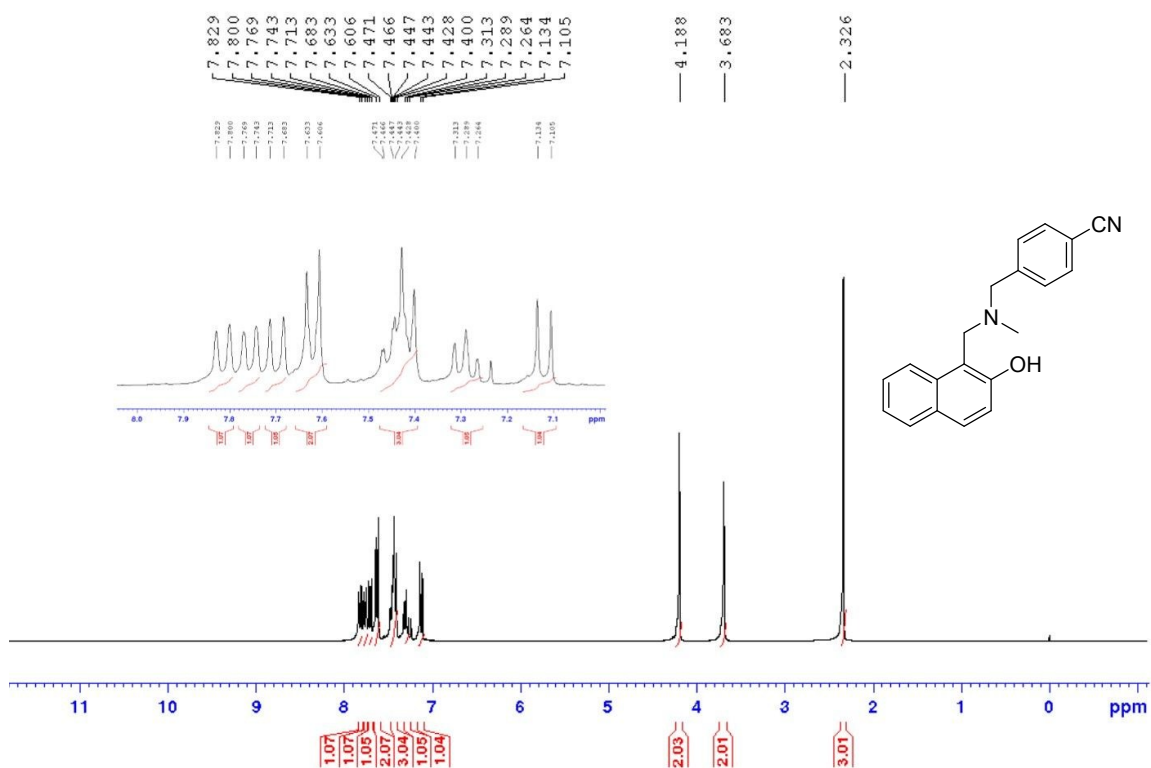

**Spectrum47: <sup>1</sup>H NMR of 5h**

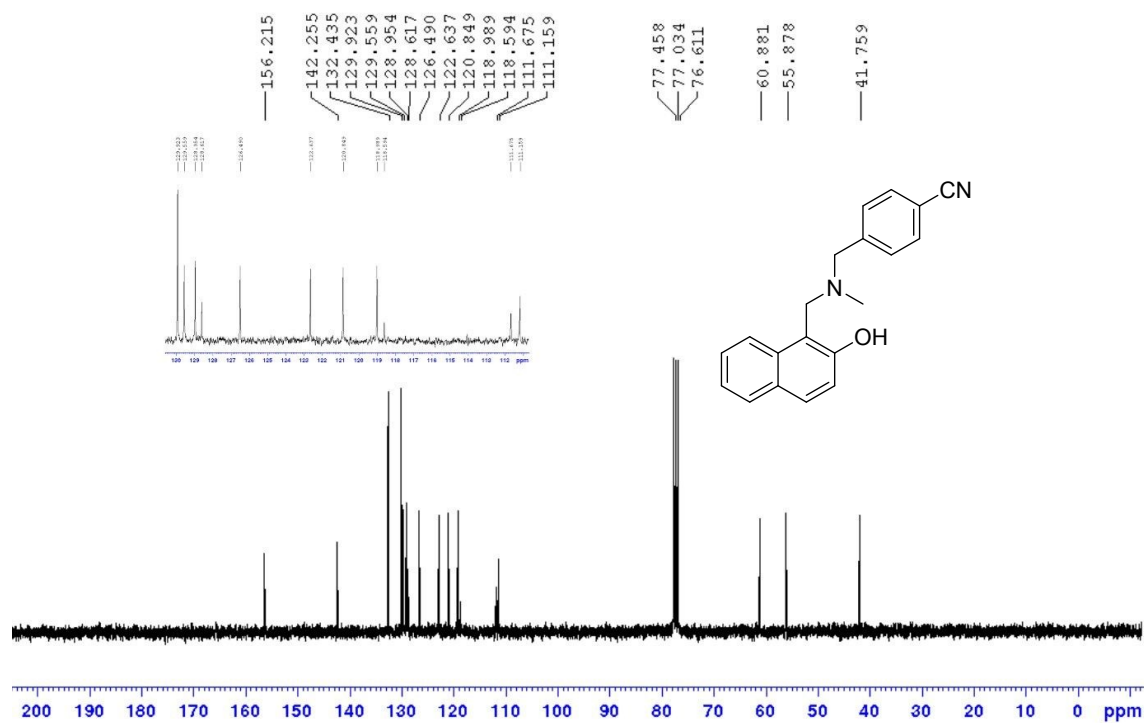

**Spectrum48: <sup>13</sup>C{<sup>1</sup>H} NMR of 5h**

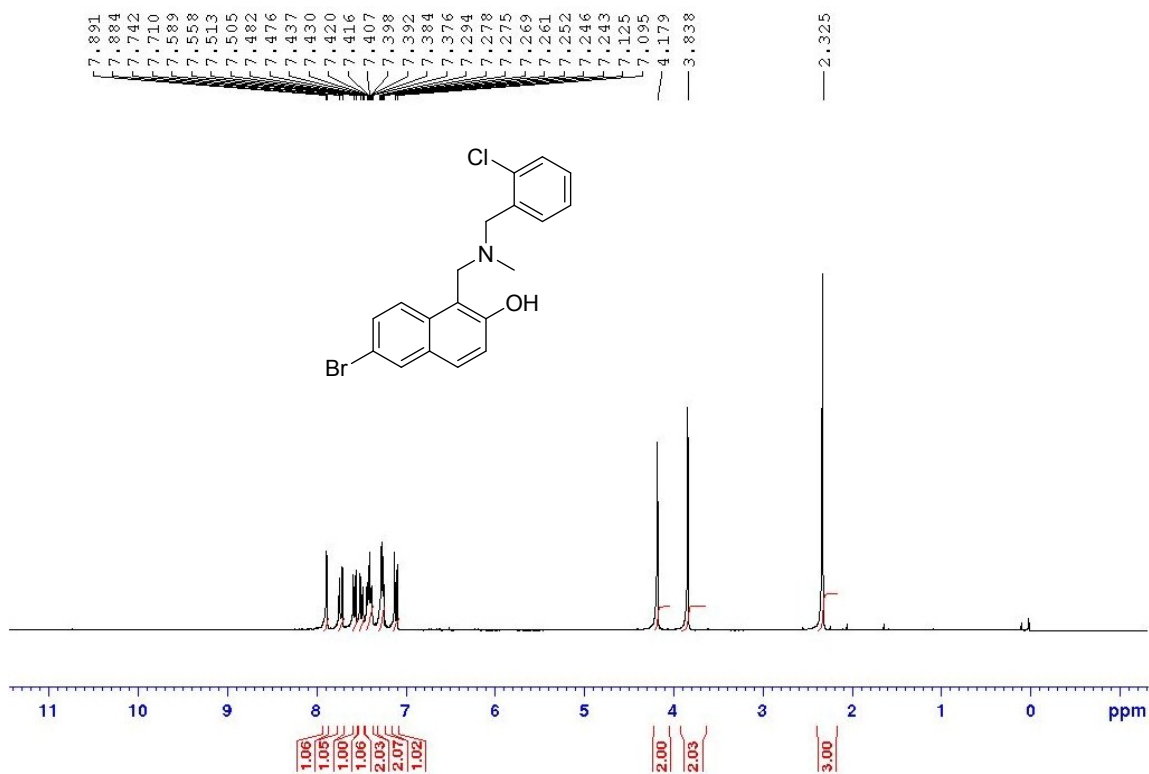

Spectrum49: <sup>1</sup>H NMR of 5i

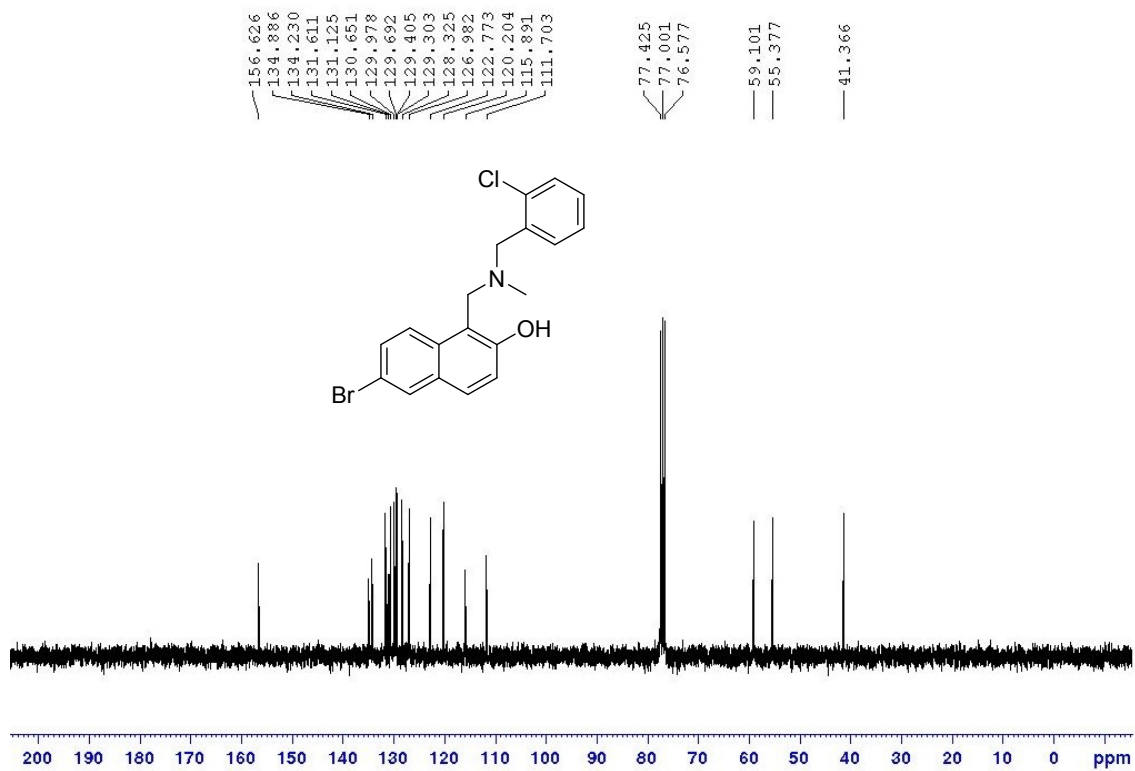

Spectrum50: <sup>13</sup>C{<sup>1</sup>H} NMR of 5i

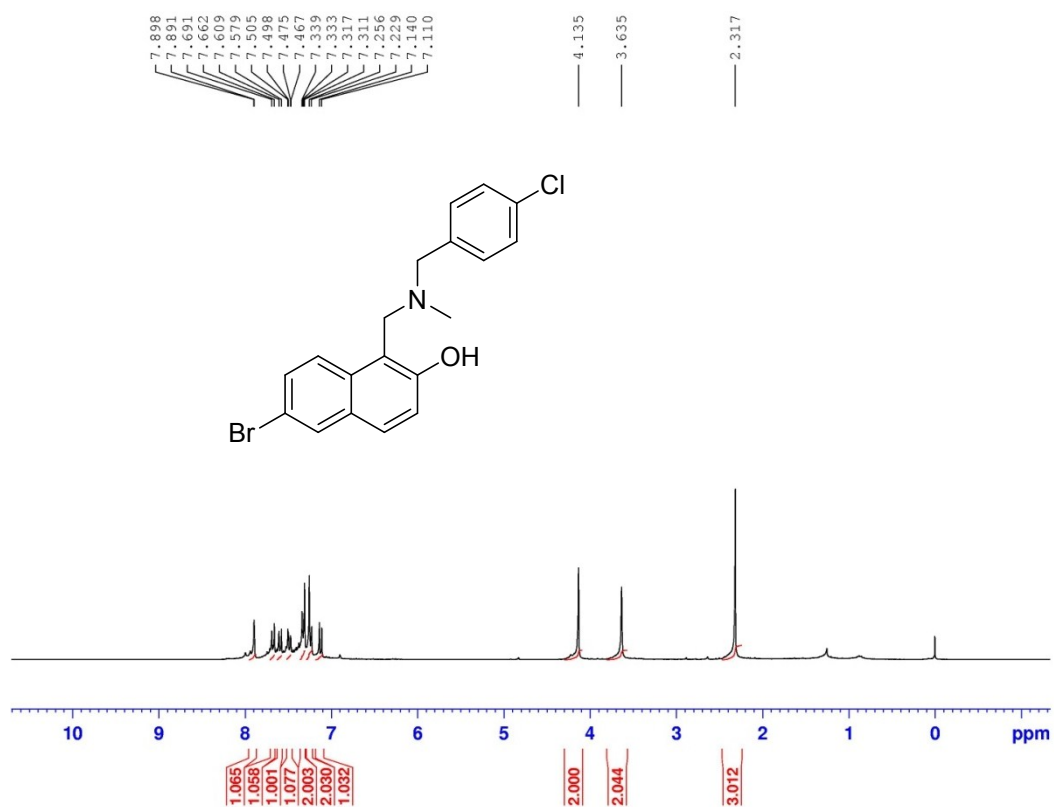

Spectrum51: <sup>1</sup>H NMR of 5j

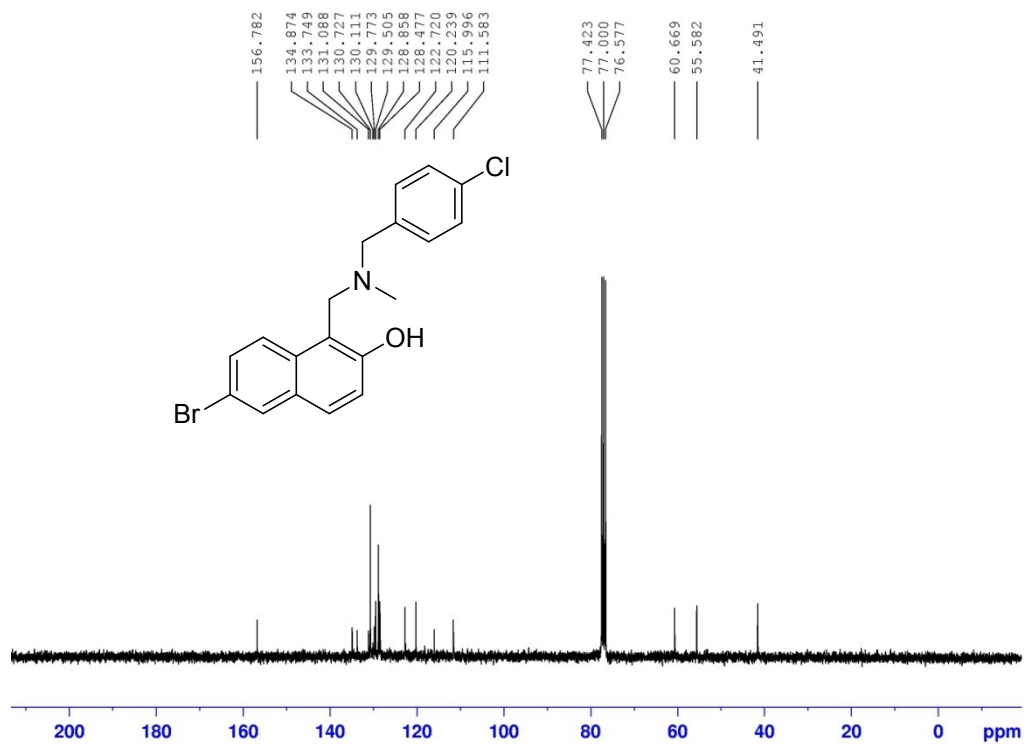

Spectrum52: <sup>13</sup>C{<sup>1</sup>H} NMR of 5j

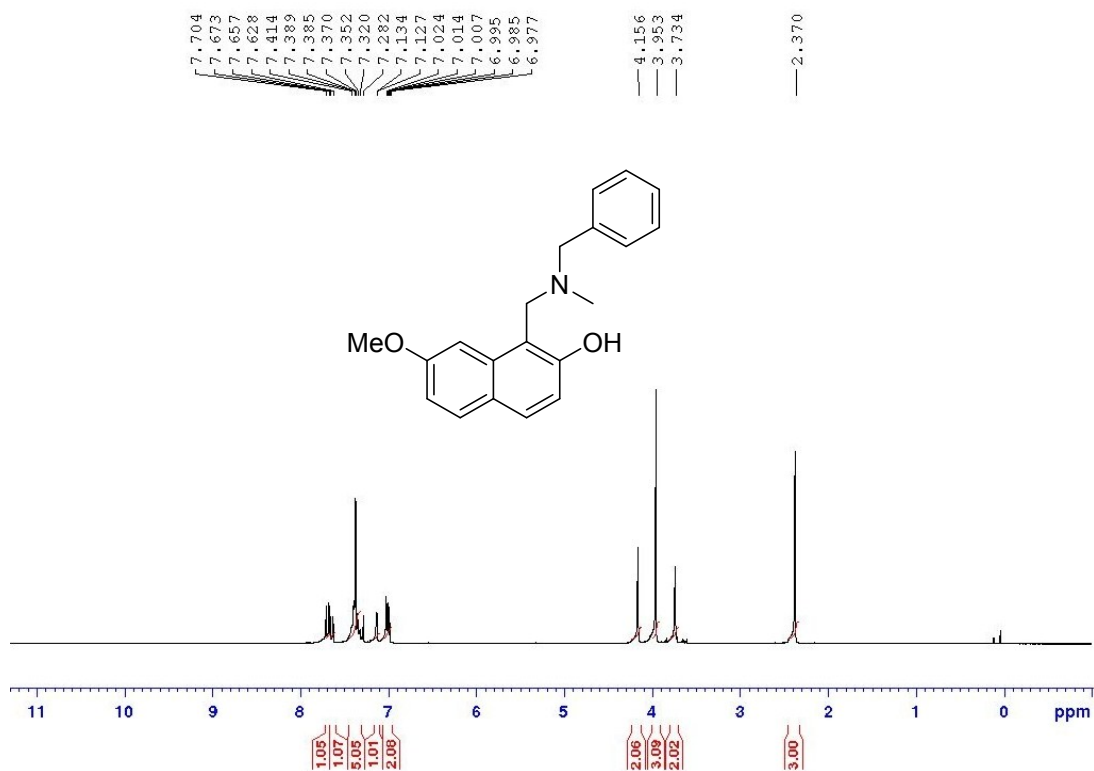

Spectrum53: <sup>1</sup>H NMR of 5k

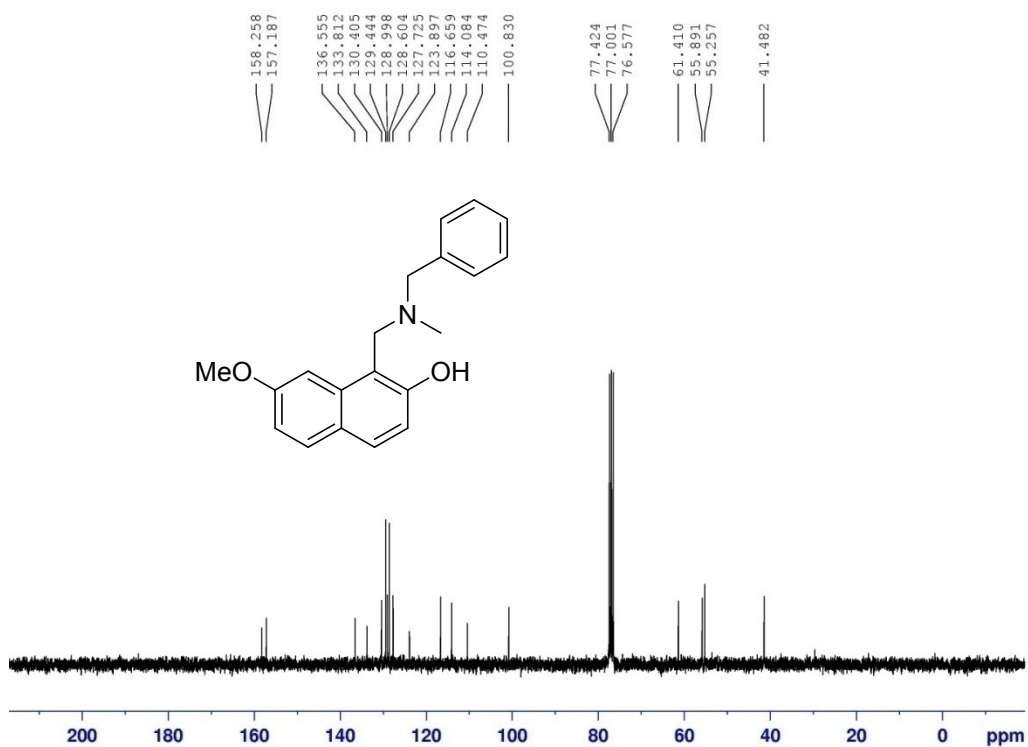

Spectrum54: <sup>13</sup>C{<sup>1</sup>H} NMR of 5k



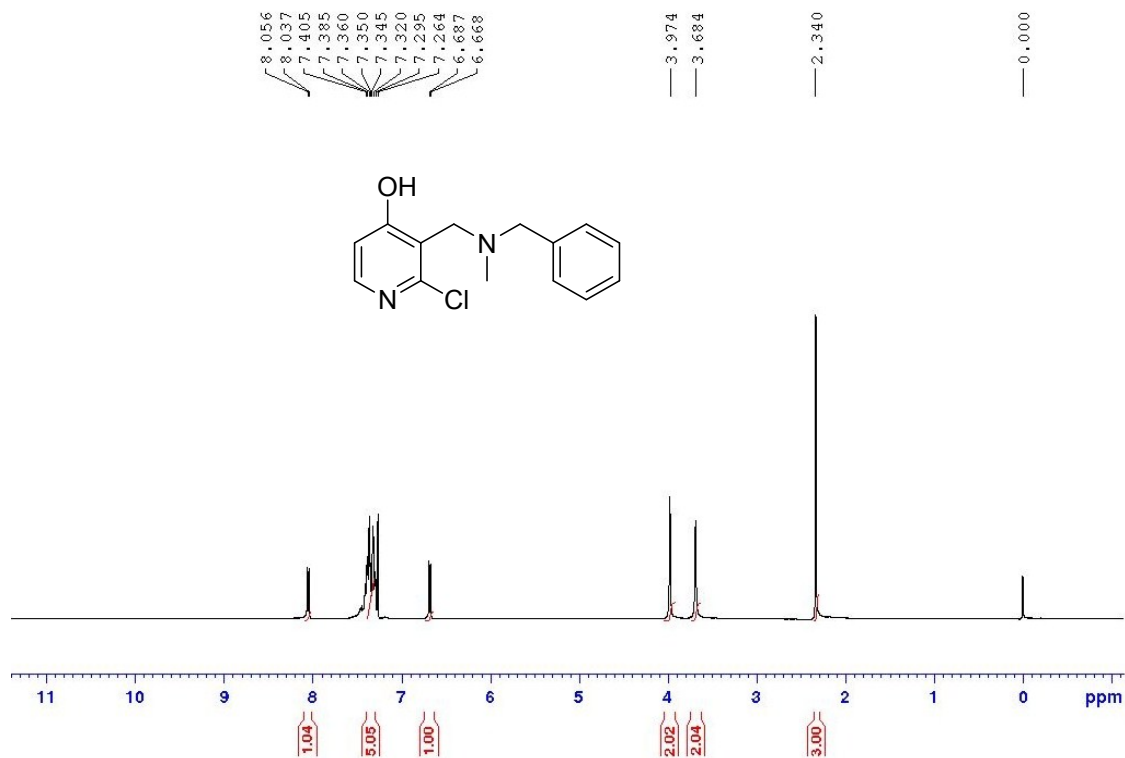

Spectrum55: <sup>1</sup>H NMR of 7a

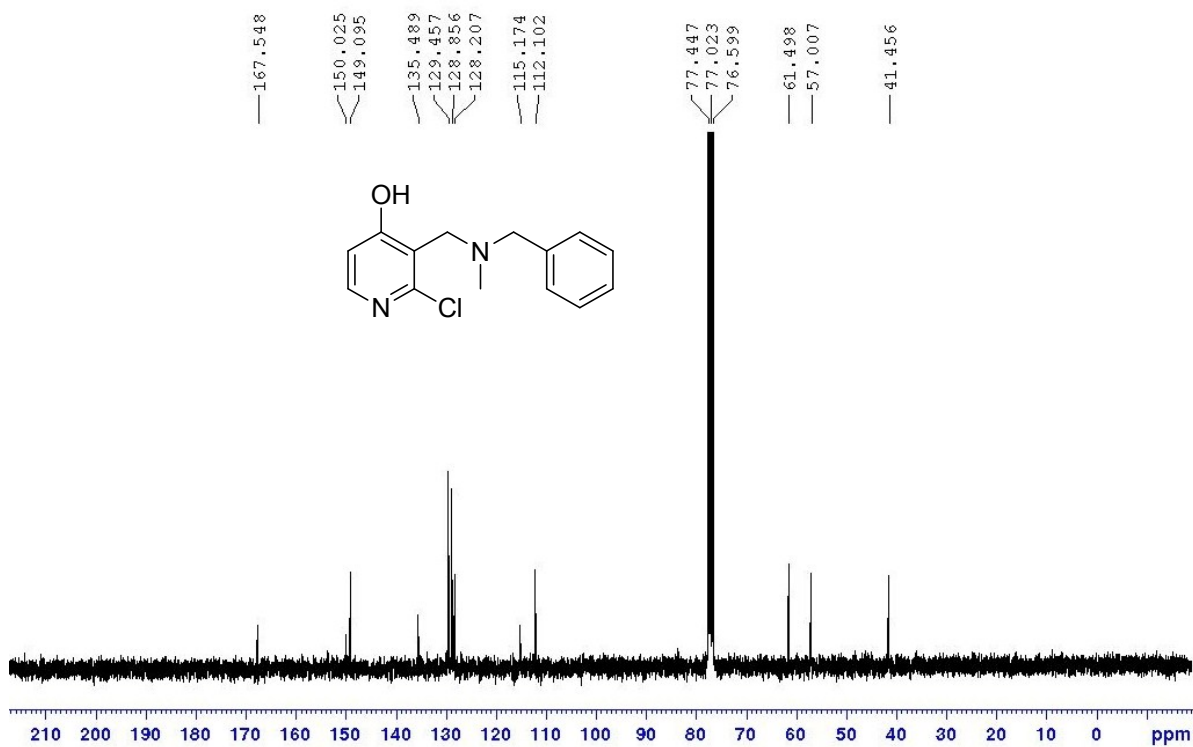

Spectrum56: <sup>13</sup>C{<sup>1</sup>H} NMR of 7a

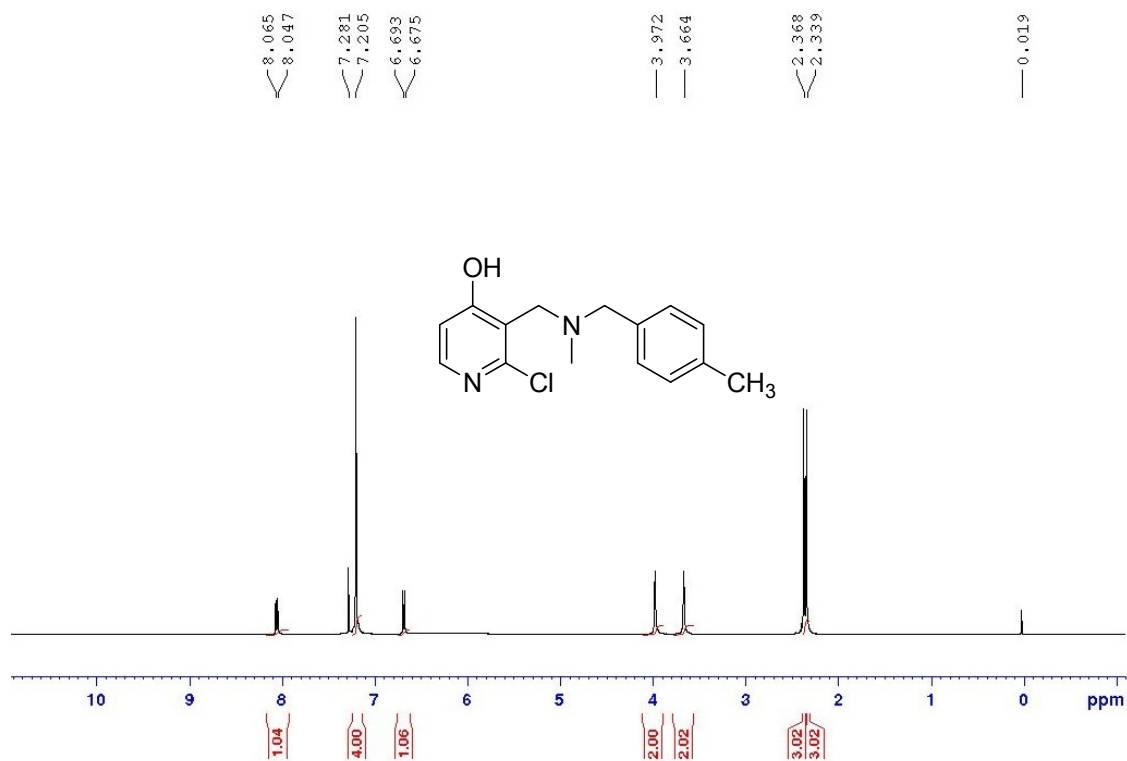

Spectrum57:  $^1\text{H}$  NMR of 7b

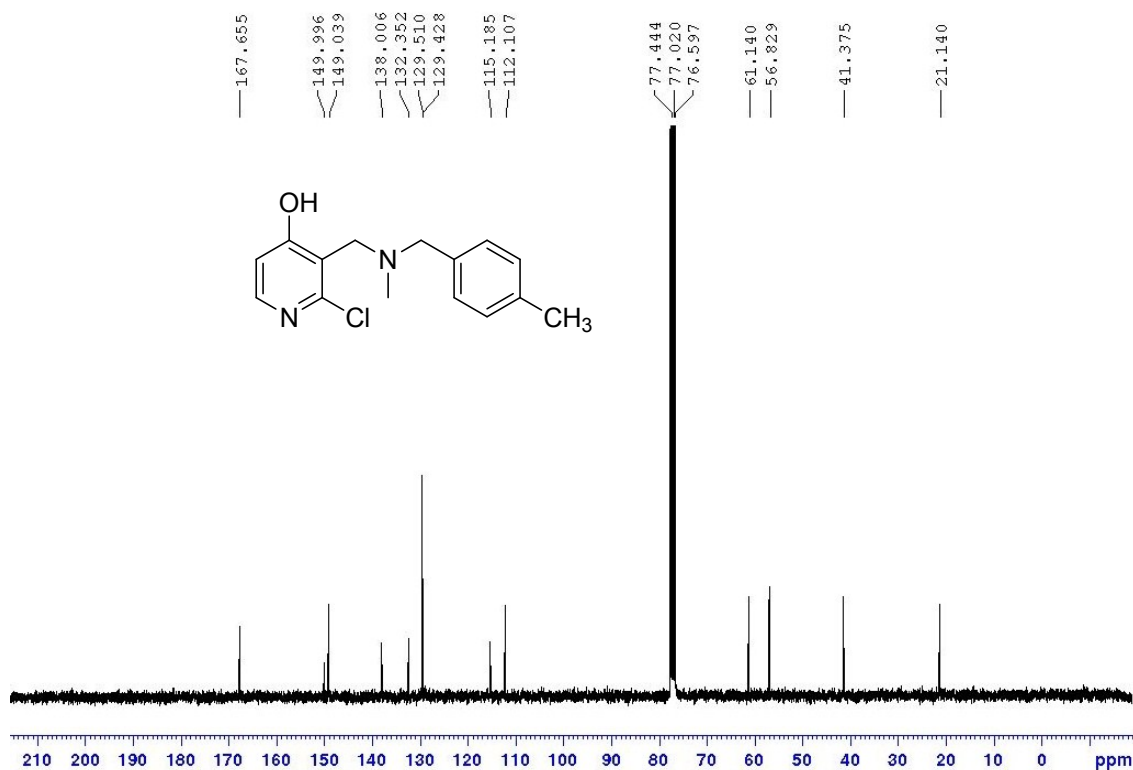

Spectrum58:  $^{13}\text{C}\{^1\text{H}\}$  NMR of 7b

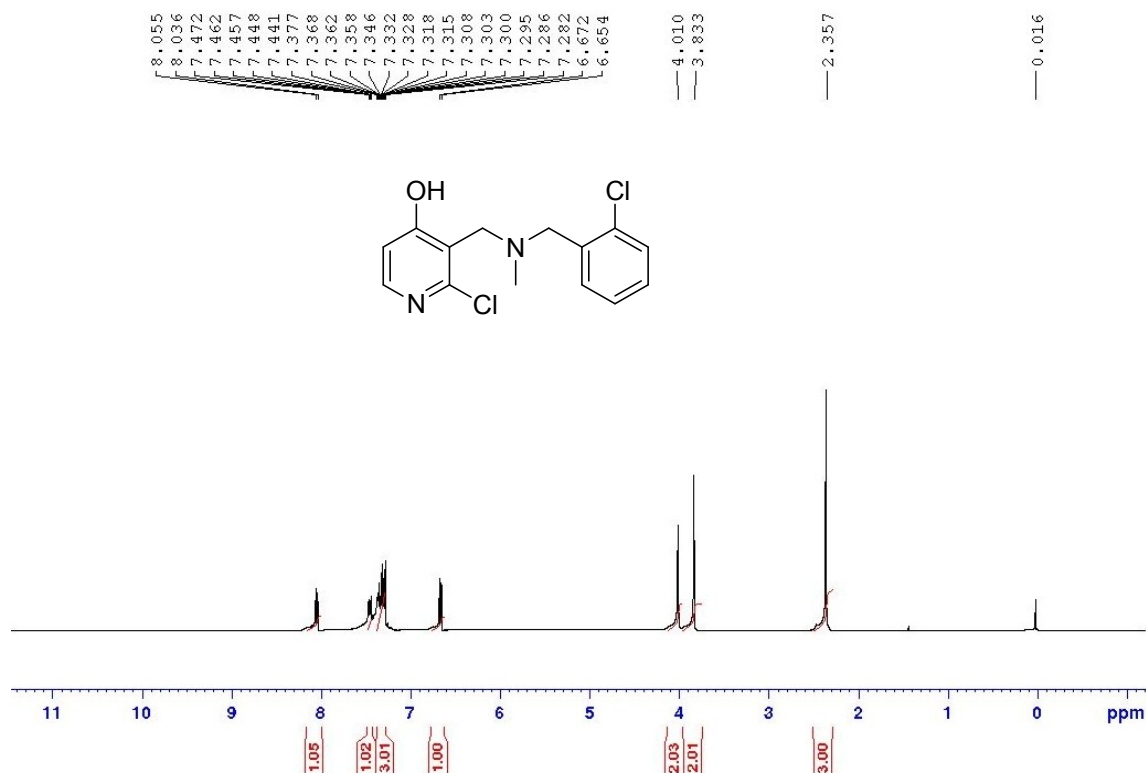

Spectrum59: <sup>1</sup>H NMR of 7c

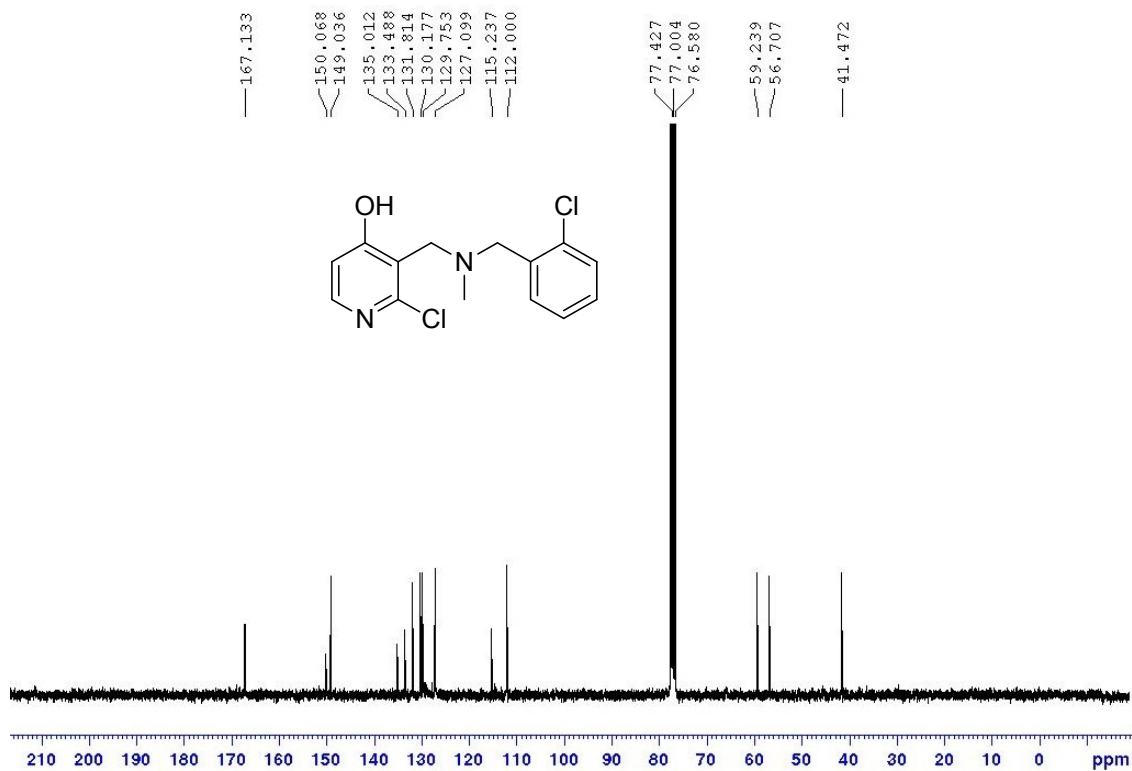

Spectrum60: <sup>13</sup>C{<sup>1</sup>H} NMR of 7c

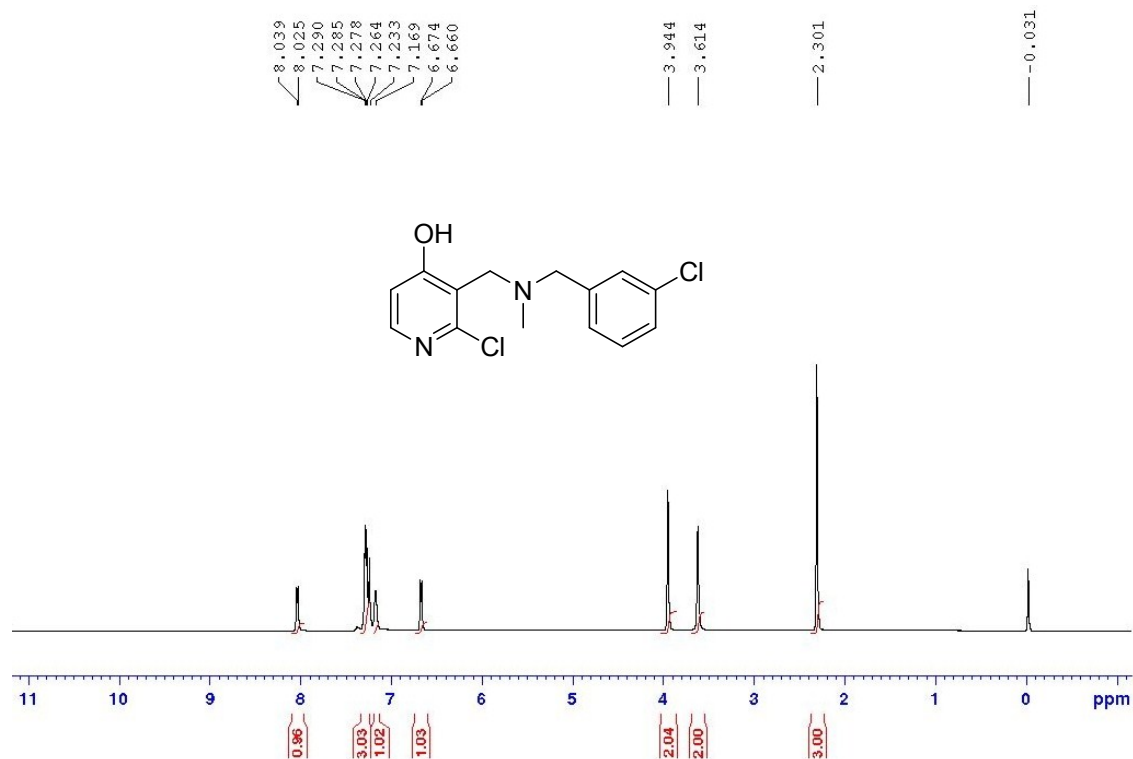

Spectrum61: <sup>1</sup>H NMR of 7d

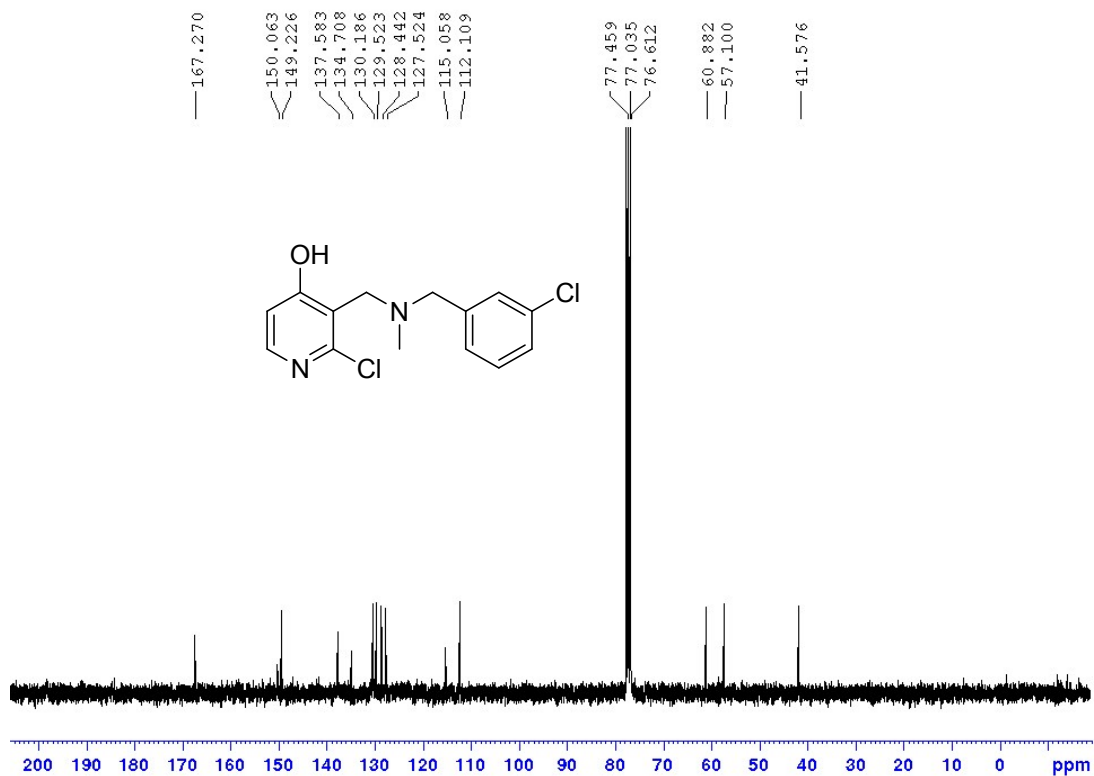

Spectrum62: <sup>13</sup>C{<sup>1</sup>H} NMR of 7d

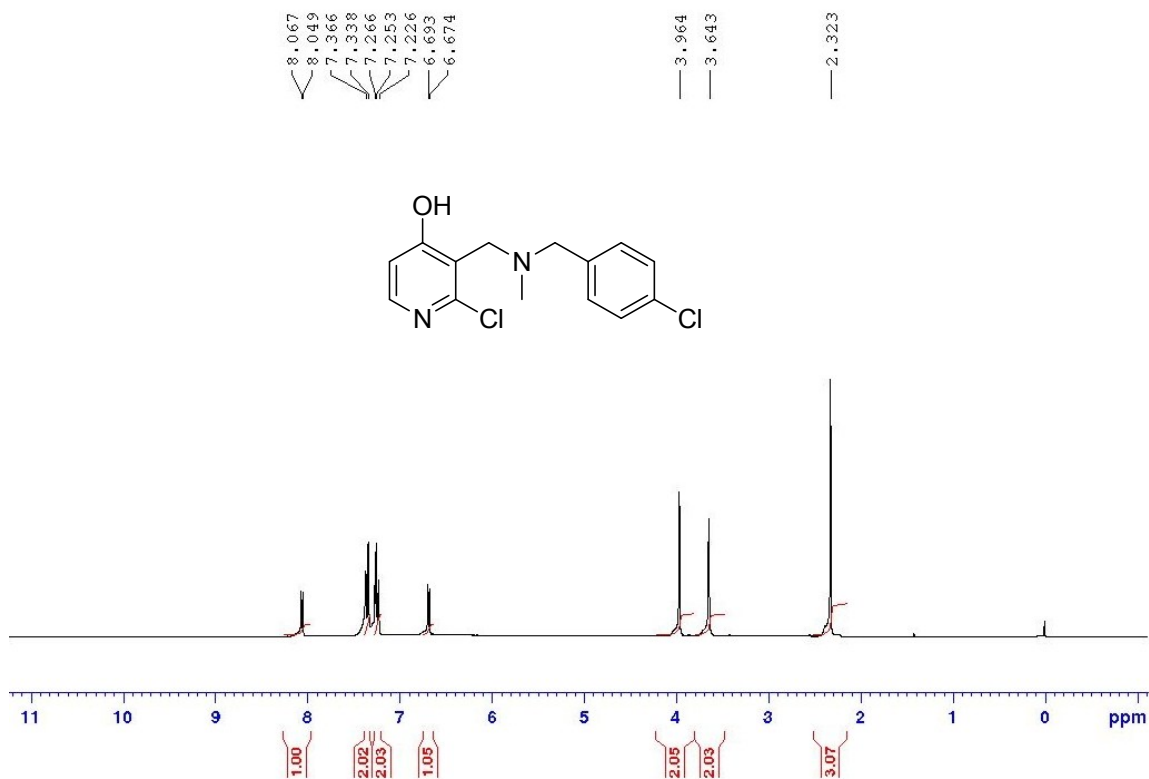

Spectrum63: <sup>1</sup>H NMR of 7e

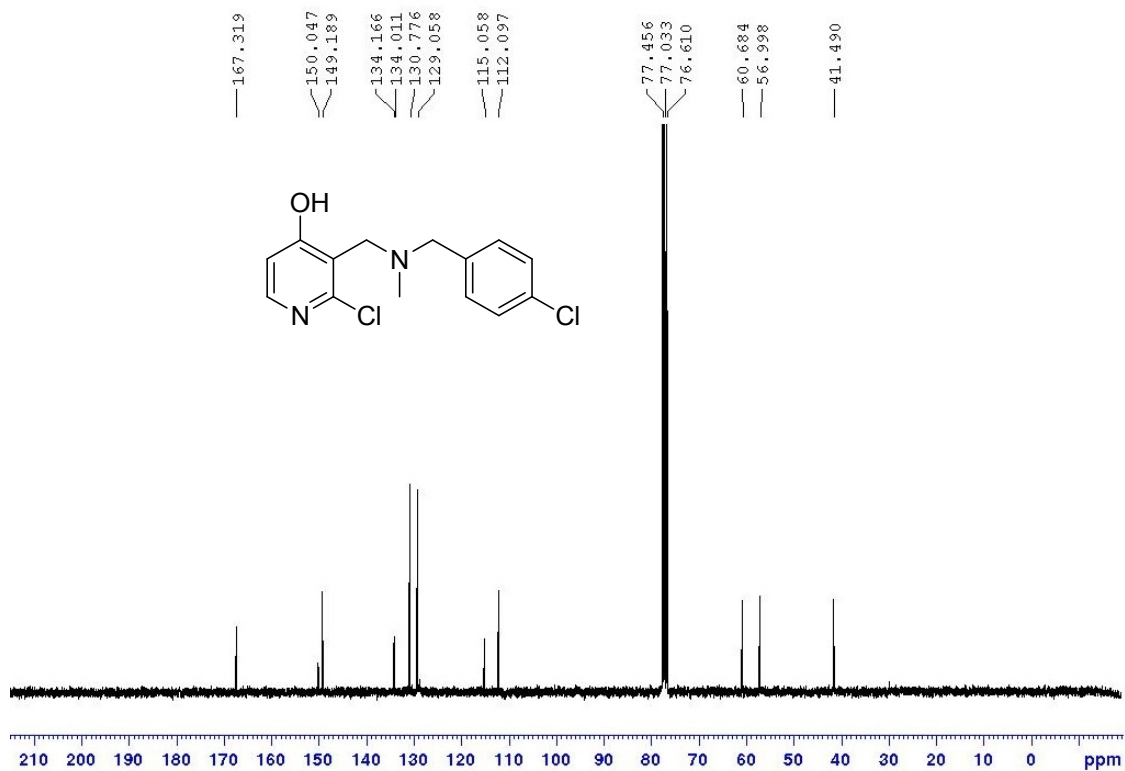

Spectrum64: <sup>13</sup>C{<sup>1</sup>H} NMR of 7e

### Procedure for free radical reaction: Inhibition by TEMPO

To the mixture of *N,N*-dimethylbenzylamine (**1a**, 0.1352 g, 1.0 mmol, 2 equiv.), phenol/naphthol (**2a/4a**, 0.5 mmol, 1 equiv.), *tert*-butyl hydroperoxide (0.2 mL, 1.2 mmol decane solution) and GO-Cu<sub>7</sub>S<sub>4</sub> NP catalyst (4 mg, 1 mol%), TEMPO (1, 2, 3, 4 equiv.) was added under nitrogen at room temperature. The reaction temperature was raised to 50 °C and the contents were stirred at the same temperature for 2 h. The reaction mixture was cooled to room temperature. The resulting suspension was diluted with ethylacetate and the organic layer was washed with brine solution (3 × 10 mL) and dried over anhydrous Na<sub>2</sub>SO<sub>4</sub>. Solvent was evaporated and the residue was purified by column chromatography on silica gel (eluting with hexane/ethyl acetate = 95:5). The corresponding product **3a** or **5a** was obtained in lower yield; and the yields were found to decrease in a dose dependent manner as shown below.

| Concentration of TEMPO | Yield of <b>3a</b> | Yield of <b>5a</b> |
|------------------------|--------------------|--------------------|
| 1 equiv.               | 32%                | 25%                |
| 2 equiv.               | 12%                | 9%                 |
| 3 equiv.               | 6%                 | 4%                 |
| 4 equiv.               | 0%                 | 0%                 |

### Procedure for HRMS of reaction mixture: formation of Iminium ion

To the mixture of *N,N*-dimethylbenzylamine (**1a**, 1.0 mmol), phenol (**2a**, 0.5 mmol) and *tert*-butyl hydroperoxide (0.1 mL, 0.6 mmol decane solution), GO-Cu<sub>7</sub>S<sub>4</sub> NPs catalyst (4 mg, 1 mol %) was added under nitrogen at room temperature. The reaction temperature was raised to 50 °C and the contents were stirred for 1 h. The reaction mixture was then cooled to room temperature. The resulting suspension was diluted with acetonitrile, filtered and injected for mass studies.

### Procedure for Time dependent NMR Study

Five parallel reactions between *N,N*-dimethylbenzylamine and phenol were set up under the standard conditions on a 0.5 mmol scale. The reactions were consecutively stopped at 0, 20, 40, 60 and 120 minutes. 30 μL of the sample was withdrawn from each reaction flask, and subjected

to  $^1\text{H}$ NMR analysis after diluting it with  $\text{CDCl}_3$  (0.5 mL). The NMR data was collected, and stacked together on same graph for analysis.

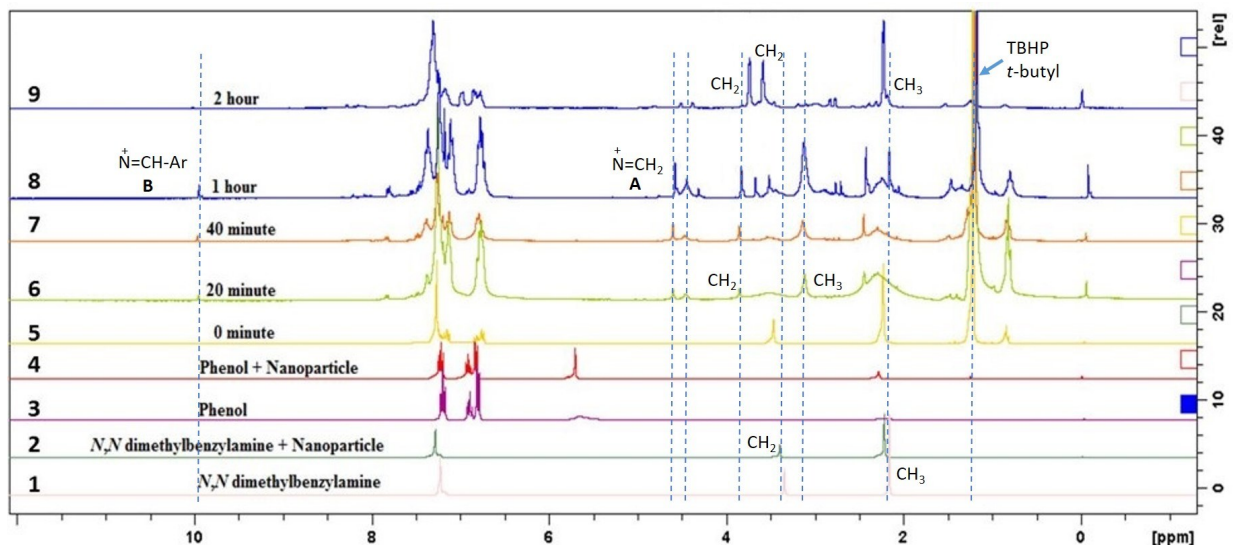

**Fig. S11** Time dependent  $^1\text{H}$ NMR spectra of reaction mixture

The downfield shifting of methyl and methylene protons of **1a**, and appearance of new peaks at around 4.5 and 10 ppm between 20-60 minutes indicated formation of iminium ion intermediates (A and B).

### Proposed Mechanism

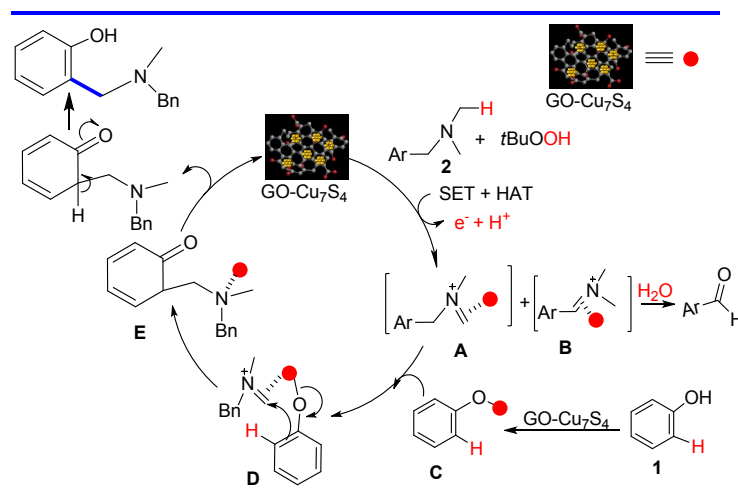

**Fig. S12** Proposed Mechanism

A *tert*-butoxyl radical is believed to be generated by copper catalyzed decomposition of TBHP, which assists a single electron transfer (SET) from amine to generate a radical cation. This is followed by abstraction of  $sp^3$  hydrogen of the radical cation to generate an iminium ion intermediate **A** or **B**. Iminium ion **B** upon hydrolysis results in the formation of benzaldehyde, which is seen in trace amounts. Coordination of phenol with GO-Cu<sub>7</sub>S<sub>4</sub> provides the copper phenolate intermediate **C**. **C** upon coordination with **A** results in the formation of complex **D**. Nucleophilic attack by *ortho*-phenol carbon on the iminium ion generates the Cu-coordinated ketone **E**. The final C–C coupled aminomethylated product is formed after tautomerization, and concurrent regeneration of the GO-Cu<sub>7</sub>S<sub>4</sub> catalyst for the next catalytic cycle.

**General procedure for the synthesis of 3a on 20 g scale:**

To the mixture of phenol (**1a**) (0.212 mol, 20g), *N,N*-dimethylbenzylamine (**2a**) (0.425 mol, 57.5g), and GO-Cu<sub>7</sub>S<sub>4</sub> NP catalyst (1.7g, 1 mol%), *tert*-butyl hydroperoxide (85 mL, 5-6 M decane solution) was added under nitrogen at room temperature dropwise in 1 h. The reaction temperature was raised to 50 °C and the contents were stirred at the same temperature for 4 h. The reaction was monitored by TLC after 2 h, the conversion was 60%. The conversion completed in 6 h, after which the reaction mixture was cooled to room temperature. The resulting suspension was diluted with ethylacetate and the organic layer was washed off with brine solution and dried over anhydrous Na<sub>2</sub>SO<sub>4</sub>. Solvent was evaporated and the residue was purified by column chromatography on silica gel (eluting with hexane/ethyl acetate = 95:5) Colourless liquid Yield; 75% (36.2g,)
